# Supplementary material for: Pregnancy exposure to air pollution and early childhood respiratory health in the Norwegian Mother and Child Cohort Study (MoBa)
Source: PubMed Central journal article supplement — BMJ Open. 2017 Dec 26;7(12):e015796. doi: 10.1136/bmjopen-2016-015796 (PMC5770814; doi:10.1136/bmjopen-2016-015796), 2017-12-26
Supplement: bmjopen-2016-015796.draft_revisions.pdf [file bmjopen-2016-015796.draft_revisions.pdf]

# BMJ Open

BMJ Open is committed to open peer review. As part of this commitment we make the peer review history of every article we publish publicly available.

When an article is published we post the peer reviewers' comments and the authors' responses online. We also post the versions of the paper that were used during peer review. These are the versions that the peer review comments apply to.

The versions of the paper that follow are the versions that were submitted during the peer review process. They are not the versions of record or the final published versions. They should not be cited or distributed as the published version of this manuscript.

BMJ Open is an open access journal and the full, final, typeset and author-corrected version of record of the manuscript is available on our site with no access controls, subscription charges or pay-per-view fees (<http://bmjopen.bmj.com>).

If you have any questions on BMJ Open's open peer review process please email [info.bmjopen@bmj.com](mailto:info.bmjopen@bmj.com)

# BMJ Open

## Pregnancy exposure to air pollution and early childhood respiratory health

|                                 |                                                                                                                                                                                                                                                                                                                                                                                                                                                                                                                                                                                                                                                                                                                                                                                                                                                                                |
|---------------------------------|--------------------------------------------------------------------------------------------------------------------------------------------------------------------------------------------------------------------------------------------------------------------------------------------------------------------------------------------------------------------------------------------------------------------------------------------------------------------------------------------------------------------------------------------------------------------------------------------------------------------------------------------------------------------------------------------------------------------------------------------------------------------------------------------------------------------------------------------------------------------------------|
| Journal:                        | <i>BMJ Open</i>                                                                                                                                                                                                                                                                                                                                                                                                                                                                                                                                                                                                                                                                                                                                                                                                                                                                |
| Manuscript ID                   | bmjopen-2016-015796                                                                                                                                                                                                                                                                                                                                                                                                                                                                                                                                                                                                                                                                                                                                                                                                                                                            |
| Article Type:                   | Research                                                                                                                                                                                                                                                                                                                                                                                                                                                                                                                                                                                                                                                                                                                                                                                                                                                                       |
| Date Submitted by the Author:   | 16-Jan-2017                                                                                                                                                                                                                                                                                                                                                                                                                                                                                                                                                                                                                                                                                                                                                                                                                                                                    |
| Complete List of Authors:       | Madsen, Christian; Nasjonalt folkehelseinstitutt, Department of Health and Inequality<br>Håberg, Siri; Nasjonalt folkehelseinstitutt, Domain for Mental and Physical Health<br>Magnus, Maria; Nasjonalt folkehelseinstitutt, Department of Chronic Diseases<br>Aamodt, Geir; Norwegian University of Life Sciences, Department of Landscape Architecture and Spatial Planning<br>Stigum, Hein; Norwegian Institute of Public Health, Department of Chronic Diseases; University of Oslo, Department of Community Medicine and Global Health<br>London, Stephanie J.; National Institute of Environmental Health Sciences, Epidemiology<br>Nystad, Wenche; Nasjonalt folkehelseinstitutt, Department of Chronic Diseases<br>Nafstad, Per; Nasjonalt folkehelseinstitutt, Department of Chronic Diseases; University of Oslo, Department of Community Medicine and Global Health |
| <b>Primary Subject Heading</b>: | Epidemiology                                                                                                                                                                                                                                                                                                                                                                                                                                                                                                                                                                                                                                                                                                                                                                                                                                                                   |
| Secondary Subject Heading:      | Reproductive medicine                                                                                                                                                                                                                                                                                                                                                                                                                                                                                                                                                                                                                                                                                                                                                                                                                                                          |
| Keywords:                       | air pollution, NO2, pregnancy, lower respiratory tract infections, wheezing, The Norwegian Mother and Child Cohort Study                                                                                                                                                                                                                                                                                                                                                                                                                                                                                                                                                                                                                                                                                                                                                       |
|                                 |                                                                                                                                                                                                                                                                                                                                                                                                                                                                                                                                                                                                                                                                                                                                                                                                                                                                                |

SCHOLARONE™  
Manuscripts

## Pregnancy exposure to air pollution and early childhood respiratory health

Christian Madsen<sup>a</sup>, Siri Eldevik Håberg<sup>a</sup>, Maria C. Magnus<sup>a</sup>, Geir Aamodt<sup>b</sup>, Hein Stigum<sup>a,c</sup>, Stephanie J. London<sup>d</sup>, Wenche Nystad<sup>a</sup>, Per Nafstad<sup>a,c</sup>

<sup>a</sup> Domain for Mental and Physical Health, Norwegian Institute of Public Health, Oslo, Norway

<sup>b</sup> Department of Landscape Architecture and Spatial Planning, Norwegian University of Life Sciences, Ås, Norway

<sup>c</sup> Department of Community Medicine and Global Health, Medical Faculty, University of Oslo, Oslo, Norway

<sup>d</sup> National Institute of Environmental Health Sciences, National Institutes of Health, Department of Health and Human Services, Research Triangle Park, North Carolina, USA

Correspondence to:

Christian Madsen

Tel. +4721078060

E-mail: [christian.madsen@fhi.no](mailto:christian.madsen@fhi.no)

Department of Health and Inequality,

Domain for Mental and Physical Health,

Norwegian Institute of Public Health,

P.O. Box 4404 Nydalen, N-0403 Oslo, Norway.

## Abstract

**Objectives** It is unclear whether maternal air pollution exposure during pregnancy induces changes in the developing respiratory system of a child and whether it has consequences for respiratory health in early childhood. We investigated associations between exposure to moderate levels of air pollution during pregnancy and early childhood lower respiratory tract infections (LRTI) and wheezing.

**Methods** This study used a sub-group of 17 533 participants in the Norwegian Mother and Child Cohort Study (MoBa). Air pollution levels at residential addresses were estimated using land use regression (LUR) models, and back-extrapolated to the period of each pregnancy. Information on lower respiratory tract infections (LRTI) and wheezing, and lifestyle factors was collected from questionnaires completed by mothers during pregnancy and when the child was 6 and 18 months of age.

**Results** Moderate levels of NO<sub>2</sub> exposure during pregnancy were not statistically significant associated with LRTI before age 6 months (adjusted OR 0.99; 95% CI 0.83 to 1.19), LRTI between 6-18 months (adjusted OR 0.99; 95% CI 0.83 to 1.19) and wheezing 6-18 months (adjusted OR 0.99; 95% CI 0.98 to 1.00). Stratified analysis indicated an increased risk for LRTIs 6 to 18 months in girls only (adjusted OR 1.23; 95% CI 1.02 to 1.48).

**Conclusions** There were no statistically significant associations for moderate levels of pregnancy NO<sub>2</sub> exposure and respiratory health outcomes during early childhood in overall analysis. However, stratified analysis gave some support to the idea that girls may have higher risk for developing LRTI due to prenatal air pollution exposure.

**What this paper adds**

- Respiratory disorders are common chronic disease in infants and young children, and special attention should be given to modifiable factors that may influence lung development at crucial stages.
- The role of environmental exposure such as ambient air pollution in the development of childhood chronic diseases in infants is still debated.
- We used a large pregnancy cohort to analyze longitudinal, the effect of pollution on respiratory symptoms in a birth cohort, considering pregnancy NO<sub>2</sub> exposure.
- We found no statistically significant associations for moderate levels exposure and respiratory health at early childhood in the overall analysis.

## Introduction

Lower respiratory tract infections (LRTI) are common in infants and young children.<sup>1</sup> They are caused primarily by viral pathogens and are clinically expressed as bronchiolitis, croup, or pneumonia.<sup>1</sup> Childhood wheeze is a symptom of several heterogeneous conditions, and may occur during viral respiratory infections or be associated with atopy.<sup>2</sup> Respiratory diseases in early childhood may have long term consequences, accounting for a significant proportion of adult lung disease.<sup>1,3</sup> Special attention should be given to modifiable factors that may influence lung development at crucial stages (prenatally and postnatally). Numerous epidemiologic studies have shown that children exposed to tobacco smoke or higher levels of ambient air pollution are more prone to develop respiratory disorders.<sup>4-6</sup> Air pollution may affect the lungs by inducing low-grade systemic inflammation and oxidative stress,<sup>7</sup> leading to pathological changes in the respiratory system. Children are particularly susceptible due to the continuous development of lungs that takes place from embryogenesis to early adolescence,<sup>3,8</sup> and continuous immune system development.<sup>9</sup> Of particular interest is intrauterine exposure, where air pollution may indirectly affect the developing lung tissue of the foetus.<sup>10,11</sup>

A number of studies have reported association of maternal smoking during pregnancy with frequent respiratory tract infections, chronic bronchitis, wheezing, and asthma in children.<sup>12-14</sup> In the Norwegian birth cohort, MoBa Håberg and colleagues have identified maternal smoking during pregnancy as an independent risk factor for wheeze and LRTI in the children's first 18 months of life.<sup>15</sup> There is an emerging interest in whether exposure to ambient air pollution during pregnancy might influence respiratory health in early childhood.<sup>16</sup> Some studies report associations of prenatal air pollution exposure with respiratory infections and decreased lung function.<sup>18-20</sup> Other studies have found no such association for LRTI and lung function in early childhood.<sup>21,22</sup>

In epidemiological studies investigating air pollution effects, precision of exposure estimation is an important challenge. A number of studies use data from personal monitors applied for a limited period, other studies consider residential proximity to major roads as an estimate of exposure to traffic-related air pollution. It has become increasingly common to apply modelling of air pollution exposure at individual residential addresses, such as dispersion models and land use regression (LUR) models. In this study, we used LUR modeled exposure to traffic-related pollutant NO<sub>2</sub> built for

1  
2  
3 specific areas of Norway: the two biggest cities in Norway (Oslo and Bergen) and their surrounding  
4 counties (Akershus and Hordaland). To our knowledge, this is the first Norwegian study to investigate  
5 air pollution exposure during pregnancy and respiratory health in early childhood. Norway is  
6 characterized by relatively low levels of air pollution, and it is of interest whether low levels might  
7 interfere with intrauterine respiratory system development and affect respiratory health later in life.  
8  
9

10  
11 We investigated the associations between estimated exposure to traffic-related air pollution  
12 during pregnancy and early childhood respiratory health (LRTI and wheeze) in selected urban and  
13 county areas of Norway.  
14  
15  
16  
17  
18  
19

## 20 21 **Methods**

### 22 23 *Study population*

24  
25 The Norwegian Mother and Child Cohort Study (MoBa) is a prospective population-based pregnancy  
26 cohort study conducted by the Norwegian Institute of Public Health.<sup>23</sup> Pregnant women were recruited  
27 from all over Norway from 1999 to 2008. Among invited women, 41% consented to participate.  
28 Mothers could participate with more than one child, resulting in 114 500 children and 95 200 mothers  
29 included in the cohort. All participants living in our study areas (Oslo, Bergen, Akershus, and  
30 Hordaland) were eligible for our study. Only data on singleton live births were used in the analysis.  
31 Pregnancy-related information was obtained from the Medical Birth Registry of Norway (MBRN).  
32 Mothers participating in the MoBa study completed a number of questionnaires. We used data on  
33 lifestyle characteristics from the first questionnaire completed at recruitment (approximately at week  
34 17-18 of pregnancy) and another questionnaire completed at week 30 of pregnancy. Information on  
35 the respiratory outcomes was collected from maternal questionnaires completed when the child was 6  
36 and 18 months of age. The number of children from the studied areas with non-missing air pollution  
37 exposure data was 17 533. The children were born from 2001 to 2009, 14 386 mothers had returned  
38 the questionnaire at 6 months, and 12 231 had returned the questionnaire at 18 months (Table 1). The  
39 study was approved by the regional Ethics committee and the Norwegian Data Inspectorate. The  
40 current study is based on versions VI (pregnancy data) and VIII (respiratory outcomes) of the quality-  
41 assured data files released for research on the 15<sup>th</sup> April 2011 and on the 14<sup>th</sup> February 2014,  
42  
43  
44  
45  
46  
47  
48  
49  
50  
51  
52  
53  
54  
55  
56  
57  
58  
59  
60

1  
2  
3 respectively.

## 4 5 6 7 **2.2 Outcomes and covariates**

8  
9 The outcomes were based on the maternal report from questionnaires filled when children were 6 and  
10  
11 18 months of age. LRTI included respiratory syncytial virus infection, bronchiolitis, bronchitis, or  
12  
13 pneumonia. Wheeze was defined as “wheezing/whistling in the chest” or “tightness in the chest”  
14  
15 between 6 and 18 months of age.

16  
17 The following characteristics were extracted from the MBRN: parity defined as number of  
18  
19 previous deliveries (0; 1;  $\geq 2$ ), mother’s age at birth (years), marital status (married/cohabiting; other)  
20  
21 sex of the child (boy; girl), and year of birth. Questionnaire information was used to determine:  
22  
23 maternal education (less than high school; high school; up to 4 years of college; more than 4 years of  
24  
25 college (master or professional degree)), maternal smoking during pregnancy (never; any smoking  
26  
27 during pregnancy), maternal weight at the beginning of pregnancy (kg) and maternal height (m) were  
28  
29 used to calculate body mass index (BMI) (maternal weight divided by squared maternal height),  
30  
31 maternal atopy (ever having hay fever, pollen allergy, atopic dermatitis, allergy to animal hair, other  
32  
33 types of allergy, or asthma).

34  
35 Adjustment variables were selected based on literature analysis and included maternal age at  
36  
37 delivery, maternal marital status, maternal education, sex of child, maternal pre-pregnancy BMI,  
38  
39 parity, smoking during pregnancy, maternal atopy, and area.

### 40 41 42 43 ***Air pollution exposure***

44  
45 Exposure to air pollution was estimated at the registered address at delivery. Women who did not  
46  
47 change their address during pregnancy were used in a sensitivity analysis. Area variable was defined  
48  
49 by the location of the address at delivery: Oslo, Akershus, Bergen and Hordaland.

50  
51 Estimates of air pollution exposure during pregnancy were based on the methodology  
52  
53 developed for the ESCAPE project.<sup>24 25</sup> LUR models for NO<sub>2</sub> levels were built for the studied areas in  
54  
55 order to account for regional specifics.<sup>26</sup> We used air pollution measurements conducted in 2010 for  
56  
57 Oslo and Akershus, and in 2011 for Bergen and Hordaland. Measurement campaigns included three  
58  
59



1  
2  
3 rounds of approximately two weeks duration with NO<sub>2</sub> measurements (during winter, summer and an  
4 intermediate season) within a one year period. Measurement sites were selected to represent the range  
5 of residential exposure for each study area. In analysis, we included sites with no missing data, and no  
6 geocoding mismatches.<sup>26</sup>  
7  
8

9  
10  
11 The mean exposures over the three measurement periods were averaged to obtain a yearly  
12 mean NO<sub>2</sub> level that was used in LUR modelling. LUR models were built separately for Oslo and  
13 Akershus. Only one model was built for the whole Hordaland County (including the city Bergen) due  
14 to a low number of valid measurement sites outside Bergen. Predictors for building the LUR model  
15 were obtained from a geographical information system (GIS) analysis of the N50 and VBASE maps  
16 (received in February 2013) providing information on land use, residential density, types of landscape  
17 and road network information. We built multiple linear regression models and performed diagnostic  
18 model tests according to the method described by Beelen and colleagues.<sup>24</sup>  
19  
20  
21  
22  
23  
24  
25  
26

27  
28 Yearly means of air pollution levels at residential address at birth were estimated using the  
29 resulting LUR models. Variables in models were truncated in accordance to the range of  
30 corresponding variables used for LUR model building. Negative modelled values were replaced with  
31 0.01 to avoid the unlikely scenario of negative modelled exposure and keep these in the analysis as  
32 low exposed addresses. In order to account for temporal variability, we used the ratio method of back-  
33 extrapolation to the period of each pregnancy using continuous routine monitoring station data.<sup>25</sup> Daily  
34 NO<sub>2</sub> measurements were obtained from the Norwegian Institute for Air Research database  
35 “Luftkvalitet.info” for the period 2000 - 2012 in Oslo (used for Oslo and Akershus), and for the period  
36 2003 - 2012 in Bergen (used for Bergen and Hordaland). Daily estimates of exposure were calculated  
37 using the ratio method of back-extrapolation: the LUR-modelled yearly estimate multiplied by the  
38 ratio between daily NO<sub>2</sub> routine monitoring station measurement and an annual average for the year  
39 when LUR measurement campaign took place. Daily NO<sub>2</sub> exposure estimates were averaged  
40 separately for 1<sup>st</sup>, 2<sup>nd</sup>, and 3<sup>rd</sup> trimester, and also over the whole pregnancy. Exposures by trimester and  
41 the whole pregnancy exposure were highly correlated and we therefore decided to use only the  
42 average NO<sub>2</sub> exposure during the whole pregnancy as our exposure estimate.  
43  
44  
45  
46  
47  
48  
49  
50  
51  
52  
53  
54  
55  
56  
57  
58  
59  
60

### *Statistical analysis*

Logistic regression models were used to evaluate associations between pregnancy NO<sub>2</sub> exposure and respiratory outcomes. Results are presented for crude and adjusted models. We performed stratified analysis by area, sex of child, season of birth, and maternal atopy. Multiplicative interactions were tested in the adjusted models between the continuous NO<sub>2</sub> pregnancy exposure variable and the following categorical variables: area, sex, parity, birth season and maternal atopy. Sensitivity analyses were performed by a) restricting the analysis to women who did not change address during pregnancy, and b) restricting the analysis to pregnancies during the last period of the MoBa recruitment. Area variable may reflect the spatial distribution of air pollution, and therefore a separate analysis was performed in adjusted model without the area variable. We used ArcGIS10.1 software (Esri, CA, USA) for GIS analyses; statistical analyses were performed using STATA 13.0 (StataCorp, Texas, USA).

### **Results**

The study population included in this study consisting of participants from the four study areas of Norway with pregnancy air pollution exposure data had similar characteristics as the whole MoBa cohort study with information from 6 months and at 18 months (Table 1). A total of 4.5% of children had LRTI at 6 months, and 12% of children had LRTI and 40.6% had wheezing symptoms between 6 and 18 months. Mean NO<sub>2</sub> exposure during whole pregnancy was  $13.6 \pm 6.9 \mu\text{g}/\text{m}^3 \text{NO}_2$ , which is well below the European Union air quality yearly average standard of  $40 \mu\text{g}/\text{m}^3 \text{NO}_2$ . The majority (86.7%) of the women did not change address during pregnancy. Maternal smoking in pregnancy was relatively uncommon (6.2%). Maternal atopy was reported in 33.1% of the women (Table 1). The distribution of the study population across birth seasons reflects the timing of recruitment into MoBa and we therefore observe slight deviation from the equal seasonal distribution.

We found no associations of NO<sub>2</sub> exposure during pregnancy with LRTI at 6 months, LRTI at 6-18 months, or wheeze at 6-18 months in the overall analysis (Table 2). The main covariates affecting the change in significance of odds ratio estimate from the crude to the adjusted models were parity and area. In the stratified analysis by area we observed a consistent pattern, although not statistically

1  
2  
3 significant, of positive associations for LRTI and wheeze for participants living outside big cities, in  
4 Akershus and Hordaland (Table 2). Stratified analysis by sex also showed a consistent tendency for  
5 association of pregnancy NO<sub>2</sub> exposure with LRTI and wheeze in girls, but not in boys (Figure 1). For  
6 instance, the risk of developing LRTI 6-18 months in girls was equal to an OR =1.23 (95% CI 1.02 to  
7 1.48, p=0.03) per each 10µg/m<sup>3</sup> increase in NO<sub>2</sub> exposure during pregnancy. Stratified analysis by  
8 maternal atopy status and birth season did not identify any important differences between the groups.  
9 No statistically significant interactions were detected between NO<sub>2</sub> exposure and maternal atopy, sex  
10 of child, area, birth season, or parity. Sensitivity analyses resulted in no substantial changes compared  
11 to the reported results. This was also the case for crude analyses in a sample of children with available  
12 information on all covariates. Excluding from the adjustment set the area variable, as a factor  
13 potentially reflecting spatial distribution of air pollution, did not considerably change the results.  
14 Restricting the analysis to pregnancies during the last period of the MoBa recruitment did not result in  
15 substantial changes to the reported results.  
16  
17  
18  
19  
20  
21  
22  
23  
24  
25  
26  
27  
28  
29  
30  
31

## 32 Discussion

33 In this study, we found no statistically significant associations for pregnancy NO<sub>2</sub> exposure with LRTI  
34 or wheeze in early childhood in the overall analysis. In stratified analyses, we observed a tendency of  
35 increased risk of developing LRTI in girls, but not in boys.  
36  
37  
38

39 The study of Esplugues and colleagues has reported similar results of no association of LUR-  
40 modelled prenatal NO<sub>2</sub> exposure (with higher than in our study whole pregnancy mean NO<sub>2</sub> values of  
41 39.1µg/m<sup>3</sup>) with LRTI or persistent cough during the 1<sup>st</sup> year of life, but they did report an association  
42 between postnatal NO<sub>2</sub> exposure and persistent cough.<sup>21</sup> In the study of Clark and colleagues exposure  
43 to a range of pollutants, including NO<sub>2</sub> and NO, was investigated during pregnancy and the 1<sup>st</sup> year of  
44 life and their associations with asthma up to 3 - 4 years were found for both prenatal and postnatal  
45 exposures.<sup>27</sup> Jedrychowski and colleagues studied prenatal exposure to another transport-related air  
46 pollutant PM<sub>2.5</sub>, using personal monitors for short periods of time during the 2<sup>nd</sup> trimester. Exposure to  
47 PM<sub>2.5</sub> was associated with recurrent broncho-pulmonary infections in children of up to 7 years of  
48 age,<sup>19</sup> and with decrease in lung function of 5-year old children in the highest quartile of exposure.<sup>18</sup> In  
49  
50  
51  
52  
53  
54  
55  
56  
57  
58  
59  
60

1  
2  
3 the large international ESCAPE study, uniting cohorts from Germany, Sweden, Netherlands, and the  
4 UK, decrease in lung function parameters has been associated with exposure to LUR-modelled annual  
5 average NO<sub>2</sub>, NO<sub>x</sub>, PM<sub>2.5</sub> absorbance, and PM<sub>2.5</sub> at current address at 6 - 8 years of age, but not at birth  
6 address.<sup>22</sup> Studies that used distance to major road as a proxy for pregnancy air pollution exposure  
7 reported positive associations with respiratory infections up to 3 years of age,<sup>20</sup> and with doctor-  
8 diagnosed asthma and atopic eczema.<sup>28</sup>

9  
10  
11 In our analysis, we found a sex difference in prenatal NO<sub>2</sub> exposure association with LRTI:  
12 the association was present in girls, but not in boys. Male sex is a known risk factor for both  
13 respiratory infections and wheezing in childhood.<sup>2 29 30</sup> However, the interaction between  
14 environmental exposures and prenatal lung development in boys and girls remains uncertain,<sup>31</sup> and our  
15 finding was from one of several subsample analyses. There are differences in prenatal anatomic and  
16 physiological respiratory system development in sexes, as well as different sex-hormone effects on the  
17 immune system functioning.<sup>31-33</sup> As was reviewed by Casimir and colleagues, while boys outnumber  
18 girls in acute respiratory infections, the chronicity of inflammatory process has more adverse effects  
19 on girls than on boys.<sup>34</sup> Given the chronic low-grade systemic inflammation associated with air  
20 pollution exposure,<sup>7</sup> we might expect more adverse effect in girls. However, this issue is insufficiently  
21 studied, and the existing reports give contradictory results. For instance, there are different patterns of  
22 lung function decline in asthmatic boys and girls exposed to maternal smoking *in utero* compared to  
23 effects in children without asthma.<sup>35</sup> Another study found no difference between boys and girls with  
24 respect to prenatal and postnatal exposure to tobacco smoke and asthma development.<sup>36</sup> The  
25 international ESCAPE study reported stronger effects of air pollution exposure during the first year of  
26 life, which was LUR-modelled at birth address, on pneumonia in girls.<sup>6</sup>

27  
28  
29 We found some indication of different patterns for associations between prenatal air pollution  
30 exposure and early respiratory health in study participants living in cities versus counties outside  
31 cities. Living outside the city was associated with higher risk of developing LRTI and wheeze,  
32 although the estimates were not statistically significant. This might be due to a higher misclassification  
33 of exposure in cities because of higher mobility and less staying at home. On the other hand, non-city  
34 population might have more homogenous exposure and spending more time close to home. Difference  
35  
36  
37  
38  
39  
40  
41  
42  
43  
44  
45  
46  
47  
48  
49  
50  
51  
52  
53  
54  
55  
56  
57  
58  
59  
60

1  
2  
3 in distribution of socioeconomic factors or parity might play a role: families with several children tend  
4 to move out of large cities in Norway. Familiar predisposition to allergic disorders may be an  
5 important factor in modifying the effect of tobacco smoke exposure on wheezing.<sup>37</sup> Certain months of  
6 birth, due to their correlation with viral infections seasons, can be a risk factor for wheezing and  
7 LRTI.<sup>2,30</sup> Our study found no differences in the effect from groups divided by maternal atopy status or  
8 birth season.

9  
10 Our study applied standardized individual exposure assessment for the large study population,  
11 and detailed information on potential confounders was collected from prenatal questionnaires.  
12  
13 Estimates for prenatal exposure to NO<sub>2</sub> were based on LUR models and temporal back-extrapolation  
14 of exposure during entire pregnancy at the address at birth. Such estimates might be a subject to non-  
15 differential misclassification of exposure due to different mobility and lifestyle factors. However,  
16 results of the sensitivity analysis only in women who did not change address during pregnancy were  
17 similar to the overall analysis. The mean air pollution exposure levels explored in this study may be  
18 relatively low for detecting the association between prenatal exposure and postnatal respiratory health,  
19 and the reported effect estimates might be biased towards null due to non-differential misclassification  
20 of exposure. It could also be difficult to disentangle prenatal and early postnatal exposure to air  
21 pollution if family continues to live at the same address at these two periods. Prenatal exposures need  
22 to be carefully studied for identifying potential critical windows of exposure. In our data, exposures by  
23 trimester were highly correlated with whole pregnancy exposure, and therefore we only assessed the  
24 exposure during entire pregnancy. More studies are needed for exploring the causative association  
25 between prenatal air pollution exposure and respiratory health early in childhood, for characterizing  
26 critical time windows and main pollutants that are involved in pathological changes. Of interest for  
27 future research is the sex difference in prenatal exposure effect identified in our study.

28  
29 In this large Norwegian pregnancy cohort we found no statistically significant associations for  
30 moderate levels of pregnancy NO<sub>2</sub> exposure and childhood respiratory health measured by LRTI and  
31 wheeze.  
32  
33  
34  
35  
36  
37  
38  
39  
40  
41  
42  
43  
44  
45  
46  
47  
48  
49  
50  
51  
52  
53  
54  
55  
56  
57  
58  
59  
60

1  
2  
3 **Acknowledgements:** The co-authors would like to express gratitude to all MoBa cohort participants  
4 and research team, to Sviatlana Panasevich and Jon Wickmann at NIPH for their help with the  
5 database management, and to the Norwegian Institute for Air Research team for providing valuable  
6 research data thru their national air quality database.  
7  
8  
9

10  
11  
12 **Contribution to authorship:** PN, SJL, WN, PM were involved in conception, hypothesis delineation  
13 and study design. SJL, GA, SEH, CM contributed to the exposure assessment. CM and PN drafted the  
14 manuscript. All authors were involved in data interpretation and approved the final submitted version  
15 of the manuscript.  
16  
17  
18  
19

20  
21  
22 **Funding:** The Norwegian Mother and Child Cohort Study is supported by the Norwegian Ministry of  
23 Health and the Ministry of Education and Research, NIH/NIEHS (contract no N01-ES-75558),  
24 NIH/NIDS (grant no.1 UO1NS 047537-01 and grant no.2 UO1 NS 047537-06A1). This study was  
25 also supported by the Research Council of Norway (grant no.196102) and the Intramural Research  
26 Program of the NIH, National Institute of Environmental Health Sciences (project number Z01  
27 ES49019).  
28  
29  
30  
31  
32  
33  
34  
35  
36

37 **Details of ethics approval:** The Norwegian Mother and Child Cohort Study has approvals from the  
38 Regional Ethics Committee and the Norwegian Data Inspectorate. The current study is based on  
39 version VI of the quality-assured data files released for research on the 15<sup>th</sup> April 2011.  
40  
41  
42  
43  
44

45 **Data sharing statement:** Technical description of the MoBa data can be found at the study website  
46 (<https://www.fhi.no/en/studies/moba/>). Researchers can apply for access to the dataset  
47 (<https://www.fhi.no/en/more/research--access-to-data/>). Statistical code is available upon request from  
48 the corresponding author.  
49  
50  
51  
52  
53

54  
55 **Competing interests:** none declared.  
56  
57  
58  
59  
60

## References

1. Graham NM. The epidemiology of acute respiratory infections in children and adults: a global perspective. *Epidemiol Rev* 1990;12:149-178.
2. Sherriff A, Peters TJ, Henderson J, *et al*. Risk factor associations with wheezing patterns in children followed longitudinally from birth to 3(1/2) years. *Int J Epidemiol* 2001;30:1473-1484.
3. Merkus PJ. Effects of childhood respiratory diseases on the anatomical and functional development of the respiratory system. *Paediatr Respir Rev*, 2003;4:28-39.
4. Carlsen KH, Carlsen KC. Respiratory effects of tobacco smoking on infants and young children. *Paediatr Respir Rev*, 2008;9:11-20.
5. Goldizen FC, Knibbs LD, Sly PD. Respiratory effects of air pollution on children. *Pediatr Pulmonol* 2016;51:94-108.
6. MacIntyre EA, Gehring U, Molter A, *et al*. Air pollution and respiratory infections during early childhood: an analysis of 10 European birth cohorts within the ESCAPE Project. *Environ Health Perspect* 2014;122:107-113.
7. Brook RD, Rajagopalan S, Pope CA, *et al*. Particulate matter air pollution and cardiovascular disease: An update to the scientific statement from the American Heart Association. *Circulation* 2010;121:2331-2378.
8. Pinkerton KE, Joad JP. Influence of air pollution on respiratory health during perinatal development. *Clin Exp Pharmacol Physiol* 2006;33:269-272.

- 1  
2  
3 9. Goenka A, Kollmann TR. Development of immunity in early life. *J Infect* 2015;71:S112-120.  
4  
5  
6  
7 10. Nelly D, Plusquin M, xx, *et al.* In Utero Fine Particle Air Pollution and Placental Expression  
8 of Genes in the Brain-Derived Neurotrophic Factor Signaling Pathway: An ENVIRONAGE  
9 Birth Cohort Study. *Environ Health Perspect* 2015;123:834-840.  
10  
11  
12  
13  
14  
15 11. Veras MM, Damaceno-Rodrigues NR, Caldini EG, *et al.* Particulate Urban Air Pollution  
16 Affects the Functional Morphology of Mouse Placenta. *BIOLOGY OF REPRODUCTION*  
17 2008;79:578-584.  
18  
19  
20  
21  
22  
23 12. Burke H, Leonardi-Bee J, Hashim A, *et al.* Prenatal and passive smoke exposure and  
24 incidence of asthma and wheeze: systematic review and meta-analysis. *Pediatrics*  
25 2012;129:735-744.  
26  
27  
28  
29  
30  
31 13. Jaakkola JJ, Kosheleva AA, Katsnelson BA, *et al.* Prenatal and postnatal tobacco smoke  
32 exposure and respiratory health in Russian children. *Respir Res* 2006;7:48.  
33  
34  
35  
36  
37 14. Ruskamp J, Smit H, Rovers M, *et al.* Neonatal total IgE and respiratory tract infections in  
38 children with intrauterine smoke exposure. *Arch Dis Child* 2010;95:427-431.  
39  
40  
41  
42  
43 15. Haberg SE, Stigum H, Nystad W, *et al.* Effects of pre- and postnatal exposure to parental  
44 smoking on early childhood respiratory health. *Am J Epidemiol* 2007;166:679-686.  
45  
46  
47  
48  
49 16. Proietti E, Roosli M, Frey U, *et al.* Air Pollution During Pregnancy and Neonatal Outcome: A  
50 Review. *Journal of Aerosol Medicine and Pulmonary Drug Delivery* 2013;26:9-23.  
51  
52  
53  
54  
55 17. Vieira SE. The health burden of pollution: the impact of prenatal exposure to air pollutants. *Int*  
56 *J Chron Obstruct Pulmon Dis* 2015;10:1111-1121.  
57  
58  
59  
60



- 1  
2  
3  
4  
5 18. Jedrychowski WA, Perera FP, Maugeri U, *et al.* Effect of prenatal exposure to fine particulate  
6 matter on ventilatory lung function of preschool children of non-smoking mothers. *Paediatr*  
7 *Perinat Epidemiol* 2010;24:492-501.  
8  
9  
10  
11  
12  
13 19. Jedrychowski WA, Perera P, Spengler JD, *et al.* Intrauterine exposure to fine particulate  
14 matter as a risk factor for increased susceptibility to acute broncho-pulmonary infections in  
15 early childhood. *Int J Hyg Environ Health* 2013;216:395-401.  
16  
17  
18  
19  
20  
21 20. Rice MB, Rifas-Shiman SL, Oken E, *et al.* Exposure to traffic and early life respiratory  
22 infection: A cohort study. *Pediatr Pulmonol* 2014;50:252-259.  
23  
24  
25  
26  
27 21. Esplugues A, Ballester F, Estarlich M, *et al.* Outdoor, but not indoor, nitrogen dioxide  
28 exposure is associated with persistent cough during the first year of life. *Sci Total Environ*,  
29 2011;409:4667-4673.  
30  
31  
32  
33  
34  
35 22. Gehring U, Gruzieva O, Agius RM, *et al.* Air pollution exposure and lung function in  
36 children: the ESCAPE project. *Environ Health Perspect* 2013;121:1357-1364.  
37  
38  
39  
40  
41 23. Magnus P, Birke C, Vejrup K, *et al.* Cohort Profile Update: The Norwegian Mother and Child  
42 Cohort Study (MoBa). *Int J Epidemiol* 2016;45:382-388.  
43  
44  
45  
46  
47 24. Beelen R, Hoek G, Vienneau D, *et al.* Development of NO<sub>2</sub> and NO<sub>x</sub> land use regression  
48 models for estimating air pollution exposure in 36 study areas in Europe - The ESCAPE  
49 project. *Atmospheric Environment* 2013;72:10-23.  
50  
51  
52  
53  
54  
55 25. Pedersen M, Giorgis-Allemand L, Bernard C, *et al.* Ambient air pollution and low  
56 birthweight: a European cohort study (ESCAPE). *Lancet Respir Med* 2013;1:695-704.  
57  
58  
59  
60

- 1  
2  
3  
4  
5 26. Panasevich S, Håberg SE, Aamodt G, *et al.* Association between pregnancy exposure to air  
6 pollution and birth weight in selected areas of Norway. *Archives of Public Health* 2016;74:26.  
7  
8  
9  
10  
11 27. Clark NA, Demers PA, Karr CJ, *et al.* Effect of early life exposure to air pollution on  
12 development of childhood asthma. *Environ Health Perspect* 2010;118:284-290.  
13  
14  
15  
16  
17 28. Miyake Y, Tanaka K, Fujiwara H, *et al.* Residential proximity to main roads during pregnancy  
18 and the risk of allergic disorders in Japanese infants: the Osaka Maternal and Child Health  
19 Study. *Pediatr Allergy Immunol* 2010;21:22-28.  
20  
21  
22  
23  
24  
25 29. Herr M, Just J, Nikasinovic L, *et al.* Influence of host and environmental factors on wheezing  
26 severity in infants: findings from the PARIS birth cohort. *Clin Exp Allergy* 2012;42:275-283.  
27  
28  
29  
30  
31 30. Simoes EA. Environmental and demographic risk factors for respiratory syncytial virus lower  
32 respiratory tract disease. *J Pediatr* 2003;143:S118-126.  
33  
34  
35  
36  
37 31. Postma DS. Gender differences in asthma development and progression. *Gend Med*  
38 2007;4:S133-146.  
39  
40  
41  
42  
43 32. Muenchhoff M, Goulder PJ. Sex differences in pediatric infectious diseases. *J Infect Dis*  
44 2014;209:S120-126.  
45  
46  
47  
48  
49 33. Uekert SJ, Akan G, Evans MD, *et al.* Sex-related differences in immune development and the  
50 expression of atopy in early childhood. *J Allergy Clin Immunol* 2006;118:1375-1381.  
51  
52  
53  
54  
55  
56 34. Casimir GJ, Lefevre N, Corazza F, *et al.* Sex and inflammation in respiratory diseases: a  
57 clinical viewpoint. *Biol Sex Differ* 2013;4:16.  
58  
59  
60

- 1  
2  
3  
4  
5 35. Li YF, Gilliland FD, Berhane K, *et al.* Effects of in utero and environmental tobacco smoke  
6  
7 exposure on lung function in boys and girls with and without asthma. *Am J Respir Crit Care*  
8  
9 *Med* 2000;162:2097-2104.  
10  
11  
12  
13 36. Gilliland FD, Li YF, Peters JM. Effects of maternal smoking during pregnancy and  
14  
15 environmental tobacco smoke on asthma and wheezing in children. *Am J Respir Crit Care*  
16  
17 *Med* 2001;163:429-436.  
18  
19  
20  
21 37. Keil T, Lau S, Roll S, *et al.* Maternal smoking increases risk of allergic sensitization and  
22  
23 wheezing only in children with allergic predisposition: longitudinal analysis from birth to 10  
24  
25 years. *Allergy* 2009;64:445-451.  
26  
27  
28  
29  
30  
31  
32  
33  
34  
35  
36  
37  
38  
39  
40  
41  
42  
43  
44  
45  
46  
47  
48  
49  
50  
51  
52  
53  
54  
55  
56  
57  
58  
59  
60

**Table 1.** Descriptive statistics for study participants from the MOBA cohort.

|                                                                           | Baseline cohort at birth with NO <sub>2</sub> data (N=17 533) | Questionnaire at 6 months (N=14 386) | Questionnaire at 18 months (N=12 231) |
|---------------------------------------------------------------------------|---------------------------------------------------------------|--------------------------------------|---------------------------------------|
| Oslo                                                                      | 4 669 (26.6)                                                  | 3 801 (26.4)                         | 3 320 (27.1)                          |
| Akershus                                                                  | 7 554 (43.1)                                                  | 6 284 (43.7)                         | 5 350 (43.7)                          |
| Bergen                                                                    | 3 869 (22.1)                                                  | 3 135 (21.8)                         | 2 591 (21.2)                          |
| Hordaland                                                                 | 1 441 (8.2)                                                   | 1 166 (8.1)                          | 970 (7.9)                             |
| LRTI0- 6 months                                                           |                                                               | 653 (4.5)                            |                                       |
| Missing                                                                   |                                                               | 500 (3.5)                            |                                       |
| LRTI 6- 18 months                                                         |                                                               |                                      | 1 469 (12.0)                          |
| Missing                                                                   |                                                               |                                      | 230 (1.9)                             |
| Wheeze 6- 18 months                                                       |                                                               |                                      | 4 961 (40.6)                          |
| Missing                                                                   |                                                               |                                      | 255 (2.1)                             |
| Women who changed address during pregnancy                                | 2 336 (13.3)                                                  | 1 782 (12.4)                         | 1 471 (12.0)                          |
| Parity                                                                    |                                                               |                                      |                                       |
| 0                                                                         | 8 310 (47.4)                                                  | 6 973 (48.5)                         | 6 003 (49.1)                          |
| 1                                                                         | 6 328 (36.1)                                                  | 5 138 (35.7)                         | 4 310 (35.2)                          |
| ≥2                                                                        | 2 895 (16.5)                                                  | 2 275 (15.8)                         | 1 918 (15.7)                          |
| Sex of child                                                              |                                                               |                                      |                                       |
| Boy                                                                       | 8 925 (50.9)                                                  | 7 285 (50.6)                         | 6 177 (50.5)                          |
| Girl                                                                      | 8 608 (49.1)                                                  | 7 101 (49.4)                         | 6 054 (49.5)                          |
| Maternal age at delivery, years                                           | 31.0 ± 4.5                                                    | 31.1 ± 4.4                           | 31.2 ± 4.3                            |
| Marital status                                                            |                                                               |                                      |                                       |
| Married/cohabiting                                                        | 16 780 (95.7)                                                 | 13 839 (96.2)                        | 11 797 (96.5)                         |
| Other                                                                     | 753 (4.3)                                                     | 547 (3.8)                            | 434 (3.6)                             |
| Maternal education                                                        |                                                               |                                      |                                       |
| Less than high school                                                     | 986 (5.6)                                                     | 713 (5.0)                            | 547 (4.5)                             |
| High school                                                               | 4 175 (23.8)                                                  | 3 465 (24.1)                         | 2 845 (23.3)                          |
| Up to 4 years of college                                                  | 6 480 (37.0)                                                  | 5 677 (39.5)                         | 4 919 (40.2)                          |
| More than 4 years of college (master or professional degree)              | 4 867 (27.8)                                                  | 4 254 (29.6)                         | 3 731 (30.5)                          |
| Missing                                                                   | 1 025 (5.9)                                                   | 277 (1.9)                            | 189 (1.6)                             |
| Maternal smoking during pregnancy                                         | 1 085 (6.2)                                                   | 843 (5.9)                            | 675 (5.5)                             |
| Missing                                                                   | 1 000 (5.7)                                                   | 263 (1.8)                            | 185 (1.5)                             |
| Maternal pre-pregnancy body mass index <sup>a</sup>                       | 23.5 ± 3.8                                                    | 23.5 ± 3.7                           | 23.5 ± 3.7                            |
| Maternal atopy                                                            | 5 802 (33.1)                                                  | 4 947 (34.4)                         | 4 276 (35.0)                          |
| Season of birth                                                           |                                                               |                                      |                                       |
| Winter                                                                    | 4 099 (23.4)                                                  | 3 352 (23.3)                         | 2 858 (23.4)                          |
| Spring                                                                    | 4 686 (26.7)                                                  | 3 851 (26.8)                         | 3 191 (26.1)                          |
| Summer                                                                    | 4 630 (26.4)                                                  | 3 827 (26.6)                         | 3 312 (27.1)                          |
| Autumn                                                                    | 4 118 (23.5)                                                  | 3 356 (23.3)                         | 2 870 (23.5)                          |
| LUR modelled NO <sub>2</sub> exposure during pregnancy, µg/m <sup>3</sup> | 13.6 ± 6.9                                                    | 13.6 ± 6.9                           | 13.7 ± 6.9                            |

Numbers are n (%) or mean ± standard deviation

LRTI – lower respiratory tract infections; LUR – land use regression

<sup>a</sup>Missing data for maternal pre-pregnancy body mass index (BMI): baseline cohort 1 549 (8.8%), at 6 months 693 (4.8%), at 18 months 522 (4.3%).

European Union air quality standard for NO<sub>2</sub>: 1-year average 40 µg/m<sup>3</sup>

**Table 2.** Associations between pregnancy exposure to NO<sub>2</sub> and respiratory health of children by age 6 and 18 months.

|                                        | Crude   |         |                     | Adjusted |         |                     |
|----------------------------------------|---------|---------|---------------------|----------|---------|---------------------|
|                                        | N total | N cases | OR (95% CI)         | N total  | N cases | OR (95% CI)         |
| <b>Main analysis<sup>a</sup></b>       |         |         |                     |          |         |                     |
| LRTI 0-6 months                        | 13 886  | 653     | 0.84 (0.75 to 0.94) | 13 116   | 616     | 0.99 (0.83 to 1.19) |
| LRTI 6-18 months                       | 12 001  | 1 469   | 0.94 (0.86 to 1.01) | 11 412   | 1 388   | 1.06 (0.94 to 1.19) |
| Wheeze 6-18 months                     | 11 976  | 4 961   | 1.00 (0.95 to 1.06) | 11 387   | 4 712   | 0.99 (0.98 to 1.00) |
| <b>Stratified analysis<sup>b</sup></b> |         |         |                     |          |         |                     |
| <b>Oslo</b>                            |         |         |                     |          |         |                     |
| LRTI 0-6 months                        | 3 695   | 136     | 0.71 (0.50 to 1.02) | 3 530    | 128     | 0.75 (0.52 to 1.08) |
| LRTI 6-18 months                       | 3 246   | 351     | 0.83 (0.65 to 1.07) | 3 111    | 331     | 0.88 (0.68 to 1.14) |
| Wheeze 6-18 months                     | 3 248   | 1 315   | 1.10 (0.94 to 1.29) | 3 111    | 1 253   | 1.08 (0.92 to 1.28) |
| <b>Akershus</b>                        |         |         |                     |          |         |                     |
| LRTI 0-6 months                        | 6 014   | 281     | 1.23 (0.89 to 1.69) | 5 619    | 263     | 1.35 (0.97 to 1.88) |
| LRTI 6-18 months                       | 5 237   | 689     | 1.18 (0.95 to 1.45) | 4 939    | 649     | 1.18 (0.95 to 1.47) |
| Wheeze 6-18 months                     | 5 228   | 2 192   | 1.02 (0.88 to 1.18) | 4 930    | 2 066   | 1.03 (0.88 to 1.20) |
| <b>Bergen</b>                          |         |         |                     |          |         |                     |
| LRTI 0-6 months                        | 3 045   | 169     | 0.90 (0.69 to 1.17) | 2 899    | 161     | 0.98 (0.74 to 1.29) |
| LRTI 6-18 months                       | 2 560   | 318     | 1.00 (0.83 to 1.20) | 2 449    | 301     | 1.05 (0.86 to 1.27) |
| Wheeze 6-18 months                     | 2 548   | 1 073   | 1.00 (0.88 to 1.13) | 2 438    | 1 030   | 1.02 (0.89 to 1.16) |
| <b>Hordaland</b>                       |         |         |                     |          |         |                     |
| LRTI 0-6 months                        | 1 132   | 67      | 0.83 (0.47 to 1.49) | 1 068    | 64      | 0.92 (0.50 to 1.70) |
| LRTI 6-18 months                       | 958     | 111     | 1.36 (0.87 to 2.13) | 913      | 107     | 1.40 (0.88 to 2.23) |
| Wheeze 6-18 months                     | 952     | 381     | 1.35 (1.00 to 1.82) | 908      | 363     | 1.31 (0.96 to 1.79) |

Effect estimates per 10µg/m<sup>3</sup> NO<sub>2</sub>

LRTI – lower respiratory tract infections

<sup>a</sup>Adjusted for maternal age at delivery, maternal marital status, maternal education, sex of child, maternal prepregnancy BMI, smoking during pregnancy, parity, maternal atopy and study area.

<sup>b</sup>Adjusted for maternal age at delivery, maternal marital status, maternal education, sex of child, maternal prepregnancy BMI, smoking during pregnancy, parity, maternal atopy.

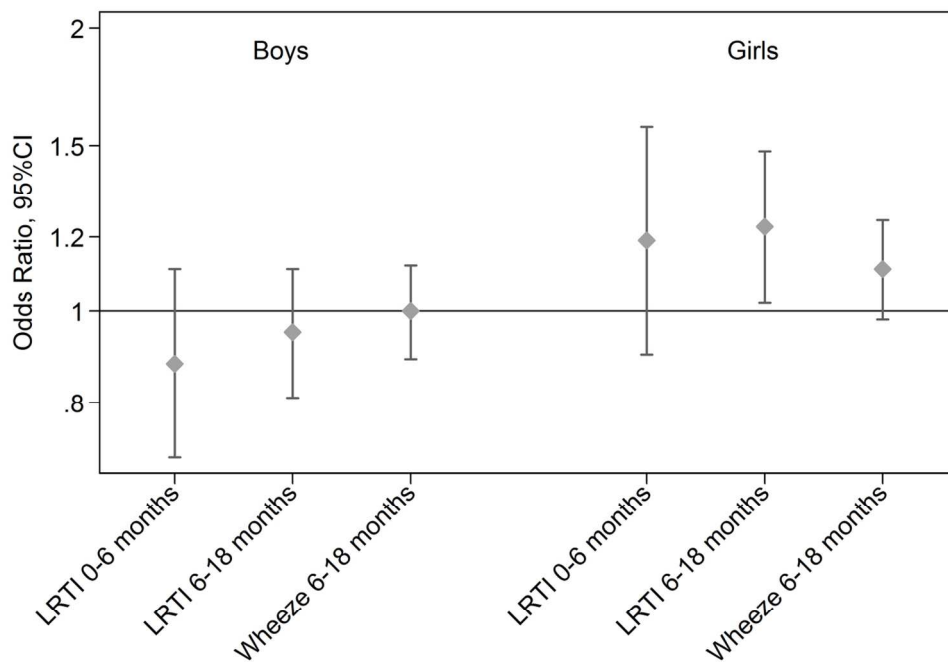

Figure 1 Stratified analysis by of the associations between pregnancy exposure to NO<sub>2</sub> and respiratory health of children by age 6 and 18 months. Odds ratio (OR) for lower respiratory tract infections (LRTI) and wheeze, adjusted for maternal age at delivery, maternal marital status, maternal education, maternal prepregnancy BMI, smoking during pregnancy, parity, maternal atopy and study area.

60x44mm (600 x 600 DPI)

view only

STROBE Statement—Checklist of items that should be included in reports of *cohort studies*

|                              | Item No | Recommendation                                                                                                                                                                                                                                                                                                                                                                                                                                            |
|------------------------------|---------|-----------------------------------------------------------------------------------------------------------------------------------------------------------------------------------------------------------------------------------------------------------------------------------------------------------------------------------------------------------------------------------------------------------------------------------------------------------|
| <b>Title and abstract</b>    | 1       | (a) Indicate the study's design with a commonly used term in the title or the abstract – <a href="#">page 1</a> .<br>(b) Provide in the abstract an informative and balanced summary of what was done and what was found – <a href="#">page 2</a> .                                                                                                                                                                                                       |
| <b>Introduction</b>          |         |                                                                                                                                                                                                                                                                                                                                                                                                                                                           |
| Background/rationale         | 2       | Explain the scientific background and rationale for the investigation being reported – <a href="#">page 4</a> .                                                                                                                                                                                                                                                                                                                                           |
| Objectives                   | 3       | State specific objectives, including any prespecified hypotheses – <a href="#">page 5</a> .                                                                                                                                                                                                                                                                                                                                                               |
| <b>Methods</b>               |         |                                                                                                                                                                                                                                                                                                                                                                                                                                                           |
| Study design                 | 4       | Present key elements of study design early in the paper – <a href="#">page 5</a> .                                                                                                                                                                                                                                                                                                                                                                        |
| Setting                      | 5       | Describe the setting, locations, and relevant dates, including periods of recruitment, exposure, follow-up, and data collection – <a href="#">page 5</a> .                                                                                                                                                                                                                                                                                                |
| Participants                 | 6       | (a) Give the eligibility criteria, and the sources and methods of selection of participants. Describe methods of follow-up – <a href="#">page 5</a> .<br>(b) For matched studies, give matching criteria and number of exposed and unexposed – <a href="#">N.A.</a>                                                                                                                                                                                       |
| Variables                    | 7       | Clearly define all outcomes, exposures, predictors, potential confounders, and effect modifiers. Give diagnostic criteria, if applicable – <a href="#">page 6 and 7</a> .                                                                                                                                                                                                                                                                                 |
| Data sources/<br>measurement | 8*      | For each variable of interest, give sources of data and details of methods of assessment (measurement). Describe comparability of assessment methods if there is more than one group – <a href="#">page 6 and 7</a> .                                                                                                                                                                                                                                     |
| Bias                         | 9       | Describe any efforts to address potential sources of bias – <a href="#">N.A.</a>                                                                                                                                                                                                                                                                                                                                                                          |
| Study size                   | 10      | Explain how the study size was arrived at – <a href="#">page 5</a> .                                                                                                                                                                                                                                                                                                                                                                                      |
| Quantitative variables       | 11      | Explain how quantitative variables were handled in the analyses. If applicable, describe which groupings were chosen and why – <a href="#">page 6</a> .                                                                                                                                                                                                                                                                                                   |
| Statistical methods          | 12      | (a) Describe all statistical methods, including those used to control for confounding – <a href="#">page 8</a> .<br>(b) Describe any methods used to examine subgroups and interactions – <a href="#">page 8</a> .<br>(c) Explain how missing data were addressed – <a href="#">page 7</a> .<br>(d) If applicable, explain how loss to follow-up was addressed – <a href="#">N.A.</a><br>(e) Describe any sensitivity analyses – <a href="#">page 8</a> . |
| <b>Results</b>               |         |                                                                                                                                                                                                                                                                                                                                                                                                                                                           |
| Participants                 | 13*     | (a) Report numbers of individuals at each stage of study—eg numbers potentially eligible, examined for eligibility, confirmed eligible, included in the study, completing follow-up, and analysed – <a href="#">page 5 and Table 1</a> .<br>(b) Give reasons for non-participation at each stage – <a href="#">page 5</a> .<br>(c) Consider use of a flow diagram – <a href="#">N.A.</a>                                                                  |
| Descriptive data             | 14*     | (a) Give characteristics of study participants (eg demographic, clinical, social) and information on exposures and potential confounders – <a href="#">page 8 and 9</a> .<br>(b) Indicate number of participants with missing data for each variable of interest – <a href="#">page 5</a> .<br>(c) Summarise follow-up time (eg, average and total amount) – <a href="#">page 5</a> .                                                                     |
| Outcome data                 | 15*     | Report numbers of outcome events or summary measures over time – <a href="#">page 8 and Table 1</a> .                                                                                                                                                                                                                                                                                                                                                     |
| Main results                 | 16      | (a) Give unadjusted estimates and, if applicable, confounder-adjusted estimates and                                                                                                                                                                                                                                                                                                                                                                       |

|                          |    |                                                                                                                                                                                                       |
|--------------------------|----|-------------------------------------------------------------------------------------------------------------------------------------------------------------------------------------------------------|
|                          |    | their precision (eg, 95% confidence interval). Make clear which confounders were adjusted for and why they were included – <a href="#">pages 8-9, Figure 1 and Tables 2-3.</a>                        |
|                          |    | (b) Report category boundaries when continuous variables were categorized – <a href="#">page 8 and 9.</a>                                                                                             |
|                          |    | (c) If relevant, consider translating estimates of relative risk into absolute risk for a meaningful time period – <a href="#">N.A.</a>                                                               |
| Other analyses           | 17 | Report other analyses done—eg analyses of subgroups and interactions, and sensitivity analyses – <a href="#">page 9.</a>                                                                              |
| <b>Discussion</b>        |    |                                                                                                                                                                                                       |
| Key results              | 18 | Summarise key results with reference to study objectives – <a href="#">page 9.</a>                                                                                                                    |
| Limitations              | 19 | Discuss limitations of the study, taking into account sources of potential bias or imprecision. Discuss both direction and magnitude of any potential bias – <a href="#">page 11.</a>                 |
| Interpretation           | 20 | Give a cautious overall interpretation of results considering objectives, limitations, multiplicity of analyses, results from similar studies, and other relevant evidence – <a href="#">page 11.</a> |
| Generalisability         | 21 | Discuss the generalisability (external validity) of the study results – <a href="#">page 10-11.</a>                                                                                                   |
| <b>Other information</b> |    |                                                                                                                                                                                                       |
| Funding                  | 22 | Give the source of funding and the role of the funders for the present study and, if applicable, for the original study on which the present article is based – <a href="#">page 12.</a>              |

\*Give information separately for exposed and unexposed groups.

**Note:** An Explanation and Elaboration article discusses each checklist item and gives methodological background and published examples of transparent reporting. The STROBE checklist is best used in conjunction with this article (freely available on the Web sites of PLoS Medicine at <http://www.plosmedicine.org/>, Annals of Internal Medicine at <http://www.annals.org/>, and Epidemiology at <http://www.epidem.com/>). Information on the STROBE Initiative is available at <http://www.strobe-statement.org>.



# BMJ Open

## Pregnancy exposure to air pollution and early childhood respiratory health in the Norwegian Mother and Child Cohort Study (MoBa)

|                                 |                                                                                                                                                                                                                                                                                                                                                                                                                                                                                                                                                                                                                                                                                                                                                                                                                                                                                |
|---------------------------------|--------------------------------------------------------------------------------------------------------------------------------------------------------------------------------------------------------------------------------------------------------------------------------------------------------------------------------------------------------------------------------------------------------------------------------------------------------------------------------------------------------------------------------------------------------------------------------------------------------------------------------------------------------------------------------------------------------------------------------------------------------------------------------------------------------------------------------------------------------------------------------|
| Journal:                        | <i>BMJ Open</i>                                                                                                                                                                                                                                                                                                                                                                                                                                                                                                                                                                                                                                                                                                                                                                                                                                                                |
| Manuscript ID                   | bmjopen-2016-015796.R1                                                                                                                                                                                                                                                                                                                                                                                                                                                                                                                                                                                                                                                                                                                                                                                                                                                         |
| Article Type:                   | Research                                                                                                                                                                                                                                                                                                                                                                                                                                                                                                                                                                                                                                                                                                                                                                                                                                                                       |
| Date Submitted by the Author:   | 24-Apr-2017                                                                                                                                                                                                                                                                                                                                                                                                                                                                                                                                                                                                                                                                                                                                                                                                                                                                    |
| Complete List of Authors:       | Madsen, Christian; Nasjonalt folkehelseinstitutt, Department of Health and Inequality<br>Håberg, Siri; Nasjonalt folkehelseinstitutt, Domain for Mental and Physical Health<br>Magnus, Maria; Nasjonalt folkehelseinstitutt, Department of Chronic Diseases<br>Aamodt, Geir; Norwegian University of Life Sciences, Department of Landscape Architecture and Spatial Planning<br>Stigum, Hein; Norwegian Institute of Public Health, Department of Chronic Diseases; University of Oslo, Department of Community Medicine and Global Health<br>London, Stephanie J.; National Institute of Environmental Health Sciences, Epidemiology<br>Nystad, Wenche; Nasjonalt folkehelseinstitutt, Department of Chronic Diseases<br>Nafstad, Per; Nasjonalt folkehelseinstitutt, Department of Chronic Diseases; University of Oslo, Department of Community Medicine and Global Health |
| <b>Primary Subject Heading</b>: | Epidemiology                                                                                                                                                                                                                                                                                                                                                                                                                                                                                                                                                                                                                                                                                                                                                                                                                                                                   |
| Secondary Subject Heading:      | Reproductive medicine                                                                                                                                                                                                                                                                                                                                                                                                                                                                                                                                                                                                                                                                                                                                                                                                                                                          |
| Keywords:                       | air pollution, NO2, pregnancy, lower respiratory tract infections, wheezing, The Norwegian Mother and Child Cohort Study                                                                                                                                                                                                                                                                                                                                                                                                                                                                                                                                                                                                                                                                                                                                                       |
|                                 |                                                                                                                                                                                                                                                                                                                                                                                                                                                                                                                                                                                                                                                                                                                                                                                                                                                                                |

SCHOLARONE™  
Manuscripts

1  
2  
3 **Pregnancy exposure to air pollution and early childhood respiratory health**  
4  
5 **in the Norwegian Mother and Child Cohort Study (MoBa)**  
6  
7  
8  
9

10 Christian Madsen<sup>a</sup>, Siri Eldevik Håberg<sup>a</sup>, Maria C. Magnus<sup>a</sup>, Geir Aamodt<sup>b</sup>, Hein Stigum<sup>a,c</sup>, Stephanie  
11 J. London<sup>d</sup>, Wenche Nystad<sup>a</sup>, Per Nafstad<sup>a,c</sup>  
12  
13

14  
15  
16 <sup>a</sup> Domain for Mental and Physical Health, Norwegian Institute of Public Health, Oslo, Norway  
17

18 <sup>b</sup> Department of Landscape Architecture and Spatial Planning, Norwegian University of Life Sciences,  
19 Ås, Norway  
20

21  
22 <sup>c</sup> Department of Community Medicine and Global Health, Medical Faculty, University of Oslo, Oslo,  
23 Norway  
24

25  
26 <sup>d</sup> National Institute of Environmental Health Sciences, National Institutes of Health, Department of  
27 Health and Human Services, Research Triangle Park, North Carolina, USA  
28  
29  
30  
31  
32  
33  
34  
35  
36  
37  
38  
39  
40  
41  
42  
43  
44

45 Correspondence to:

46 Christian Madsen

47  
48 Tel. +4721078060

49  
50 E-mail: [christian.madsen@fhi.no](mailto:christian.madsen@fhi.no)  
51

52 Department of Health and Inequality,  
53

54 Domain for Mental and Physical Health,  
55

56 Norwegian Institute of Public Health,  
57  
58  
59  
60

P.O. Box 4404 Nydalen, N-0403 Oslo, Norway.

## Abstract

**Objectives** It is unclear whether maternal air pollution exposure during pregnancy induces changes in the developing respiratory system of a child and whether it has consequences for respiratory health in early childhood. We investigated associations between exposure to moderate levels of air pollution during pregnancy and early childhood lower respiratory tract infections (LRTI) and wheezing.

**Methods** This study used a sub-group of 17 533 participants in the Norwegian Mother and Child Cohort Study (MoBa). Air pollution levels at residential addresses were estimated using land use regression (LUR) models, and back-extrapolated to the period of each pregnancy. Information on LRTI and wheezing, and lifestyle factors was collected from questionnaires completed by mothers during pregnancy and when the child was 6 and 18 months of age.

**Results** Moderate levels of NO<sub>2</sub> (13.6 µg/m<sup>3</sup>, range 0.01 to 60.4) exposure at residential address during pregnancy were not statistically significant associated with LRTI before age 6 months (adjusted RR 0.99; 95% CI 0.84 to 1.17), LRTI between 6-18 months (adjusted RR 1.05; 95% CI 0.94 to 1.16) and wheezing 6-18 months (adjusted RR 1.02; 95% CI 0.97 to 1.07). Exploratory post hoc analysis indicated an increased risk for LRTIs 6 to 18 months in girls only (adjusted RR 1.20; 95% CI 1.02 to 1.46).

**Conclusions** There were no statistically significant associations for moderate levels of pregnancy NO<sub>2</sub> exposure and respiratory health outcomes during early childhood in overall analysis. However, post hoc analysis gave some support to the idea that girls may have higher risk for developing LRTI due to prenatal air pollution exposure.

**Strengths and limitations of this study**

- Large prospective cohort with data on lower respiratory tract infections, with additional linked data from medical birth registry.
- Land use regression modelled traffic exposure assessment at residential address using both spatial and temporal adjustment.
- Not able to identify trimester-specific time windows of exposure due to correlated exposures.
- No statistically significant associations for moderate levels exposure of NO<sub>2</sub> and respiratory health at early childhood in the overall analysis.

## Introduction

Lower respiratory tract infections (LRTI) are common in infants and young children.<sup>1</sup> They are caused primarily by viral pathogens and are clinically expressed as bronchiolitis, or pneumonia.<sup>1</sup> Childhood wheeze is a symptom of several heterogeneous conditions, and may occur during viral respiratory infections or be associated with atopy.<sup>2</sup> Infections and wheeze are also closely related in young children. Respiratory diseases in early childhood may have long term consequences, accounting for a significant proportion of adult lung disease.<sup>1,3</sup> Special attention should be given to modifiable factors that may influence lung development at crucial stages (prenatally and postnatally). Numerous epidemiologic studies have shown that children exposed to tobacco smoke or higher levels of ambient air pollution above recommended levels (e.g. standards from the EU or the WHO) are more prone to develop respiratory disorders.<sup>4-6</sup> Air pollution may affect the lungs by inducing low-grade systemic inflammation and oxidative stress,<sup>7</sup> leading to pathological changes in the respiratory system. Children are particularly susceptible due to the continuous development of lungs that takes place from embryogenesis to early adolescence,<sup>3,8</sup> and continuous immune system development.<sup>9</sup> Of particular interest is intrauterine exposure, where air pollution may indirectly affect the developing lung tissue of the foetus.<sup>10,11</sup>

A number of studies have reported association of maternal smoking during pregnancy with frequent respiratory tract infections, chronic bronchitis, wheezing, and asthma in children.<sup>12-14</sup> Maternal smoking is well-accepted as a risk factor for adverse birth outcomes and lends support for a role of outdoor air pollution on pregnancy outcomes.<sup>15</sup> Furthermore, maternal smoking during pregnancy has been identified as an independent risk factor for wheeze and LRTI in the children's first 18 months of life.<sup>16</sup> There is an emerging interest in whether exposure to ambient air pollution during pregnancy might influence respiratory health in early childhood.<sup>17</sup> Some studies report associations of prenatal air pollution exposure with respiratory infections and decreased lung function.<sup>18-20</sup> Other studies have found no such association for LRTI and lung function in early childhood.<sup>21,22</sup>

In this study, we investigated the associations between estimated exposure to traffic-related air pollution during pregnancy and early childhood respiratory health (LRTI and wheeze) in selected urban and county areas of Norway. Norway is characterized by relatively low levels of air pollution,<sup>23</sup>

1  
2  
3 and it is of interest whether low levels might interfere with intrauterine respiratory system  
4 development and affect respiratory health later in life.  
5  
6  
7

## 8 9 **Methods**

### 10 ***Study population***

11  
12 The Norwegian Mother and Child Cohort Study (MoBa) is a prospective population-based pregnancy  
13 cohort study conducted by the Norwegian Institute of Public Health.<sup>24</sup> Pregnant women were recruited  
14 from all over Norway from 1999 to 2008. Among invited women, 41% consented to participate.  
15 Mothers could participate with more than one child, resulting in 114 500 children and 95 200 mothers  
16 included in the cohort.  
17  
18  
19  
20  
21  
22

23 All participants living in our study areas (Oslo, Bergen, Akershus, and Hordaland) were  
24 eligible for our study (N=22 149, 23.3%). We excluded participants with missing NO<sub>2</sub> exposure  
25 information (N=3 876), multiple births (N=664) and non-live births (N=76). Only data on singleton  
26 live births were used in the analysis. Total number of participants from the four study areas was  
27 17 533 (79%). Pregnancy-related information was obtained from the Medical Birth Registry of  
28 Norway (MBRN).  
29  
30  
31  
32  
33  
34

35 Mothers participating in the MoBa study completed a number of questionnaires during follow-  
36 up. We used data on lifestyle characteristics from the first questionnaire completed at recruitment  
37 (approximately at week 17-18 of pregnancy) and another questionnaire completed at week 30 of  
38 pregnancy. Information on the respiratory outcomes was collected from maternal questionnaires  
39 completed when the child was 6 and 18 months of age. The children were born from 2001 to 2009, 14  
40 386 mothers had returned the questionnaire at 6 months, and 12 231 had returned the questionnaire at  
41 18 months (Table 1).  
42  
43  
44  
45  
46  
47  
48

49 The study was approved by the regional Ethics committee and the Norwegian Data  
50 Inspectorate. The current study is based on versions VI (pregnancy data) and VIII (respiratory  
51 outcomes) of the quality-assured data files released for research on the 15<sup>th</sup> April 2011 and on the 14<sup>th</sup>  
52 February 2014, respectively.  
53  
54  
55  
56  
57  
58  
59  
60

## 2.2 Outcomes and covariates

The outcomes were based on the maternal report from questionnaires filled when children were 6 and 18 months of age. LRTI are important health problems during early childhood, and include diagnosis of respiratory syncytial virus infection, bronchiolitis, bronchitis, or pneumonia. The outcomes were treated as dichotomous. Wheeze was defined as “wheezing/whistling in the chest” or “tightness in the chest” between 6 and 18 months of age.

The following characteristics were extracted from the MBRN: parity defined as number of previous deliveries (0; 1;  $\geq 2$ ), mother’s age at birth (years), marital status (married/cohabiting; other), sex of the child (boy; girl), and year of birth. Questionnaire information was used to determine: maternal education (less than high school; high school; up to 4 years of college; more than 4 years of college (master or professional degree)), maternal smoking during pregnancy (never; any smoking during pregnancy), maternal weight at the beginning of pregnancy (kg) and maternal height (m) were used to calculate body mass index (BMI) (maternal weight divided by squared maternal height), maternal atopy (ever having hay fever, pollen allergy, atopic dermatitis, allergy to animal hair, other types of allergy, or asthma).

Adjustment variables were selected based on literature analysis and included maternal age at delivery, maternal marital status, maternal education, sex of child, maternal pre-pregnancy BMI, parity, year of birth, smoking during pregnancy, maternal atopy, and area.

### *Air pollution exposure*

In this study, we used LUR modeled exposure to traffic-related pollutant NO<sub>2</sub> at the residential address at the time of delivery for women included in MoBa. Separate models were developed for four of the recruitment areas: the two biggest cities in Norway (Oslo and Bergen) and their surrounding counties (Akershus and Hordaland).<sup>25</sup>

Estimates of air pollution exposure during pregnancy were based on the methodology developed for the ESCAPE project.<sup>26 27</sup> Land use regression (LUR) models for NO<sub>2</sub> levels were built for each of the studied areas in order to account for regional specifics.<sup>25</sup> Sampling of air pollution is done retrospective since it was not part of the MoBa design. We measured the spatial distribution of

1  
2  
3 air pollution for Oslo and Akershus in 2010, and for Bergen and Hordaland in 2011. Measurement  
4 campaigns included three rounds of approximately two weeks duration with NO<sub>2</sub> measurements  
5 (during winter, summer and an intermediate season) within a one year period. Measurement sites were  
6 selected to represent the range of residential exposure for each study area. In the analysis, we included  
7 sites with no missing data, and no geocoding mismatches.<sup>25</sup> The models provided adjusted  $R^2$  in the  
8 range of 55 – 85 %, and more details of these models is described elsewhere.<sup>25</sup>

9  
10  
11  
12  
13  
14  
15 LUR models were built separately for Oslo and Akershus. Only one model was built for the  
16 whole Hordaland County (including the city Bergen) due to a low number of valid measurement sites  
17 outside Bergen. Predictors for building the LUR model were obtained from a geographical information  
18 system (GIS) analysis of the N50 and VBASE maps (received in February 2013) providing  
19 information on land use, residential density, types of landscape and road network information. We  
20 built multiple linear regression models and performed diagnostic model tests according to the method  
21 described by Beelen and colleagues.<sup>26</sup>

22  
23  
24  
25  
26  
27  
28  
29  
30  
31  
32  
33  
34  
35  
36  
37  
38  
39  
40  
41  
42  
43  
44  
45  
46  
47  
48  
49  
50  
51  
52  
53  
54  
55  
56  
57  
58  
59  
60  
Yearly means of air pollution levels at residential address at birth were estimated using the  
resulting LUR models. Variables in models were truncated in accordance to the range of  
corresponding variables used for LUR model building. Negative modelled values were replaced with  
0.01 to avoid the unlikely scenario of negative modelled exposure and keep these in the analysis as  
low exposed addresses.<sup>25</sup> The true exposure from NO<sub>2</sub> at these addresses are most likely at the low end  
of the scale. In order to account for temporal variability, we used the ratio method of back-  
extrapolation to the period of each pregnancy using continuous routine monitoring station data.<sup>27</sup> Daily  
NO<sub>2</sub> measurements were obtained from the Norwegian Institute for Air Research database  
“Luftkvalitet.info” for the period 2000 - 2012 in Oslo (used for Oslo and Akershus), and for the period  
2003 - 2012 in Bergen (used for Bergen and Hordaland). Daily estimates of exposure were calculated  
using the ratio method of back-extrapolation: the LUR-modelled yearly estimate multiplied by the  
ratio between daily NO<sub>2</sub> routine monitoring station measurement and an annual average for the year  
when LUR measurement campaign took place. Daily NO<sub>2</sub> exposure estimates were averaged  
separately for 1<sup>st</sup>, 2<sup>nd</sup>, and 3<sup>rd</sup> trimester, and also over the whole pregnancy. Exposures by trimester and



1  
2  
3 the whole pregnancy exposure were highly correlated and we therefore decided to use only the  
4  
5 average NO<sub>2</sub> exposure during the whole pregnancy as our exposure estimate.  
6  
7

### 8 9 *Statistical analysis*

10 Generalized linear models was fitted to evaluate the associations between pregnancy NO<sub>2</sub> exposure  
11 and respiratory outcomes. Results are presented for crude and adjusted models as risk ratios (RR).  
12  
13 Multiplicative interactions were tested in the adjusted models between the continuous NO<sub>2</sub> pregnancy  
14 exposure variable and the following categorical variables: area, sex, parity, birth season and maternal  
15 atopy.  
16  
17

18  
19  
20 Sensitivity analyses were performed by a) restricting the analysis to women who did not  
21 change address during pregnancy, and b) restricting the analysis to pregnancies during the last period  
22 (2006-2008) of the MoBa recruitment, thus closer in time to the exposure campaign and GIS-  
23 variables.  
24  
25

26  
27  
28 Area variable was defined by the location of the address at delivery: Oslo, Akershus, Bergen  
29 and Hordaland. This variable is included in the adjusted models since it previously has been reported  
30 to be a potential proxy for unmeasured factors that could vary between each study area and thus could  
31 influence the outcome variables within each separate area.<sup>25</sup> Still, area may also reflect the spatial  
32 distribution of air pollution, and thus result in overadjustment bias on the path between exposure and  
33 outcome.<sup>28</sup> We therefore performed a separate post hoc analysis by excluding the area variable from  
34 the adjusted model. In addition, we performed exploratory analyses post hoc by area, sex of child,  
35 parity, season of birth, and maternal atopy.  
36  
37  
38

39  
40  
41 We used ArcGIS10.1 software (Esri, CA, USA) for GIS analyses; statistical analyses were  
42 performed using STATA 13.0 (StataCorp, Texas, USA).  
43  
44  
45

### 46 47 48 49 50 51 **Results**

52 The study population included in this study consisting of participants from the four study areas of  
53 Norway with pregnancy air pollution exposure data had similar characteristics as the whole MoBa  
54 cohort study with information from 6 months and at 18 months (Table 1). A total of 4.5% of children  
55  
56  
57  
58  
59  
60

1  
2  
3 had LRTI at 6 months, and 12% of children had LRTI and 40.6% had wheezing symptoms between 6  
4  
5 and 18 months.

6  
7 The majority (86.7%) of the women did not change address during pregnancy. Maternal  
8  
9 smoking in pregnancy was relatively uncommon (6.2%). Maternal atopy was reported in 33.1% of the  
10  
11 women (Table 1). The distribution of the study population across birth seasons reflects the timing of  
12  
13 recruitment into MoBa and we therefore observe slight deviation from the equal seasonal distribution.

14  
15 Mean NO<sub>2</sub> exposure during whole pregnancy was  $13.6 \pm 6.9 \mu\text{g}/\text{m}^3$  NO<sub>2</sub>, which is well below  
16  
17 the European Union air quality yearly average standard of  $40 \mu\text{g}/\text{m}^3$  NO<sub>2</sub>. The range of NO<sub>2</sub> spanned  
18  
19 from 0.01 thru  $60.4 \mu\text{g}/\text{m}^3$ , with a total of 27 children with concentrations equal or above  $40 \mu\text{g}/\text{m}^3$  at  
20  
21 their residential address.

22  
23 We found no associations of NO<sub>2</sub> exposure during pregnancy with LRTI at 6 months, LRTI at  
24  
25 6-18 months, or wheeze at 6-18 months in the overall analysis (Table 3). The main covariates affecting  
26  
27 the change in significance of risk ratio estimate from the crude to the adjusted models were parity and  
28  
29 area. In the stratified analysis by area we observed a consistent pattern, although not statistically  
30  
31 significant, of positive associations for LRTI and wheeze for participants living outside big cities, in  
32  
33 Akershus and Hordaland (Table 3).

34  
35 A stratified analysis post hoc, showed a consistent tendency for association of pregnancy NO<sub>2</sub>  
36  
37 exposure with LRTI and wheeze in girls, but not in boys. For instance, the risk of developing LRTI 6-  
38  
39 18 months in girls was equal to an RR = 1.20 (95% CI 1.02 to 1.42, p=0.03) per each  $10\mu\text{g}/\text{m}^3$  increase  
40  
41 in NO<sub>2</sub> exposure during pregnancy. Stratified analysis post hoc by maternal atopy status and birth  
42  
43 season did not identify any important differences between the groups. No statistically significant  
44  
45 interactions were detected between NO<sub>2</sub> exposure and maternal atopy, sex of child, area, birth season,  
46  
47 or parity. Sensitivity analyses resulted in no substantial changes compared to the reported results.  
48  
49 Excluding from the adjustment set the area variable, as a factor potentially reflecting spatial  
50  
51 distribution of air pollution, did not considerably change the results. Restricting the analysis to  
52  
53 pregnancies during the last period of the MoBa recruitment (2006-2008) did not result in substantial  
54  
55 changes to the reported results.  
56  
57  
58  
59  
60

## Discussion

In this study, we found no statistically significant associations for pregnancy NO<sub>2</sub> exposure to traffic-related air pollution exposure at residential address at birth and LRTI or wheeze in early childhood.

A previously study by Esplugues and colleagues has reported similar results of no association between LUR-modelled prenatal NO<sub>2</sub> exposure (with higher than in our study whole pregnancy mean NO<sub>2</sub> values of 39.1µg/m<sup>3</sup>) with LRTI or persistent cough during the 1<sup>st</sup> year of life, but they did report an association between postnatal NO<sub>2</sub> exposure and persistent cough.<sup>22</sup> In the large international ESCAPE study, uniting cohorts from Germany, Sweden, Netherlands, and the UK, decrease in lung function parameters has been associated with exposure to LUR-modelled annual average NO<sub>2</sub>, NO<sub>x</sub>, PM<sub>2.5</sub> absorbance, and PM<sub>2.5</sub> at current address at 6 - 8 years of age, but not at birth address.<sup>29</sup>

In post hoc analysis, we found a sex difference in prenatal NO<sub>2</sub> exposure association with LRTI: the association was present in girls, but not in boys. Male sex is a known risk factor for both respiratory infections and wheezing in childhood.<sup>2 30 31</sup> However, the interaction between environmental exposures and prenatal lung development in boys and girls remains uncertain,<sup>32</sup> and our finding was from one of several subsample analyses. There are differences in prenatal anatomic and physiological respiratory system development in sexes, as well as different sex-hormone effects on the immune system functioning.<sup>32-34</sup> As was reviewed by Casimir and colleagues, while boys outnumber girls in acute respiratory infections, the chronicity of inflammatory process has more adverse effects on girls than on boys.<sup>35</sup> Given the chronic low-grade systemic inflammation associated with air pollution exposure,<sup>7</sup> we might expect more adverse effect in girls. However, this issue is insufficiently studied, and the existing reports give contradictory results. The international ESCAPE study reported stronger effects of air pollution exposure during the first year of life, which was LUR-modelled at birth address, on pneumonia in girls.<sup>6</sup>

We found some indication of different patterns for associations between prenatal air pollution exposure and early respiratory health in study participants living in cities versus counties outside cities. Living in non-urban areas was overall associated with higher risk of developing LRTI and wheeze, although the estimates were not statistically significant. This might be due to a higher misclassification of exposure in cities because of higher mobility (change of residential address), or

1  
2  
3 due to other types of pollutants in non-urban areas.<sup>36</sup> A study by Canfield and colleagues (2006)  
4 reported higher mobility for nulliparous women as compared to women with several children. They  
5 explained this as related to the need for larger homes due to expecting a child (first born) and a need to  
6 live closer to health care facilities.<sup>37</sup> A previous study from Norway reported that half of the mothers  
7 work during pregnancy and that no difference was found when comparing using only home address to  
8 a weighted exposure of home and work address exposure.<sup>38</sup> On the other hand, non-city population  
9 might have more homogenous exposure and spending more time close to home. Difference in  
10 distribution of socioeconomic factors or parity might play a role: families with several children tend to  
11 move out of large cities in Norway. Familiar predisposition to allergic disorders may be an important  
12 factor in modifying the effect of tobacco smoke exposure on wheezing.<sup>33</sup> Certain months of birth, due  
13 to their correlation with viral infections seasons, can be a risk factor for wheezing and LRTI.<sup>2,31</sup> Our  
14 study found no differences in the effect from groups divided by maternal atopy status or birth season.

15  
16  
17  
18  
19  
20  
21  
22  
23  
24  
25  
26  
27 Our study applied standardized individual exposure assessment for the large study population,  
28 and detailed information on potential confounders was collected from prenatal questionnaires.  
29  
30  
31  
32  
33  
34  
35  
36  
37  
38  
39  
40  
41  
42  
43  
44  
45  
46  
47  
48  
49  
50  
51  
52  
53  
54  
55  
56  
57  
58  
59  
60  
Estimates for prenatal exposure to NO<sub>2</sub> were based on LUR models and temporal back-extrapolation  
of exposure during entire pregnancy at the address at birth. The NO<sub>2</sub> exposure was collected during  
2010 and 2011, and the GIS-variables used in the modelling were collected in 2013. The modelled  
exposures at each address were back-extrapolated using fixed 24-hour monitoring data from each area  
in the period 1999-2009. Such estimates might be a subject to non-differential misclassification of  
exposure due to changes in GIS-variables, or differences in the participant's mobility and lifestyle  
factors. However, results of the sensitivity analysis only in women who did not change address during  
pregnancy were similar to the overall analysis. Likewise, restricting the analysis to pregnancies during  
the last period, closer in time to the collected exposure variables and GIS-variables, did not result in  
different associations than the overall analysis.

In epidemiological studies investigating air pollution effects, precision of exposure estimation  
is an important challenge. It is usually not feasible to sample personal air pollution exposure in large  
birth cohorts, mainly due to the amount of participants needed and due to the fact of not having  
information about the pregnancy before week 17. It has therefore become increasingly common to

1  
2  
3 apply modelling of air pollution exposure at individual residential addresses, such as dispersion  
4  
5 models and LUR models. High correlations have previously been reported between indoor and  
6  
7 outdoor concentrations of NO<sub>2</sub>,<sup>39</sup> and NO<sub>2</sub> is also reported to display higher spatial variation as  
8  
9 compared to other pollutants,<sup>40</sup> thus making it a better proxy for individual air pollution exposure.

10  
11 The mean air pollution exposure levels explored in this study may be relatively low for  
12  
13 detecting the association between prenatal exposure and postnatal respiratory health, and the reported  
14  
15 effect estimates might be biased towards null due to non-differential misclassification of exposure. It  
16  
17 could also be difficult to disentangle prenatal and early postnatal exposure to air pollution if family  
18  
19 continues to live at the same address at these two periods. Prenatal exposures need to be carefully  
20  
21 studied for identifying potential critical windows of exposure. In our data, exposures by trimester were  
22  
23 highly correlated with whole pregnancy exposure, and therefore we only assessed the exposure during  
24  
25 entire pregnancy. More studies are needed for exploring the causative association between prenatal air  
26  
27 pollution exposure and respiratory health early in childhood, for characterizing critical time windows  
28  
29 and main pollutants that are involved in pathological changes. Of interest for future research is the sex  
30  
31 difference in prenatal exposure effect identified in our study.

32  
33 In this large Norwegian pregnancy cohort we found no statistically significant associations for  
34  
35 moderate levels of exposure to NO<sub>2</sub> during pregnancy and childhood respiratory health measured by  
36  
37 LRTI and wheeze.

38  
39  
40  
41 **Acknowledgements:** The co-authors would like to express gratitude to all MoBa cohort participants  
42  
43 and research team, to Sviatlana Panasevich and Jon Wickmann at NIPH for their help with the  
44  
45 database management, and to the Norwegian Institute for Air Research team for providing valuable  
46  
47 research data thru their national air quality database. The authors also wants to thank the reviewers for  
48  
49 their valuable comments.

50  
51  
52  
53 **Contribution to authorship:** PN, SJL, WN, PM were involved in conception, hypothesis delineation  
54  
55 and study design. SJL, GA, SEH, CM contributed to the exposure assessment. CM and PN drafted the  
56  
57  
58  
59  
60

1  
2  
3 manuscript. All authors were involved in data interpretation and approved the final submitted version  
4  
5 of the manuscript.  
6  
7

8  
9 **Funding:** The Norwegian Mother and Child Cohort Study is supported by the Norwegian Ministry of  
10 Health and the Ministry of Education and Research, NIH/NIEHS (contract no N01-ES-75558),  
11 NIH/NIDS (grant no.1 UO1NS 047537-01 and grant no.2 UO1 NS 047537-06A1). This study was  
12 also supported by the Research Council of Norway (grant no.196102) and the Intramural Research  
13 Program of the NIH, National Institute of Environmental Health Sciences (project number Z01  
14 ES49019).  
15  
16  
17  
18  
19  
20  
21  
22

23 **Details of ethics approval:** The Norwegian Mother and Child Cohort Study has approvals from the  
24 Regional Ethics Committee and the Norwegian Data Inspectorate. The current study is based on  
25 version VI of the quality-assured data files released for research on the 15<sup>th</sup> April 2011.  
26  
27  
28  
29

30  
31 **Data sharing statement:** Technical description of the MoBa data can be found at the study website  
32 (<https://www.fhi.no/en/studies/moba/>). Researchers can apply for access to the dataset  
33 (<https://www.fhi.no/en/more/research--access-to-data/>). Statistical code is available upon request from  
34 the corresponding author.  
35  
36  
37  
38  
39

40  
41 **Competing interests:** none declared.  
42  
43  
44

## 45 46 References

- 47 1. Graham NM. The epidemiology of acute respiratory infections in children and adults: a global  
48 perspective. *Epidemiol Rev* 1990;12:149-178.  
49
- 50 2. Sherriff A, Peters TJ, Henderson J, *et al*. Risk factor associations with wheezing patterns in  
51 children followed longitudinally from birth to 3(1/2) years. *Int J Epidemiol* 2001;30:1473-  
52 1484.  
53  
54  
55  
56  
57  
58  
59  
60

- 1  
2  
3 3. Merkus PJ. Effects of childhood respiratory diseases on the anatomical and functional  
4 development of the respiratory system. *Paediatr Respir Rev*, 2003;4:28-39.
- 5  
6  
7 4. Carlsen KH, Carlsen KC. Respiratory effects of tobacco smoking on infants and young  
8 children. *Paediatr Respir Rev*, 2008;9:11-20.
- 9  
10  
11 5. Goldizen FC, Knibbs LD, Sly PD. Respiratory effects of air pollution on children. *Pediatr*  
12 *Pulmonol* 2016;51:94-108.
- 13  
14  
15 6. MacIntyre EA, Gehring U, Molter A, *et al*. Air pollution and respiratory infections during  
16 early childhood: an analysis of 10 European birth cohorts within the ESCAPE Project.  
17 *Environ Health Perspect* 2014;122:107-113.
- 18  
19  
20  
21 7. Brook RD, Rajagopalan S, Pope CA, *et al*. Particulate matter air pollution and cardiovascular  
22 disease: An update to the scientific statement from the American Heart Association.  
23 *Circulation* 2010;121:2331-2378.
- 24  
25  
26  
27 8. Pinkerton KE, Joad JP. Influence of air pollution on respiratory health during perinatal  
28 development. *Clin Exp Pharmacol Physiol* 2006;33:269-272.
- 29  
30  
31  
32 9. Goenka A, Kollmann TR. Development of immunity in early life. *J Infect* 2015;71:S112-120.
- 33  
34  
35 10. Nelly D, Plusquin M, xx, *et al*. In Utero Fine Particle Air Pollution and Placental Expression  
36 of Genes in the Brain-Derived Neurotrophic Factor Signaling Pathway: An ENVIRONAGE  
37 Birth Cohort Study. *Environ Health Perspect* 2015;123:834-840.
- 38  
39  
40 11. Veras MM, Damaceno-Rodrigues NR, Caldini EG, *et al*. Particulate Urban Air Pollution  
41 Affects the Functional Morphology of Mouse Placenta. *BIOLOGY OF REPRODUCTION*  
42 2008;79:578-584.
- 43  
44  
45 12. Burke H, Leonardi-Bee J, Hashim A, *et al*. Prenatal and passive smoke exposure and  
46 incidence of asthma and wheeze: systematic review and meta-analysis. *Pediatrics*  
47 2012;129:735-744.
- 48  
49  
50  
51 13. Jaakkola JJ, Kosheleva AA, Katsnelson BA, *et al*. Prenatal and postnatal tobacco smoke  
52 exposure and respiratory health in Russian children. *Respir Res* 2006;7:48.
- 53  
54  
55  
56 14. Ruskamp J, Smit H, Rovers M, *et al*. Neonatal total IgE and respiratory tract infections in  
57 children with intrauterine smoke exposure. *Arch Dis Child* 2010;95:427-431.
- 58  
59  
60

- 1  
2  
3 15. Cheraghi M, Salvi S. Environmental tobacco smoke (ETS) and respiratory health in children.  
4  
5 *European Journal of Pediatrics*, 2009;168(8):897-905.  
6
- 7 16. Haberg SE, Stigum H, Nystad W, *et al.* Effects of pre- and postnatal exposure to parental  
8  
9 smoking on early childhood respiratory health. *Am J Epidemiol* 2007;166:679-686.  
10
- 11 17. Proietti E, Roosli M, Frey U, *et al.* Air Pollution During Pregnancy and Neonatal Outcome: A  
12  
13 Review. *Journal of Aerosol Medicine and Pulmonary Drug Delivery* 2013;26:9-23.  
14
- 15 18. Vieira SE. The health burden of pollution: the impact of prenatal exposure to air pollutants. *Int*  
16  
17 *J Chron Obstruct Pulmon Dis* 2015;10:1111-1121.  
18
- 19 19. Jedrychowski WA, Perera FP, Mauger U, *et al.* Effect of prenatal exposure to fine particulate  
20  
21 matter on ventilatory lung function of preschool children of non-smoking mothers. *Paediatr*  
22  
23 *Perinat Epidemiol* 2010;24:492-501.  
24
- 25 20. Jedrychowski WA, Perera P, Spengler JD, *et al.* Intrauterine exposure to fine particulate  
26  
27 matter as a risk factor for increased susceptibility to acute broncho-pulmonary infections in  
28  
29 early childhood. *Int J Hyg Environ Health* 2013;216:395-401.  
30
- 31 21. Rice MB, Rifas-Shiman SL, Oken E, *et al.* Exposure to traffic and early life respiratory  
32  
33 infection: A cohort study. *Pediatr Pulmonol* 2014;50:252-259.  
34
- 35 22. Esplugues A, Ballester F, Estarlich M, *et al.* Outdoor, but not indoor, nitrogen dioxide  
36  
37 exposure is associated with persistent cough during the first year of life. *Sci Total Environ*,  
38  
39 2011;409:4667-4673.  
40
- 41 23. Fischer PH, Hoek G, van Reeuwijk H, Briggs DJ, *et al.* Traffic-related differences in outdoor  
42  
43 and indoor concentrations of particles and volatile organic compounds in Amsterdam. *Atmos*  
44  
45 *Environ*, 2000;34:3713-3722.  
46
- 47 24. Magnus P, Birke C, Vejrup K, *et al.* Cohort Profile Update: The Norwegian Mother and Child  
48  
49 Cohort Study (MoBa). *Int J Epidemiol* 2016;45:382-388.  
50
- 51 25. Panasevich S, Håberg SE, Aamodt G, *et al.* Association between pregnancy exposure to air  
52  
53 pollution and birth weight in selected areas of Norway. *Archives of Public Health* 2016;74:26.  
54  
55  
56  
57  
58  
59  
60



- 1  
2  
3 26. Beelen R, Hoek G, Vienneau D, *et al.* Development of NO<sub>2</sub> and NO<sub>x</sub> land use regression  
4 models for estimating air pollution exposure in 36 study areas in Europe - The ESCAPE  
5 project. *Atmospheric Environment* 2013;72:10-23.  
6  
7
- 8  
9 27. Pedersen M, Giorgis-Allemand L, Bernard C, *et al.* Ambient air pollution and low  
10 birthweight: a European cohort study (ESCAPE). *Lancet Respir Med* 2013;1:695-704.  
11  
12
- 13 28. Schisterman EF, Cole SR, Platt RW. Overadjustment Bias and Unnecessary Adjustment in  
14 Epidemiologic Studies. *Epidemiology*, 2009;20(4):488-495.  
15  
16
- 17 29. Gehring U, Gruzieva O, Agius RM, *et al.* Air pollution exposure and lung function in  
18 children: the ESCAPE project. *Environ Health Perspect* 2013;121:1357-1364.  
19  
20
- 21 30. Herr M, Just J, Nikasinovic L, *et al.* Influence of host and environmental factors on wheezing  
22 severity in infants: findings from the PARIS birth cohort. *Clin Exp Allergy* 2012;42:275-283.  
23  
24
- 25 31. Simoes EA. Environmental and demographic risk factors for respiratory syncytial virus lower  
26 respiratory tract disease. *J Pediatr* 2003;143:S118-126.  
27  
28
- 29 32. Postma DS. Gender differences in asthma development and progression. *Gend Med*  
30 2007;4:S133-146.  
31  
32
- 33 33. Muenchhoff M, Goulder PJ. Sex differences in pediatric infectious diseases. *J Infect Dis*  
34 2014;209:S120-126.  
35  
36
- 37 34. Uekert SJ, Akan G, Evans MD, *et al.* Sex-related differences in immune development and the  
38 expression of atopy in early childhood. *J Allergy Clin Immunol* 2006;118:1375-1381.  
39  
40
- 41 35. Casimir GJ, Lefevre N, Corazza F, *et al.* Sex and inflammation in respiratory diseases: a  
42 clinical viewpoint. *Biol Sex Differ* 2013;4:16.  
43  
44
- 45 36. Miyake Y, Tanaka K, Fujiwara H, *et al.* Residential proximity to main roads during pregnancy  
46 and the risk of allergic disorders in Japanese infants: the Osaka Maternal and Child Health  
47 Study. *Pediatr Allergy Immunol* 2010;21:22-28.  
48  
49
- 50 37. Canfield MA, Ramadhani TA, Langlois PH, *et al.* Residential mobility patterns and exposure  
51 misclassification in epidemiologic studies of birth defects. *J Sci Environ Epidemiol*,  
52 2006;16:538-543.  
53  
54  
55  
56  
57  
58  
59  
60

- 1  
2  
3 38. Madsen C, Gehring U, Walker SE, *et al.* Ambient air pollution exposure, residential mobility  
4 and term birth weight in Oslo, Norway. *Environmental Research*, 2010;110:363-371.  
5  
6  
7 39. Cyrus J, Heinrich J, Richter K, Wolke G, *et al.* Sources and concentrations of indoor nitrogen  
8 dioxide in Hamburg (west Germany) and Erfurt (west Germany). *Sci Total Environ*,  
9 2000;250:51-62.  
10  
11  
12  
13 40. Cyrus J, Eeftens M, Heinrich J, Ampe C, *et al.* Variation of NO<sub>2</sub> and NO<sub>x</sub> concentrations  
14 between and within 36 European study areas: Results from the ESCAPE study. *Atmos*  
15 *Environ*, 2012;62:374-390.  
16  
17  
18  
19  
20  
21  
22  
23  
24  
25  
26  
27  
28  
29  
30  
31  
32  
33  
34  
35  
36  
37  
38  
39  
40  
41  
42  
43  
44  
45  
46  
47  
48  
49  
50  
51  
52  
53  
54  
55  
56  
57  
58  
59  
60

**Table 1.** Descriptive statistics for study participants from the MOBA cohort.

|                                                              | Baseline cohort at birth with NO <sub>2</sub> data (N=17 533) | Questionnaire at 6 months (N=14 386) | Questionnaire at 18 months (N=12 231) |
|--------------------------------------------------------------|---------------------------------------------------------------|--------------------------------------|---------------------------------------|
| Oslo                                                         | 4 669 (26.6)                                                  | 3 801 (26.4)                         | 3 320 (27.1)                          |
| Akershus                                                     | 7 554 (43.1)                                                  | 6 284 (43.7)                         | 5 350 (43.7)                          |
| Bergen                                                       | 3 869 (22.1)                                                  | 3 135 (21.8)                         | 2 591 (21.2)                          |
| Hordaland                                                    | 1 441 (8.2)                                                   | 1 166 (8.1)                          | 970 (7.9)                             |
| LRTI0- 6 months                                              |                                                               | 653 (4.5)                            |                                       |
| Missing                                                      |                                                               | 500 (3.5)                            |                                       |
| LRTI 6- 18 months                                            |                                                               |                                      | 1 469 (12.0)                          |
| Missing                                                      |                                                               |                                      | 230 (1.9)                             |
| Wheeze 6- 18 months                                          |                                                               |                                      | 4 961 (40.6)                          |
| Missing                                                      |                                                               |                                      | 255 (2.1)                             |
| Women who changed address during pregnancy                   | 2 336 (13.3)                                                  | 1 782 (12.4)                         | 1 471 (12.0)                          |
| Parity                                                       |                                                               |                                      |                                       |
| 0                                                            | 8 310 (47.4)                                                  | 6 973 (48.5)                         | 6 003 (49.1)                          |
| 1                                                            | 6 328 (36.1)                                                  | 5 138 (35.7)                         | 4 310 (35.2)                          |
| ≥2                                                           | 2 895 (16.5)                                                  | 2 275 (15.8)                         | 1 918 (15.7)                          |
| Sex of child                                                 |                                                               |                                      |                                       |
| Boy                                                          | 8 925 (50.9)                                                  | 7 285 (50.6)                         | 6 177 (50.5)                          |
| Girl                                                         | 8 608 (49.1)                                                  | 7 101 (49.4)                         | 6 054 (49.5)                          |
| Maternal age at delivery, years                              | 31.0 ± 4.5                                                    | 31.1 ± 4.4                           | 31.2 ± 4.3                            |
| Marital status                                               |                                                               |                                      |                                       |
| Married/cohabiting                                           | 16 780 (95.7)                                                 | 13 839 (96.2)                        | 11 797 (96.5)                         |
| Other                                                        | 753 (4.3)                                                     | 547 (3.8)                            | 434 (3.6)                             |
| Maternal education                                           |                                                               |                                      |                                       |
| Less than high school                                        | 986 (5.6)                                                     | 713 (5.0)                            | 547 (4.5)                             |
| High school                                                  | 4 175 (23.8)                                                  | 3 465 (24.1)                         | 2 845 (23.3)                          |
| Up to 4 years of college                                     | 6 480 (37.0)                                                  | 5 677 (39.5)                         | 4 919 (40.2)                          |
| More than 4 years of college (master or professional degree) | 4 867 (27.8)                                                  | 4 254 (29.6)                         | 3 731 (30.5)                          |
| Missing                                                      | 1 025 (5.9)                                                   | 277 (1.9)                            | 189 (1.6)                             |
| Maternal smoking during pregnancy                            | 1 085 (6.2)                                                   | 843 (5.9)                            | 675 (5.5)                             |
| Missing                                                      | 1 000 (5.7)                                                   | 263 (1.8)                            | 185 (1.5)                             |
| Maternal pre-pregnancy body mass index <sup>a</sup>          | 23.5 ± 3.8                                                    | 23.5 ± 3.7                           | 23.5 ± 3.7                            |
| Maternal atopy                                               | 5 802 (33.1)                                                  | 4 947 (34.4)                         | 4 276 (35.0)                          |
| Season of birth                                              |                                                               |                                      |                                       |
| Winter                                                       | 4 099 (23.4)                                                  | 3 352 (23.3)                         | 2 858 (23.4)                          |
| Spring                                                       | 4 686 (26.7)                                                  | 3 851 (26.8)                         | 3 191 (26.1)                          |
| Summer                                                       | 4 630 (26.4)                                                  | 3 827 (26.6)                         | 3 312 (27.1)                          |
| Autumn                                                       | 4 118 (23.5)                                                  | 3 356 (23.3)                         | 2 870 (23.5)                          |

Numbers are n (%) or mean ± standard deviation.

LRTI – lower respiratory tract infections.

<sup>a</sup>Missing data for maternal pre-pregnancy body mass index (BMI): baseline cohort 1 549 (8.8%), at 6 months 693 (4.8%), at 18 months 522 (4.3%).

**Table 2.** LUR modelled air pollution exposure using residential address at time of birth. Exposure during the whole pregnancy and by trimester.

|                                                                 | <b>Oslo</b>   | <b>Akershus</b> | <b>Bergen</b> | <b>Hordaland</b> | <b>Total</b>   |
|-----------------------------------------------------------------|---------------|-----------------|---------------|------------------|----------------|
|                                                                 | <b>N=4669</b> | <b>N=7554</b>   | <b>N=3869</b> | <b>N=1441</b>    | <b>N=17533</b> |
| Mean LUR modelled NO <sub>2</sub> exposure (µg/m <sup>3</sup> ) |               |                 |               |                  |                |
| Whole pregnancy                                                 | 21.6 ± 4.4    | 10.3 ± 3.8      | 13.2 ± 6.2    | 6.3 ± 4.3        | 13.6 ± 6.9     |
| Trimester 1                                                     | 21.7 ± 6.1    | 10.2 ± 4.2      | 13.4 ± 6.4    | 6.5 ± 4.4        | 13.7 ± 7.4     |
| Trimester 2                                                     | 22.0 ± 6.1    | 10.4 ± 4.3      | 13.3 ± 6.5    | 6.3 ± 4.3        | 13.8 ± 7.5     |
| Trimester 3                                                     | 21.5 ± 6.1    | 10.3 ± 4.2      | 13.1 ± 6.3    | 6.3 ± 4.3        | 13.6 ± 7.3     |

Numbers are mean ± standard deviation

LUR – land use regression

European Union air quality standard for NO<sub>2</sub>: 1-year average 40 µg/m<sup>3</sup>

**Table 3.** Associations between pregnancy exposure to NO<sub>2</sub> and respiratory health of children by age 6 and 18 months.

|                                        | Crude   |         |                     | Adjusted |         |                     |
|----------------------------------------|---------|---------|---------------------|----------|---------|---------------------|
|                                        | N total | N cases | RR (95% CI)         | N total  | N cases | RR (95% CI)         |
| <b>Main analysis<sup>a</sup></b>       |         |         |                     |          |         |                     |
| LRTI 0-6 months                        | 13 886  | 653     | 0.84 (0.76 to 0.95) | 13 116   | 616     | 0.99 (0.84 to 1.17) |
| LRTI 6-18 months                       | 12 001  | 1 469   | 0.94 (0.94 to 1.01) | 11 412   | 1 388   | 1.05 (0.94 to 1.16) |
| Wheeze 6-18 months                     | 11 976  | 4 961   | 1.00 (0.97 to 1.03) | 11 387   | 4 712   | 1.02 (0.97 to 1.07) |
| <b>Stratified analysis<sup>b</sup></b> |         |         |                     |          |         |                     |
| <b>Oslo</b>                            |         |         |                     |          |         |                     |
| LRTI 0-6 months                        | 3 695   | 136     | 0.72 (0.51 to 1.02) | 3 530    | 128     | 0.76 (0.54 to 1.06) |
| LRTI 6-18 months                       | 3 246   | 351     | 0.85 (0.69 to 1.06) | 3 111    | 331     | 0.89 (0.71 to 1.12) |
| Wheeze 6-18 months                     | 3 248   | 1 315   | 1.05 (0.96 to 1.16) | 3 111    | 1 253   | 1.04 (0.95 to 1.15) |
| <b>Akershus</b>                        |         |         |                     |          |         |                     |
| LRTI 0-6 months                        | 6 014   | 281     | 1.22 (0.90 to 1.65) | 5 619    | 263     | 1.32 (0.97 to 1.80) |
| LRTI 6-18 months                       | 5 237   | 689     | 1.15 (0.96 to 1.38) | 4 939    | 649     | 1.15 (0.95 to 1.39) |
| Wheeze 6-18 months                     | 5 228   | 2 192   | 1.01 (0.93 to 1.10) | 4 930    | 2 066   | 1.12 (0.94 to 1.34) |
| <b>Bergen</b>                          |         |         |                     |          |         |                     |
| LRTI 0-6 months                        | 3 045   | 169     | 0.90 (0.71 to 1.16) | 2 899    | 161     | 0.96 (0.74 to 1.25) |
| LRTI 6-18 months                       | 2 560   | 318     | 1.00 (0.85 to 1.18) | 2 449    | 301     | 1.04 (0.86 to 1.22) |
| Wheeze 6-18 months                     | 2 548   | 1 073   | 1.00 (0.93 to 1.07) | 2 438    | 1 030   | 1.00 (0.89 to 1.07) |
| <b>Hordaland</b>                       |         |         |                     |          |         |                     |
| LRTI 0-6 months                        | 1 132   | 67      | 0.84 (0.49 to 1.46) | 1 068    | 64      | 0.93 (0.50 to 1.63) |
| LRTI 6-18 months                       | 958     | 111     | 1.31 (0.89 to 1.93) | 913      | 107     | 1.36 (0.88 to 2.03) |
| Wheeze 6-18 months                     | 952     | 381     | 1.19 (1.00 to 1.42) | 908      | 363     | 1.12 (0.94 to 1.34) |

Effect estimates per 10µg/m<sup>3</sup> NO<sub>2</sub>

LRTI – lower respiratory tract infections

<sup>a</sup>Adjusted for maternal age at delivery, years of birth, maternal marital status, maternal education, sex of child, maternal prepregnancy BMI, smoking during pregnancy, parity, maternal atopy and study area.

<sup>b</sup>Adjusted for maternal age at delivery, year of birth, maternal marital status, maternal education, sex of child, maternal prepregnancy BMI, smoking during pregnancy, parity, maternal atopy.

STROBE Statement—Checklist of items that should be included in reports of *cohort studies*

|                              | Item No | Recommendation                                                                                                                                                                                                                                                                                                                                                                                                                                            |
|------------------------------|---------|-----------------------------------------------------------------------------------------------------------------------------------------------------------------------------------------------------------------------------------------------------------------------------------------------------------------------------------------------------------------------------------------------------------------------------------------------------------|
| <b>Title and abstract</b>    | 1       | (a) Indicate the study's design with a commonly used term in the title or the abstract – <a href="#">page 1</a> .<br>(b) Provide in the abstract an informative and balanced summary of what was done and what was found – <a href="#">page 2</a> .                                                                                                                                                                                                       |
| <b>Introduction</b>          |         |                                                                                                                                                                                                                                                                                                                                                                                                                                                           |
| Background/rationale         | 2       | Explain the scientific background and rationale for the investigation being reported – <a href="#">page 4</a> .                                                                                                                                                                                                                                                                                                                                           |
| Objectives                   | 3       | State specific objectives, including any prespecified hypotheses – <a href="#">page 5</a> .                                                                                                                                                                                                                                                                                                                                                               |
| <b>Methods</b>               |         |                                                                                                                                                                                                                                                                                                                                                                                                                                                           |
| Study design                 | 4       | Present key elements of study design early in the paper – <a href="#">page 5</a> .                                                                                                                                                                                                                                                                                                                                                                        |
| Setting                      | 5       | Describe the setting, locations, and relevant dates, including periods of recruitment, exposure, follow-up, and data collection – <a href="#">page 5</a> .                                                                                                                                                                                                                                                                                                |
| Participants                 | 6       | (a) Give the eligibility criteria, and the sources and methods of selection of participants. Describe methods of follow-up – <a href="#">page 5</a> .<br>(b) For matched studies, give matching criteria and number of exposed and unexposed – <a href="#">N.A.</a>                                                                                                                                                                                       |
| Variables                    | 7       | Clearly define all outcomes, exposures, predictors, potential confounders, and effect modifiers. Give diagnostic criteria, if applicable – <a href="#">page 6 and 7</a> .                                                                                                                                                                                                                                                                                 |
| Data sources/<br>measurement | 8*      | For each variable of interest, give sources of data and details of methods of assessment (measurement). Describe comparability of assessment methods if there is more than one group – <a href="#">page 6 and 7</a> .                                                                                                                                                                                                                                     |
| Bias                         | 9       | Describe any efforts to address potential sources of bias – <a href="#">N.A.</a>                                                                                                                                                                                                                                                                                                                                                                          |
| Study size                   | 10      | Explain how the study size was arrived at – <a href="#">page 5</a> .                                                                                                                                                                                                                                                                                                                                                                                      |
| Quantitative variables       | 11      | Explain how quantitative variables were handled in the analyses. If applicable, describe which groupings were chosen and why – <a href="#">page 6</a> .                                                                                                                                                                                                                                                                                                   |
| Statistical methods          | 12      | (a) Describe all statistical methods, including those used to control for confounding – <a href="#">page 8</a> .<br>(b) Describe any methods used to examine subgroups and interactions – <a href="#">page 8</a> .<br>(c) Explain how missing data were addressed – <a href="#">page 7</a> .<br>(d) If applicable, explain how loss to follow-up was addressed – <a href="#">N.A.</a><br>(e) Describe any sensitivity analyses – <a href="#">page 8</a> . |
| <b>Results</b>               |         |                                                                                                                                                                                                                                                                                                                                                                                                                                                           |
| Participants                 | 13*     | (a) Report numbers of individuals at each stage of study—eg numbers potentially eligible, examined for eligibility, confirmed eligible, included in the study, completing follow-up, and analysed – <a href="#">page 5 and Table 1</a> .<br>(b) Give reasons for non-participation at each stage – <a href="#">page 5</a> .<br>(c) Consider use of a flow diagram – <a href="#">N.A.</a>                                                                  |
| Descriptive data             | 14*     | (a) Give characteristics of study participants (eg demographic, clinical, social) and information on exposures and potential confounders – <a href="#">page 8 and 9</a> .<br>(b) Indicate number of participants with missing data for each variable of interest – <a href="#">page 5</a> .<br>(c) Summarise follow-up time (eg, average and total amount) – <a href="#">page 5</a> .                                                                     |
| Outcome data                 | 15*     | Report numbers of outcome events or summary measures over time – <a href="#">page 8 and Table 1</a> .                                                                                                                                                                                                                                                                                                                                                     |
| Main results                 | 16      | (a) Give unadjusted estimates and, if applicable, confounder-adjusted estimates and                                                                                                                                                                                                                                                                                                                                                                       |

|                          |    |                                                                                                                                                                                                       |
|--------------------------|----|-------------------------------------------------------------------------------------------------------------------------------------------------------------------------------------------------------|
|                          |    | their precision (eg, 95% confidence interval). Make clear which confounders were adjusted for and why they were included – <a href="#">pages 8-9, Figure 1 and Tables 2-3.</a>                        |
|                          |    | (b) Report category boundaries when continuous variables were categorized – <a href="#">page 8 and 9.</a>                                                                                             |
|                          |    | (c) If relevant, consider translating estimates of relative risk into absolute risk for a meaningful time period – <a href="#">N.A.</a>                                                               |
| Other analyses           | 17 | Report other analyses done—eg analyses of subgroups and interactions, and sensitivity analyses – <a href="#">page 9.</a>                                                                              |
| <b>Discussion</b>        |    |                                                                                                                                                                                                       |
| Key results              | 18 | Summarise key results with reference to study objectives – <a href="#">page 9.</a>                                                                                                                    |
| Limitations              | 19 | Discuss limitations of the study, taking into account sources of potential bias or imprecision. Discuss both direction and magnitude of any potential bias – <a href="#">page 11.</a>                 |
| Interpretation           | 20 | Give a cautious overall interpretation of results considering objectives, limitations, multiplicity of analyses, results from similar studies, and other relevant evidence – <a href="#">page 11.</a> |
| Generalisability         | 21 | Discuss the generalisability (external validity) of the study results – <a href="#">page 10-11.</a>                                                                                                   |
| <b>Other information</b> |    |                                                                                                                                                                                                       |
| Funding                  | 22 | Give the source of funding and the role of the funders for the present study and, if applicable, for the original study on which the present article is based – <a href="#">page 12.</a>              |

\*Give information separately for exposed and unexposed groups.

**Note:** An Explanation and Elaboration article discusses each checklist item and gives methodological background and published examples of transparent reporting. The STROBE checklist is best used in conjunction with this article (freely available on the Web sites of PLoS Medicine at <http://www.plosmedicine.org/>, Annals of Internal Medicine at <http://www.annals.org/>, and Epidemiology at <http://www.epidem.com/>). Information on the STROBE Initiative is available at <http://www.strobe-statement.org>.

# BMJ Open

## Pregnancy exposure to air pollution and early childhood respiratory health in the Norwegian Mother and Child Cohort Study (MoBa)

|                                 |                                                                                                                                                                                                                                                                                                                                                                                                                                                                                                                                                                                                                                                                                                                                                                                                                                                                                |
|---------------------------------|--------------------------------------------------------------------------------------------------------------------------------------------------------------------------------------------------------------------------------------------------------------------------------------------------------------------------------------------------------------------------------------------------------------------------------------------------------------------------------------------------------------------------------------------------------------------------------------------------------------------------------------------------------------------------------------------------------------------------------------------------------------------------------------------------------------------------------------------------------------------------------|
| Journal:                        | <i>BMJ Open</i>                                                                                                                                                                                                                                                                                                                                                                                                                                                                                                                                                                                                                                                                                                                                                                                                                                                                |
| Manuscript ID                   | bmjopen-2016-015796.R2                                                                                                                                                                                                                                                                                                                                                                                                                                                                                                                                                                                                                                                                                                                                                                                                                                                         |
| Article Type:                   | Research                                                                                                                                                                                                                                                                                                                                                                                                                                                                                                                                                                                                                                                                                                                                                                                                                                                                       |
| Date Submitted by the Author:   | 10-Jul-2017                                                                                                                                                                                                                                                                                                                                                                                                                                                                                                                                                                                                                                                                                                                                                                                                                                                                    |
| Complete List of Authors:       | Madsen, Christian; Nasjonalt folkehelseinstitutt, Department of Health and Inequality<br>Håberg, Siri; Nasjonalt folkehelseinstitutt, Domain for Mental and Physical Health<br>Magnus, Maria; Nasjonalt folkehelseinstitutt, Department of Chronic Diseases<br>Aamodt, Geir; Norwegian University of Life Sciences, Department of Landscape Architecture and Spatial Planning<br>Stigum, Hein; Norwegian Institute of Public Health, Department of Chronic Diseases; University of Oslo, Department of Community Medicine and Global Health<br>London, Stephanie J.; National Institute of Environmental Health Sciences, Epidemiology<br>Nystad, Wenche; Nasjonalt folkehelseinstitutt, Department of Chronic Diseases<br>Nafstad, Per; Nasjonalt folkehelseinstitutt, Department of Chronic Diseases; University of Oslo, Department of Community Medicine and Global Health |
| <b>Primary Subject Heading</b>: | Epidemiology                                                                                                                                                                                                                                                                                                                                                                                                                                                                                                                                                                                                                                                                                                                                                                                                                                                                   |
| Secondary Subject Heading:      | Reproductive medicine                                                                                                                                                                                                                                                                                                                                                                                                                                                                                                                                                                                                                                                                                                                                                                                                                                                          |
| Keywords:                       | air pollution, NO2, pregnancy, lower respiratory tract infections, wheezing, The Norwegian Mother and Child Cohort Study                                                                                                                                                                                                                                                                                                                                                                                                                                                                                                                                                                                                                                                                                                                                                       |
|                                 |                                                                                                                                                                                                                                                                                                                                                                                                                                                                                                                                                                                                                                                                                                                                                                                                                                                                                |

SCHOLARONE™  
Manuscripts



1  
2  
3 **Pregnancy exposure to air pollution and early childhood respiratory health**  
4  
5 **in the Norwegian Mother and Child Cohort Study (MoBa)**  
6  
7  
8  
9

10 Christian Madsen<sup>a</sup>, Siri Eldevik Håberg<sup>a</sup>, Maria C. Magnus<sup>a</sup>, Geir Aamodt<sup>b</sup>, Hein Stigum<sup>a,c</sup>, Stephanie  
11 J. London<sup>d</sup>, Wenche Nystad<sup>a</sup>, Per Nafstad<sup>a,c</sup>  
12  
13

14  
15  
16 <sup>a</sup> Domain for Mental and Physical Health, Norwegian Institute of Public Health, Oslo, Norway  
17

18 <sup>b</sup> Department of Landscape Architecture and Spatial Planning, Norwegian University of Life Sciences,  
19 Ås, Norway  
20

21  
22 <sup>c</sup> Department of Community Medicine and Global Health, Medical Faculty, University of Oslo, Oslo,  
23 Norway  
24

25  
26 <sup>d</sup> National Institute of Environmental Health Sciences, National Institutes of Health, Department of  
27 Health and Human Services, Research Triangle Park, North Carolina, USA  
28  
29  
30  
31  
32  
33  
34  
35  
36  
37  
38  
39  
40  
41

42 Correspondence to:

43 Christian Madsen

44  
45  
46 Tel. +4721078060

47  
48 E-mail: [christian.madsen@fhi.no](mailto:christian.madsen@fhi.no)  
49

50 Department of Health and Inequality,  
51

52 Domain for Mental and Physical Health,  
53

54 Norwegian Institute of Public Health,  
55

56 P.O. Box 4404 Nydalen, N-0403 Oslo, Norway.  
57  
58  
59  
60

**Abstract**

**Objectives** It is unclear whether maternal air pollution exposure during pregnancy induces changes in the developing respiratory system of a child and whether it has consequences for respiratory health in early childhood. We investigated associations between exposure to moderate levels of air pollution during pregnancy and early childhood lower respiratory tract infections (LRTI) and wheezing.

**Methods** This study used a sub-group of 17 533 participants in the Norwegian Mother and Child Cohort Study (MoBa). Air pollution levels at residential addresses were estimated using land use regression (LUR) models, and back-extrapolated to the period of each pregnancy. Information on LRTI and wheezing, and lifestyle factors was collected from questionnaires completed by mothers during pregnancy and when the child was 6 and 18 months of age.

**Results** Moderate mean levels of NO<sub>2</sub> (13.6 µg/m<sup>3</sup>, range 0.01 to 60.4) exposure at residential address during pregnancy were not statistically associated with LRTI and wheezing. No association was found per 10 µg/m<sup>3</sup> change in NO<sub>2</sub> exposure and LRTI before age 6 months (adjusted RR 0.99; 95% CI 0.84 to 1.17), or between 6-18 months of age (adjusted RR 1.05; 95% CI 0.94 to 1.16). Similar, we found no association per 10 µg/m<sup>3</sup> change in NO<sub>2</sub> exposure and wheezing between 6-18 months of age (adjusted RR 1.02; 95% CI 0.97 to 1.07). An exploratory post hoc analysis indicated an increased risk for LRTIs 6 to 18 months in girls only (adjusted RR 1.20; 95% CI 1.02 to 1.46).

**Conclusions** There were no statistically significant associations for moderate levels of pregnancy NO<sub>2</sub> exposure and respiratory health outcomes during early childhood in overall analyses. However, a post hoc analysis gave some support to the idea that girls may have higher risk for developing LRTI given prenatal air pollution exposure.

**Strengths and limitations of this study**

- Large prospective cohort with data on lower respiratory tract infections, with additional linked data from medical birth registry.
- Land use regression modelled traffic exposure assessment at residential address using both spatial and temporal adjustment.
- The mean air pollution exposures explored in this study are relatively low.
- Not possible to identify pregnancies where the mothers continued to live at the same address during the whole study period.

## Introduction

There is increasing evidence from both experimental and epidemiologic studies that the prenatal period is a critical window for harmful effects from different types of exposures on respiratory health.<sup>1</sup> Lower respiratory tract infections (LRTI) are common in infants and young children.<sup>2</sup> They are caused primarily by viral pathogens and are clinically expressed as bronchiolitis, or pneumonia.<sup>2</sup> Childhood wheeze is a symptom of several heterogeneous conditions, and may occur during viral respiratory infections or be associated with atopy.<sup>3</sup> Infections and wheeze are also closely related in young children. Respiratory diseases in early childhood may have long term consequences, accounting for a significant proportion of adult lung disease.<sup>2,4</sup> Special attention should be given to modifiable factors that may influence lung development at crucial stages (prenatally and postnatally). Numerous epidemiologic studies have shown that children exposed to tobacco smoke or higher levels of ambient air pollution above recommended levels (e.g. standards from the EU or the WHO) are more prone to develop respiratory disorders.<sup>5-7</sup> Air pollution may affect the lungs by inducing low-grade systemic inflammation and oxidative stress,<sup>8</sup> leading to pathological changes in the respiratory system. Children are particularly susceptible due to the continuous development of lungs that takes place from embryogenesis to early adolescence,<sup>4,9</sup> and continuous immune system development.<sup>10</sup> Of particular interest is intrauterine exposure, where air pollution may indirectly affect the developing lung tissue of the foetus.<sup>11,12</sup>

A number of studies have reported association of maternal smoking during pregnancy with frequent respiratory tract infections, chronic bronchitis, wheezing, and asthma in children.<sup>13-15</sup> Maternal smoking is well-accepted as a risk factor for adverse birth outcomes and lends support for a role of outdoor air pollution on pregnancy outcomes.<sup>16</sup> Furthermore, maternal smoking during pregnancy has been identified as an independent risk factor for wheeze and LRTI in the children's first 18 months of life.<sup>17</sup> There is an ongoing interest in whether exposure to ambient air pollution during pregnancy might influence respiratory health in early childhood.<sup>18</sup> The effect of air pollution exposure during pregnancy on respiratory health and allergic responses early in life has been examined by several studies with large heterogeneity.<sup>19-24</sup> Some studies report associations of prenatal air pollution exposure with LRTI in early childhood.<sup>19-22</sup> Other studies have found no support for an association

1  
2  
3 between air pollution exposure and LRTI in early childhood.<sup>23 24</sup> In addition, there are animal exposure  
4 studies that have identified both anatomic/mechanical and immunological mechanisms by which air  
5 pollution exposure may increase susceptibility of the respiratory system to infections.<sup>25 26</sup>  
6  
7

8  
9 In this study, we investigated the associations between estimated exposure to traffic-related air  
10 pollution during pregnancy and early childhood respiratory health (LRTI and wheeze) in selected  
11 urban and county areas of Norway. Norway is characterized by relatively low levels of air pollution,<sup>27</sup>  
12 and it is of interest whether low levels might interfere with intrauterine respiratory system  
13 development and affect respiratory health later in life.  
14  
15  
16  
17  
18  
19

## 20 21 **Methods**

### 22 *Study population*

23  
24 The Norwegian Mother and Child Cohort Study (MoBa) is a prospective population-based pregnancy  
25 cohort study conducted by the Norwegian Institute of Public Health.<sup>27</sup> Pregnant women were recruited  
26 from all over Norway from 1999 to 2008. Among invited women, 41% consented to participate.  
27 Mothers could participate with more than one child, resulting in 114 500 children and 95 200 mothers  
28 included in the cohort.  
29  
30  
31  
32  
33  
34

35 All participants living in our study areas (Oslo, Bergen, Akershus, and Hordaland) were  
36 eligible for our study (N=22 149, 23.3%). We excluded participants with missing NO<sub>2</sub> exposure  
37 information (N=3 876), multiple births (N=664) and non-live births (N=76). Only data on singleton  
38 live births were used in the analyses. Total number of participants from the four study areas was  
39 17 533 (79%). Pregnancy-related information was obtained from the Medical Birth Registry of  
40 Norway (MBRN).  
41  
42  
43  
44  
45  
46  
47

48 Mothers participating in the MoBa study completed a number of questionnaires during follow-  
49 up. We used data on lifestyle characteristics from the first questionnaire completed at recruitment  
50 (approximately at week 17-18 of pregnancy) and another questionnaire completed at week 30 of  
51 pregnancy. Information on the respiratory outcomes was collected from maternal questionnaires  
52 completed when the child was 6 and 18 months of age. The children were born from 2001 to 2009, 14  
53 386 mothers had returned the questionnaire at 6 months, and 12 231 had returned the questionnaire at  
54  
55  
56  
57  
58  
59  
60

1  
2  
3 18 months (Table 1).  
4

5 The study was approved by the regional Ethics committee and the Norwegian Data  
6 Inspectorate. The current study is based on versions VI (pregnancy data) and VIII (respiratory  
7 outcomes) of the quality-assured data files released for research on the 15<sup>th</sup> April 2011 and on the 14<sup>th</sup>  
8 February 2014, respectively.  
9  
10  
11  
12

## 13 **2.2 Outcomes and covariates**

14  
15  
16 The outcomes, LRTI and wheeze, were based on the maternal report from questionnaires filled when  
17 children were 6 and 18 months of age. The questionnaires can be viewed at the MoBa website  
18 (<https://www.fhi.no/en/studies/moba/>). LRTIs included respiratory syncytial virus, bronchiolitis,  
19 bronchitis, and pneumonia. We classified hospitalization for any of these conditions as being  
20 hospitalized for LRTI at a) between 0-6 months of age, and b) between 6-18 months of age. Wheeze  
21 was defined as “wheezing/whistling in the chest” or “tightness in the chest” between 6 and 18 months  
22 of age. The outcomes were treated as dichotomous.  
23  
24  
25  
26  
27  
28  
29  
30

31 The following characteristics were extracted from the MBRN: parity defined as number of  
32 previous deliveries (0; 1;  $\geq 2$ ), mother’s age at birth (years), marital status (married/cohabiting; other)  
33 sex of the child (boy; girl), and year of birth. Questionnaire information was used to determine:  
34 maternal education (less than high school; high school; up to 4 years of college; more than 4 years of  
35 college (master or professional degree)), maternal smoking during pregnancy (never; any smoking  
36 during pregnancy), maternal weight at the beginning of pregnancy (kg) and maternal height (m) were  
37 used to calculate body mass index (BMI) (maternal weight divided by squared maternal height),  
38 maternal atopy (ever having hay fever, pollen allergy, atopic dermatitis, allergy to animal hair, other  
39 types of allergy, or asthma).  
40  
41  
42  
43  
44  
45  
46  
47  
48

49 Adjustment variables (Table 1) were selected based on literature analyses and included  
50 maternal age at delivery, maternal marital status, maternal education, sex of child, maternal pre-  
51 pregnancy BMI, parity, year of birth, smoking during pregnancy, maternal atopy, and area.  
52  
53  
54

## 55 ***Air pollution exposure***

1  
2  
3 In this study, we used LUR modeled exposure to traffic-related pollutant NO<sub>2</sub> at the residential address  
4 at the time of delivery for women included in MoBa. Separate models were developed for four of the  
5 recruitment areas: the two biggest cities in Norway (Oslo and Bergen) and their surrounding counties  
6 (Akershus and Hordaland).<sup>28</sup>  
7  
8  
9

10  
11 Estimates of air pollution exposure during pregnancy were based on the methodology  
12 developed for the ESCAPE project.<sup>29 30</sup> Land use regression (LUR) models for NO<sub>2</sub> levels were built  
13 for each of the studied areas in order to account for regional specifics.<sup>28</sup> Sampling of air pollution is  
14 done retrospective since it was not part of the MoBa design. We measured the spatial distribution of  
15 air pollution for Oslo and Akershus in 2010, and for Bergen and Hordaland in 2011. Measurement  
16 campaigns included three rounds of approximately two weeks duration with NO<sub>2</sub> measurements  
17 (during winter, summer and an intermediate season) within a one year period. Measurement sites (14  
18 in Oslo, 36 in Akershus and 46 in Bergen/Hordaland) were selected to represent the range of  
19 residential exposure for each study area. In the analyses, we included sites with no missing data, and  
20 no geocoding mismatches. The models provided adjusted  $R^2$  in the range of 55 – 85 %, and more  
21 details of these models is described elsewhere.<sup>28</sup>  
22  
23  
24  
25  
26  
27  
28  
29  
30  
31  
32

33 LUR models were built separately for Oslo and Akershus. Only one model was built for the  
34 whole Hordaland County (including the city Bergen) due to a low number of valid measurement sites  
35 outside Bergen. Predictors for building the LUR model were obtained from a geographical information  
36 system (GIS) analyses of the N50 and VBASE maps (received in February 2013) providing  
37 information on land use, residential density, types of landscape and road network information. We  
38 built multiple linear regression models and performed diagnostic model tests according to the method  
39 described by Beelen and colleagues.<sup>29</sup>  
40  
41  
42  
43  
44  
45  
46  
47

48 Yearly means of air pollution levels at residential address at birth were estimated using the  
49 resulting LUR models. Variables in models were truncated in accordance to the range of  
50 corresponding variables used for LUR model building. Negative modelled values were replaced with  
51 0.01 to avoid the unlikely scenario of negative modelled exposure and keep these in the analyses as  
52 low exposed addresses (N=112).<sup>28</sup> The true exposure from NO<sub>2</sub> at these addresses are most likely at  
53 the low end of the scale. In order to account for temporal variability, we used the ratio method of  
54  
55  
56  
57  
58  
59  
60

1  
2  
3 back-extrapolation to the period of each pregnancy using continuous routine monitoring station data.<sup>30</sup>  
4  
5 Daily NO<sub>2</sub> measurements were obtained from the Norwegian Institute for Air Research database  
6  
7 “Luftkvalitet.info” for the period 2000 - 2012 in Oslo (used for Oslo and Akershus), and for the period  
8  
9 2003 - 2012 in Bergen (used for Bergen and Hordaland). Daily estimates of exposure were calculated  
10  
11 using the ratio method of back-extrapolation: the LUR-modelled yearly estimate multiplied by the  
12  
13 ratio between daily NO<sub>2</sub> routine monitoring station measurement and an annual average for the year  
14  
15 when LUR measurement campaign took place. Daily NO<sub>2</sub> exposure estimates were averaged  
16  
17 separately for 1<sup>st</sup>, 2<sup>nd</sup>, and 3<sup>rd</sup> trimester, and also over the whole pregnancy.  
18  
19

### 20 21 *Statistical analysis*

22  
23 Generalized linear models was fitted to evaluate the associations between pregnancy NO<sub>2</sub> exposure  
24  
25 and respiratory outcomes. Results are presented for crude and adjusted models as risk ratios (RR) with  
26  
27 robust standard errors. Multiplicative interactions were tested in the adjusted models between the  
28  
29 continuous NO<sub>2</sub> pregnancy exposure variable and the following categorical variables: area, sex,  
30  
31 smoking during pregnancy, parity, birth season and maternal atopy.  
32

33  
34 Sensitivity analyses were performed by a) restricting the analyses to women who did not  
35  
36 change address during pregnancy, and b) restricting the analyses to pregnancies during the last period  
37  
38 (2006-2008) of the MoBa recruitment, thus closer in time to the exposure campaign and GIS-  
39  
40 variables.  
41

42  
43 Area variable was defined by the location of the address at delivery: Oslo, Akershus, Bergen  
44  
45 and Hordaland. In a previous study, the area variable was found to be an important factor in  
46  
47 attenuating the associations between exposure and birth outcome in MoBa<sup>28</sup> These differences by area  
48  
49 could be linked to more travel to and from work and to other activities, visiting central more polluted  
50  
51 parts of the city by e.g. higher educated women and for city dwellers per se. This variable is included  
52  
53 in the adjusted models since it previously has been reported to be a potential proxy for unmeasured  
54  
55 factors that could vary between each study area and thus could influence the outcome variables within  
56  
57 each separate area. Still, area may also reflect the spatial distribution of air pollution, and thus result in  
58  
59 overadjustment bias on the path between exposure and outcome.<sup>31</sup> We therefore performed a separate  
60



1  
2  
3 post hoc analysis by excluding the area variable from the adjusted model. In addition, we performed  
4 exploratory analyses post hoc by area, sex of child, parity, season of birth, and maternal atopy.

5  
6 We used ArcGIS10.1 software (Esri, CA, USA) for GIS analyses; statistical analyses were  
7 performed using STATA 13.0 (StataCorp, Texas, USA).  
8  
9

## 10 11 12 13 **Results**

14 The study population included in this study consisting of participants from the four study areas of  
15 Norway with pregnancy air pollution exposure data had similar characteristics as the whole MoBa  
16 cohort study with information from 6 months and at 18 months (Table 1). A total of 4.5% of children  
17 had LRTI between 0-6 months of age, and 12% of children had LRTI between 6-18 months of age. A  
18 total of 40.6% of the children had wheezing symptoms between 6 and 18 months of age.  
19  
20

21 The majority (86.7%) of the women did not change address during pregnancy. Maternal  
22 smoking in pregnancy was relatively uncommon (6.2%). Maternal atopy was reported in 33.1% of the  
23 women (Table 1). The distribution of the study population across birth seasons reflects the timing of  
24 recruitment into MoBa and we therefore observe slight deviation from the equal seasonal distribution.  
25  
26

27 Mean NO<sub>2</sub> exposure during whole pregnancy was  $13.6 \pm 6.9 \mu\text{g}/\text{m}^3$  NO<sub>2</sub>, which is well below  
28 the European Union air quality yearly average standard of  $40 \mu\text{g}/\text{m}^3$  NO<sub>2</sub>. The range of NO<sub>2</sub> spanned  
29 from 0.01 thru  $60.4 \mu\text{g}/\text{m}^3$ , with a total of 27 children with concentrations equal or above  $40 \mu\text{g}/\text{m}^3$  at  
30 their residential address. Exposures by trimester and the whole pregnancy exposure were highly  
31 correlated ( $r = 0.73$  to  $0.85$ ). We therefore decided to use only the average NO<sub>2</sub> exposure during the  
32 whole pregnancy as our exposure estimate in the analyses.  
33  
34

35 We found no associations of NO<sub>2</sub> exposure during pregnancy with LRTI at 0-6 months, LRTI  
36 at 6-18 months, or wheeze at 6-18 months in the overall analyses (Table 3). The main covariates  
37 affecting the change in significance of risk ratio estimate from the crude to the adjusted models were  
38 parity and area. In the stratified analyses by area we observed a consistent pattern, although not  
39 statistically significant, of positive associations for LRTI and wheeze for participants living outside  
40 big cities, in Akershus and Hordaland (Table 3). An analysis of the cumulative incidence of LRTI (0-  
41 18 months of age) was equal to an RR= 1.04 (95% CI 0.93, 1.17).  
42  
43  
44  
45  
46  
47  
48  
49  
50  
51  
52  
53  
54  
55  
56  
57  
58  
59  
60

1  
2  
3  
4  
5  
6  
7  
8  
9  
10  
11  
12  
13  
14  
15  
16  
17  
18  
19  
20  
21  
22  
23  
24  
25  
26  
27  
28  
29  
30  
31  
32  
33  
34  
35  
36  
37  
38  
39  
40  
41  
42  
43  
44  
45  
46  
47  
48  
49  
50  
51  
52  
53  
54  
55  
56  
57  
58  
59  
60

There was no evidence of effect modification by the adjustment variables. Still, there was a borderline significant interaction for child sex. A stratified analysis post hoc, showed a consistent tendency for association of pregnancy NO<sub>2</sub> exposure with LRTI and wheeze in girls, but not in boys. For instance, the risk of developing LRTI 6-18 months in girls was equal to an RR =1.20 (95% CI 1.02 to 1.42, p=0.03) per each 10µg/m<sup>3</sup> increase in NO<sub>2</sub> exposure during pregnancy. Stratified analyses post hoc by maternal atopy status and birth season did not identify any important differences between the groups. No statistically significant interactions were detected between NO<sub>2</sub> exposure and maternal atopy, sex of child, area, birth season, or parity. Sensitivity analyses resulted in no substantial changes compared to the reported results. Excluding from the adjustment set the area variable, as a factor potentially reflecting spatial distribution of air pollution, did not considerably change the results. Restricting the analyses to pregnancies during the last period of the MoBa recruitment (2006-2008) did not result in substantial changes to the reported results.

## Discussion

In this study, we found no statistically significant associations for pregnancy NO<sub>2</sub> exposure to traffic-related air pollution exposure at residential address at birth and LRTI or wheeze in early childhood.

A previously study by Esplugues and colleagues has reported similar results of no association between LUR-modelled prenatal NO<sub>2</sub> exposure (with higher than in our study whole pregnancy mean NO<sub>2</sub> values of 39.1µg/m<sup>3</sup>) with LRTI or persistent cough during the 1<sup>st</sup> year of life, but they did report an association between postnatal NO<sub>2</sub> exposure and persistent cough.<sup>23</sup> In the large international ESCAPE study, uniting cohorts from Germany, Sweden, Netherlands, and the UK, decrease in lung function parameters has been associated with exposure to LUR-modelled annual average NO<sub>2</sub>, NO<sub>x</sub>, PM<sub>2.5</sub> absorbance, and PM<sub>2.5</sub> at current address at 6 - 8 years of age, but not at birth address.<sup>32</sup>

In a post hoc analysis, we found a consistent tendency of prenatal NO<sub>2</sub> exposure association with LRTI: the association was present in girls, but not in boys. The tests of interaction was only borderline significant. Male sex is a known risk factor for both respiratory infections and wheezing in childhood.<sup>3 33 34</sup> However, the interaction between environmental exposures and prenatal lung development in boys and girls remains uncertain,<sup>35</sup> and our finding was from one of several subsample

1  
2  
3 analyses. There are differences in prenatal anatomic and physiological respiratory system development  
4  
5 in sexes, as well as different sex-hormone effects on the immune system functioning.<sup>35-37</sup> As was  
6  
7 reviewed by Casimir and colleagues, while boys outnumber girls in acute respiratory infections, girls  
8  
9 had an overall enhanced inflammatory response.<sup>38</sup> This increased inflammatory response could have  
10  
11 more adverse effects on girls than on boys.<sup>38</sup> Given the chronic low-grade systemic inflammation  
12  
13 associated with air pollution exposure,<sup>8</sup> we might expect more adverse effect in girls. However, this  
14  
15 issue is insufficiently studied, and the existing reports give contradictory results. The international  
16  
17 ESCAPE study reported stronger effects of air pollution exposure during the first year of life, which  
18  
19 was LUR-modelled at birth address, on pneumonia in girls.<sup>7</sup>

20  
21 We found some indication of different patterns for associations between prenatal air pollution  
22  
23 exposure and early respiratory health in study participants living in cities versus counties outside  
24  
25 cities. Associations between prenatal air pollution exposure and the respiratory outcomes was overall  
26  
27 greater in the non-urban areas, although the estimates were not statistically significant. This might be  
28  
29 due to a higher misclassification of exposure in cities because of higher mobility (change of residential  
30  
31 address), or due to other types of pollutants in non-urban areas.<sup>39</sup> A study by Canfield and colleagues  
32  
33 (2006) reported higher mobility for nullparous women as compared to women with several children.  
34  
35 They explained this as related to the need for larger homes due to expecting a child (first born) and a  
36  
37 need to live closer to health care facilities.<sup>40</sup> A previous study from Norway reported that half of the  
38  
39 mothers work during pregnancy and that no difference was found when comparing using only home  
40  
41 address to a weighted exposure of home and work address exposure.<sup>41</sup> On the other hand, non-city  
42  
43 population might have more homogenous exposure and spending more time close to home. Difference  
44  
45 in distribution of socioeconomic factors or parity might play a role: families with several children tend  
46  
47 to move out of large cities in Norway. Familiar predisposition to allergic disorders may be an  
48  
49 important factor in modifying the effect of tobacco smoke exposure on wheezing.<sup>36</sup> Certain months of  
50  
51 birth, due to their correlation with viral infections seasons, can be a risk factor for wheezing and  
52  
53 LRTI.<sup>3 34</sup> Our study found no differences in the effect from groups divided by maternal atopy status or  
54  
55 birth season.  
56  
57  
58  
59  
60

1  
2  
3 Our study applied standardized individual exposure assessment for the large study population,  
4 and detailed information on potential confounders was collected from prenatal questionnaires.  
5  
6 Estimates for prenatal exposure to NO<sub>2</sub> were based on LUR models and temporal back-extrapolation  
7 of exposure during entire pregnancy at the address at birth. The NO<sub>2</sub> exposure was collected during  
8 2010 and 2011, and the GIS-variables used in the modelling were collected in 2013. The modelled  
9 exposures at each address were back-extrapolated using fixed 24-hour monitoring data from each area  
10 in the period 1999-2009. Such estimates might be a subject to non-differential misclassification of  
11 exposure due to changes in GIS-variables, or differences in the participant's mobility and lifestyle  
12 factors. However, results of the sensitivity analyses only in women who did not change address during  
13 pregnancy were similar to the overall analyses. Likewise, restricting the analyses to pregnancies  
14 during the last period, closer in time to the collected exposure variables and GIS-variables, did not  
15 result in different associations than the overall analyses.  
16  
17  
18  
19  
20  
21  
22  
23  
24  
25  
26

27 In epidemiological studies investigating air pollution effects, precision of exposure estimation  
28 is an important challenge. It is usually not feasible to sample personal air pollution exposure in large  
29 birth cohorts, mainly due to the amount of participants needed and due to the fact of not having  
30 information about the pregnancy before week 17. It has therefore become increasingly common to  
31 apply modelling of air pollution exposure at individual residential addresses, such as dispersion  
32 models and LUR models. High correlations have previously been reported between indoor and  
33 outdoor concentrations of NO<sub>2</sub>,<sup>42</sup> and NO<sub>2</sub> is also reported to display higher spatial variation as  
34 compared to other pollutants,<sup>43</sup> thus making it a better proxy for individual air pollution exposure.  
35  
36  
37  
38  
39  
40  
41  
42

43 The mean air pollution exposure levels explored in this study may be relatively low for  
44 detecting the association between prenatal exposure and postnatal respiratory health, and the reported  
45 effect estimates might be biased towards null due to non-differential misclassification of exposure. It  
46 could also be difficult to disentangle prenatal and early postnatal exposure to air pollution if family  
47 continues to live at the same address at these two periods. Prenatal exposures need to be carefully  
48 studied for identifying potential critical windows of exposure. In our data, exposures by trimester were  
49 highly correlated with whole pregnancy exposure, and therefore we only assessed the exposure during  
50 entire pregnancy. More studies are needed for exploring the causative association between prenatal air  
51  
52  
53  
54  
55  
56  
57  
58  
59  
60

1  
2  
3 pollution exposure and respiratory health early in childhood, for characterizing critical time windows  
4 and main pollutants that are involved in pathological changes. Of interest for future research is the sex  
5 difference in prenatal exposure effect identified in our study.  
6  
7

8  
9 In this large Norwegian pregnancy cohort we found no statistically significant associations for  
10 moderate levels of exposure to NO<sub>2</sub> during pregnancy and childhood respiratory health measured by  
11 LRTI and wheeze.  
12

13  
14  
15 **Acknowledgements:** The co-authors would like to express gratitude to all MoBa cohort participants  
16 and research team, to Sviatlana Panasevich and Jon Wickmann at NIPH for their help with the  
17 database management, and to the Norwegian Institute for Air Research team for providing valuable  
18 research data thru their national air quality database. The authors also wants to thank the reviewers for  
19 their valuable comments.  
20  
21  
22  
23  
24  
25  
26  
27  
28

29  
30 **Contribution to authorship:** PN, SJL, WN, PM were involved in conception, hypothesis delineation  
31 and study design. SJL, GA, SEH, CM contributed to the exposure assessment. CM and PN drafted the  
32 manuscript. All authors were involved in data interpretation and approved the final submitted version  
33 of the manuscript.  
34  
35  
36  
37  
38

39  
40 **Funding:** The Norwegian Mother and Child Cohort Study is supported by the Norwegian Ministry of  
41 Health and the Ministry of Education and Research, NIH/NIEHS (contract no N01-ES-75558),  
42 NIH/NIDS (grant no.1 UO1NS 047537-01 and grant no.2 UO1 NS 047537-06A1). This study was  
43 also supported by the Research Council of Norway (grant no.196102) and the Intramural Research  
44 Program of the NIH, National Institute of Environmental Health Sciences (project number Z01  
45 ES49019).  
46  
47  
48  
49  
50  
51  
52

53  
54 **Details of ethics approval:** The Norwegian Mother and Child Cohort Study has approvals from the  
55 Regional Ethics Committee and the Norwegian Data Inspectorate. The current study is based on  
56 version VI of the quality-assured data files released for research on the 15<sup>th</sup> April 2011.  
57  
58  
59  
60

1  
2  
3  
4  
5 **Data sharing statement:** Technical description of the MoBa data can be found at the study website  
6  
7 (<https://www.fhi.no/en/studies/moba/>). Researchers can apply for access to the dataset  
8  
9 (<https://www.fhi.no/en/more/research--access-to-data/>). Statistical code is available upon request from  
10  
11 the corresponding author.  
12

13  
14  
15 **Competing interests:** none declared.  
16

## 17 18 19 **References**

- 20  
21 1. Pinkerton KE, Joad JP. Influence of air pollution on respiratory health during perinatal  
22 development. *Clin Exp Pharmacol Physiol* 2006;33:269–272.  
23
- 24 2. Graham NM. The epidemiology of acute respiratory infections in children and adults: a global  
25 perspective. *Epidemiol Rev* 1990;12:149-178.  
26
- 27 3. Sherriff A, Peters TJ, Henderson J, *et al*. Risk factor associations with wheezing patterns in  
28 children followed longitudinally from birth to 3(1/2) years. *Int J Epidemiol* 2001;30:1473-  
29 1484.  
30
- 31 4. Merkus PJ. Effects of childhood respiratory diseases on the anatomical and functional  
32 development of the respiratory system. *Paediatr Respir Rev*, 2003;4:28-39.  
33
- 34 5. Carlsen KH, Carlsen KC. Respiratory effects of tobacco smoking on infants and young  
35 children. *Paediatr Respir Rev*, 2008;9:11-20.  
36
- 37 6. Goldizen FC, Knibbs LD, Sly PD. Respiratory effects of air pollution on children. *Pediatr*  
38 *Pulmonol* 2016;51:94-108.  
39
- 40 7. MacIntyre EA, Gehring U, Molter A, *et al*. Air pollution and respiratory infections during  
41 early childhood: an analysis of 10 European birth cohorts within the ESCAPE Project.  
42 *Environ Health Perspect* 2014;122:107-113.  
43
- 44 8. Brook RD, Rajagopalan S, Pope CA, *et al*. Particulate matter air pollution and cardiovascular  
45 disease: An update to the scientific statement from the American Heart Association.  
46 *Circulation* 2010;121:2331-2378.  
47  
48  
49  
50  
51  
52  
53  
54  
55  
56  
57  
58  
59  
60

- 1  
2  
3 9. Pinkerton KE, Joad JP. Influence of air pollution on respiratory health during perinatal  
4 development. *Clin Exp Pharmacol Physiol* 2006;33:269-272.
- 5  
6  
7 10. Goenka A, Kollmann TR. Development of immunity in early life. *J Infect* 2015;71:S112-120.
- 8  
9  
10 11. Nelly D, Plusquin M, xx, *et al.* In Utero Fine Particle Air Pollution and Placental Expression  
11 of Genes in the Brain-Derived Neurotrophic Factor Signaling Pathway: An ENVIRONAGE  
12 Birth Cohort Study. *Environ Health Perspect* 2015;123:834-840.
- 13  
14  
15 12. Veras MM, Damaceno-Rodrigues NR, Caldini EG, *et al.* Particulate Urban Air Pollution  
16 Affects the Functional Morphology of Mouse Placenta. *BIOLOGY OF REPRODUCTION*  
17 2008;79:578-584.
- 18  
19  
20 13. Burke H, Leonardi-Bee J, Hashim A, *et al.* Prenatal and passive smoke exposure and  
21 incidence of asthma and wheeze: systematic review and meta-analysis. *Pediatrics*  
22 2012;129:735-744.
- 23  
24  
25 14. Jaakkola JJ, Kosheleva AA, Katsnelson BA, *et al.* Prenatal and postnatal tobacco smoke  
26 exposure and respiratory health in Russian children. *Respir Res* 2006;7:48.
- 27  
28  
29 15. Ruskamp J, Smit H, Rovers M, *et al.* Neonatal total IgE and respiratory tract infections in  
30 children with intrauterine smoke exposure. *Arch Dis Child* 2010;95:427-431.
- 31  
32  
33 16. Cheraghi M, Salvi S. Environmental tobacco smoke (ETS) and respiratory health in children.  
34 *European Journal of Pediatrics*, 2009;168(8):897-905.
- 35  
36  
37 17. Haberg SE, Stigum H, Nystad W, *et al.* Effects of pre- and postnatal exposure to parental  
38 smoking on early childhood respiratory health. *Am J Epidemiol* 2007;166:679-686.
- 39  
40  
41 18. Proietti E, Roosli M, Frey U, *et al.* Air Pollution During Pregnancy and Neonatal Outcome: A  
42 Review. *Journal of Aerosol Medicine and Pulmonary Drug Delivery* 2013;26:9-23.
- 43  
44  
45 19. Nordling E, Berglind N, Melen E, *et al.* Traffic-related air pollution and childhood respiratory  
46 symptoms, function and allergies. *Epidemiology* 2008;19:401-408.
- 47  
48  
49 20. Jedrychowski W, Perera F, Maugeri U, *et al.* Effects of prenatal and perinatal exposure to fine  
50 air pollutants and maternal fish consumption on the occurrence of infantile eczema. *Int Arch*  
51 *Allergy Immunol* 2011;155:275-281.
- 52  
53  
54  
55  
56  
57  
58  
59  
60

- 1  
2  
3 21. Aguilera I, Pedersen M, Garcia-Esteban R, *et al.* Early-Life Exposure to Outdoor Air  
4 Pollution and Respiratory Health, Ear Infections, and Eczema in Infants from the INMA  
5 Study. *Environ Health Perspect* 2013;121:387–392.  
6  
7
- 8  
9 22. Rice MB, Rifas-Shiman SL, Oken E, *et al.* Exposure to traffic and early life respiratory  
10 infection: A cohort study. *Pediatr Pulmonol* 2014;50:252-259.  
11  
12
- 13 23. Esplugues A, Ballester F, Estarlich M, *et al.* Outdoor, but not indoor, nitrogen dioxide  
14 exposure is associated with persistent cough during the first year of life. *Sci Total Environ*,  
15 2011;409:4667-4673.  
16  
17
- 18 24. Miyake Y, Tanaka K, Fujiwara H, *et al.* Residential proximity to main roads during pregnancy  
19 and the risk of allergic disorders in Japanese infants: the Osaka Maternal and Child Health  
20 Study. *Pediatr Allergy Immunol* 2010;21:22–28.  
21  
22
- 23 25. Harrod KS, Jaramillo RJ, Rosenberger CL, *et al.* Increased susceptibility to RSV infection by  
24 exposure to inhaled diesel engine emissions. *Am J Respir Cell Mol Biol* 2003;28:451–463.  
25  
26
- 27 26. Castranova V, Ma JY, Yang HM, *et al.* Effect of exposure to diesel exhaust particles on the  
28 susceptibility of the lung to infection. *Environ Health Perspect* 2001;109:609–612.  
29  
30
- 31 27. Magnus P, Birke C, Vejrup K, *et al.* Cohort Profile Update: The Norwegian Mother and Child  
32 Cohort Study (MoBa). *Int J Epidemiol* 2016;45:382-388.  
33  
34
- 35 28. Panasevich S, Håberg SE, Aamodt G, *et al.* Association between pregnancy exposure to air  
36 pollution and birth weight in selected areas of Norway. *Archives of Public Health* 2016;74:26.  
37  
38
- 39 29. Beelen R, Hoek G, Vienneau D, *et al.* Development of NO<sub>2</sub> and NO<sub>x</sub> land use regression  
40 models for estimating air pollution exposure in 36 study areas in Europe - The ESCAPE  
41 project. *Atmospheric Environment* 2013;72:10-23.  
42  
43
- 44 30. Pedersen M, Giorgis-Allemand L, Bernard C, *et al.* Ambient air pollution and low  
45 birthweight: a European cohort study (ESCAPE). *Lancet Respir Med* 2013;1:695-704.  
46  
47
- 48 31. Schisterman EF, Cole SR, Platt RW. Overadjustment Bias and Unnecessary Adjustment in  
49 Epidemiologic Studies. *Epidemiology*, 2009;20(4):488-495.  
50  
51
- 52 32. Gehring U, Gruzieva O, Agius RM, *et al.* Air pollution exposure and lung function in  
53 children: the ESCAPE project. *Environ Health Perspect* 2013;121:1357-1364.  
54  
55  
56  
57  
58  
59  
60



- 1  
2  
3 33. Herr M, Just J, Nikasinovic L, *et al.* Influence of host and environmental factors on wheezing  
4 severity in infants: findings from the PARIS birth cohort. *Clin Exp Allergy* 2012;42:275-283.  
5  
6  
7 34. Simoes EA. Environmental and demographic risk factors for respiratory syncytial virus lower  
8 respiratory tract disease. *J Pediatr* 2003;143:S118-126.  
9  
10  
11 35. Postma DS. Gender differences in asthma development and progression. *Gen Med*  
12 2007;4:S133-146.  
13  
14 36. Muenchhoff M, Goulder PJ. Sex differences in pediatric infectious diseases. *J Infect Dis*  
15 2014;209:S120-126.  
16  
17 37. Uekert SJ, Akan G, Evans MD, *et al.* Sex-related differences in immune development and the  
18 expression of atopy in early childhood. *J Allergy Clin Immunol* 2006;118:1375-1381.  
19  
20  
21 38. Casimir GJ, Lefevre N, Corazza F, *et al.* Sex and inflammation in respiratory diseases: a  
22 clinical viewpoint. *Biol Sex Differ* 2013;4:16.  
23  
24  
25 39. Miyake Y, Tanaka K, Fujiwara H, *et al.* Residential proximity to main roads during pregnancy  
26 and the risk of allergic disorders in Japanese infants: the Osaka Maternal and Child Health  
27 Study. *Pediatr Allergy Immunol* 2010;21:22-28.  
28  
29  
30 40. Canfield MA, Ramadhani TA, Langlois PH, *et al.* Residential mobility patterns and exposure  
31 misclassification in epidemiologic studies of birth defects. *J Sci Environ Epidemiol*,  
32 2006;16:538-543.  
33  
34  
35 41. Madsen C, Gehring U, Walker SE, *et al.* Ambient air pollution exposure, residential mobility  
36 and term birth weight in Oslo, Norway. *Environmental Research*, 2010;110:363-371.  
37  
38  
39 42. Cyrus J, Heinrich J, Richter K, Wolke G, *et al.* Sources and concentrations of indoor nitrogen  
40 dioxide in Hamburg (west Germany) and Erfurt (west Germany). *Sci Total Environ*,  
41 2000;250:51-62.  
42  
43  
44 43. Cyrus J, Eeftens M, Heinrich J, Ampe C, *et al.* Variation of NO<sub>2</sub> and NO<sub>x</sub> concentrations  
45 between and within 36 European study areas: Results from the ESCAPE study. *Atmos*  
46 *Environ*, 2012;62:374-390.  
47  
48  
49  
50  
51  
52  
53  
54  
55  
56  
57  
58  
59  
60

**Table 1.** Descriptive statistics for study participants from the MOBA cohort.

|                                                              | Baseline cohort at birth with NO <sub>2</sub> data (N=17 533) | Questionnaire at 6 months (N=14 386) | Questionnaire at 18 months (N=12 231) |
|--------------------------------------------------------------|---------------------------------------------------------------|--------------------------------------|---------------------------------------|
| Oslo                                                         | 4 669 (26.6)                                                  | 3 801 (26.4)                         | 3 320 (27.1)                          |
| Akershus                                                     | 7 554 (43.1)                                                  | 6 284 (43.7)                         | 5 350 (43.7)                          |
| Bergen                                                       | 3 869 (22.1)                                                  | 3 135 (21.8)                         | 2 591 (21.2)                          |
| Hordaland                                                    | 1 441 (8.2)                                                   | 1 166 (8.1)                          | 970 (7.9)                             |
| LRTI0- 6 months                                              |                                                               | 653 (4.5)                            |                                       |
| Missing                                                      |                                                               | 500 (3.5)                            |                                       |
| LRTI 6- 18 months                                            |                                                               |                                      | 1 469 (12.0)                          |
| Missing                                                      |                                                               |                                      | 230 (1.9)                             |
| Wheeze 6- 18 months                                          |                                                               |                                      | 4 961 (40.6)                          |
| Missing                                                      |                                                               |                                      | 255 (2.1)                             |
| Women who changed address during pregnancy                   | 2 336 (13.3)                                                  | 1 782 (12.4)                         | 1 471 (12.0)                          |
| Parity                                                       |                                                               |                                      |                                       |
| 0                                                            | 8 310 (47.4)                                                  | 6 973 (48.5)                         | 6 003 (49.1)                          |
| 1                                                            | 6 328 (36.1)                                                  | 5 138 (35.7)                         | 4 310 (35.2)                          |
| ≥2                                                           | 2 895 (16.5)                                                  | 2 275 (15.8)                         | 1 918 (15.7)                          |
| Sex of child                                                 |                                                               |                                      |                                       |
| Boy                                                          | 8 925 (50.9)                                                  | 7 285 (50.6)                         | 6 177 (50.5)                          |
| Girl                                                         | 8 608 (49.1)                                                  | 7 101 (49.4)                         | 6 054 (49.5)                          |
| Maternal age at delivery, years                              | 31.0 ± 4.5                                                    | 31.1 ± 4.4                           | 31.2 ± 4.3                            |
| Marital status                                               |                                                               |                                      |                                       |
| Married/cohabiting                                           | 16 780 (95.7)                                                 | 13 839 (96.2)                        | 11 797 (96.5)                         |
| Other                                                        | 753 (4.3)                                                     | 547 (3.8)                            | 434 (3.6)                             |
| Maternal education                                           |                                                               |                                      |                                       |
| Less than high school                                        | 986 (5.6)                                                     | 713 (5.0)                            | 547 (4.5)                             |
| High school                                                  | 4 175 (23.8)                                                  | 3 465 (24.1)                         | 2 845 (23.3)                          |
| Up to 4 years of college                                     | 6 480 (37.0)                                                  | 5 677 (39.5)                         | 4 919 (40.2)                          |
| More than 4 years of college (master or professional degree) | 4 867 (27.8)                                                  | 4 254 (29.6)                         | 3 731 (30.5)                          |
| Missing                                                      | 1 025 (5.9)                                                   | 277 (1.9)                            | 189 (1.6)                             |
| Maternal smoking during pregnancy                            | 1 085 (6.2)                                                   | 843 (5.9)                            | 675 (5.5)                             |
| Missing                                                      | 1 000 (5.7)                                                   | 263 (1.8)                            | 185 (1.5)                             |
| Maternal pre-pregnancy body mass index <sup>a</sup>          | 23.5 ± 3.8                                                    | 23.5 ± 3.7                           | 23.5 ± 3.7                            |
| Maternal atopy                                               | 5 802 (33.1)                                                  | 4 947 (34.4)                         | 4 276 (35.0)                          |
| Season of birth                                              |                                                               |                                      |                                       |
| Winter                                                       | 4 099 (23.4)                                                  | 3 352 (23.3)                         | 2 858 (23.4)                          |
| Spring                                                       | 4 686 (26.7)                                                  | 3 851 (26.8)                         | 3 191 (26.1)                          |
| Summer                                                       | 4 630 (26.4)                                                  | 3 827 (26.6)                         | 3 312 (27.1)                          |
| Autumn                                                       | 4 118 (23.5)                                                  | 3 356 (23.3)                         | 2 870 (23.5)                          |

Numbers are n (%) or mean ± standard deviation.

LRTI – lower respiratory tract infections.

<sup>a</sup>Missing data for maternal pre-pregnancy body mass index (BMI): baseline cohort 1 549 (8.8%), at 6 months 693 (4.8%), at 18 months 522 (4.3%).

**Table 2.** LUR modelled air pollution exposure using residential address at time of birth. Exposure during the whole pregnancy and by trimester.

|                                                                 | <b>Oslo</b>    | <b>Akershus</b> | <b>Bergen</b>  | <b>Hordaland</b> | <b>Total</b>    |
|-----------------------------------------------------------------|----------------|-----------------|----------------|------------------|-----------------|
|                                                                 | <b>N=4 669</b> | <b>N=7 554</b>  | <b>N=3 869</b> | <b>N=1 441</b>   | <b>N=17 533</b> |
| Mean LUR modelled NO <sub>2</sub> exposure (µg/m <sup>3</sup> ) |                |                 |                |                  |                 |
| Whole pregnancy                                                 | 21.6 ± 4.4     | 10.3 ± 3.8      | 13.2 ± 6.2     | 6.3 ± 4.3        | 13.6 ± 6.9      |
| Trimester 1                                                     | 21.7 ± 6.1     | 10.2 ± 4.2      | 13.4 ± 6.4     | 6.5 ± 4.4        | 13.7 ± 7.4      |
| Trimester 2                                                     | 22.0 ± 6.1     | 10.4 ± 4.3      | 13.3 ± 6.5     | 6.3 ± 4.3        | 13.8 ± 7.5      |
| Trimester 3                                                     | 21.5 ± 6.1     | 10.3 ± 4.2      | 13.1 ± 6.3     | 6.3 ± 4.3        | 13.6 ± 7.3      |

Numbers are mean ± standard deviation

LUR – land use regression

European Union air quality standard for NO<sub>2</sub>: 1-year average 40 µg/m<sup>3</sup>

**Table 3.** Associations between pregnancy exposure to NO<sub>2</sub> and respiratory health of children by age 6 and 18 months.

|                                        | Crude   |         |                     | Adjusted |         |                     |
|----------------------------------------|---------|---------|---------------------|----------|---------|---------------------|
|                                        | N total | N cases | RR (95% CI)         | N total  | N cases | RR (95% CI)         |
| <b>Main analysis<sup>a</sup></b>       |         |         |                     |          |         |                     |
| LRTI 0-6 months                        | 13 886  | 653     | 0.84 (0.76 to 0.95) | 13 116   | 616     | 0.99 (0.84 to 1.17) |
| LRTI 6-18 months                       | 12 001  | 1 469   | 0.94 (0.94 to 1.01) | 11 412   | 1 388   | 1.05 (0.94 to 1.16) |
| Wheeze 6-18 months                     | 11 976  | 4 961   | 1.00 (0.97 to 1.03) | 11 387   | 4 712   | 1.02 (0.97 to 1.07) |
| <b>Stratified analysis<sup>b</sup></b> |         |         |                     |          |         |                     |
| <b>Oslo</b>                            |         |         |                     |          |         |                     |
| LRTI 0-6 months                        | 3 695   | 136     | 0.72 (0.51 to 1.02) | 3 530    | 128     | 0.76 (0.54 to 1.06) |
| LRTI 6-18 months                       | 3 246   | 351     | 0.85 (0.69 to 1.06) | 3 111    | 331     | 0.89 (0.71 to 1.12) |
| Wheeze 6-18 months                     | 3 248   | 1 315   | 1.05 (0.96 to 1.16) | 3 111    | 1 253   | 1.04 (0.95 to 1.15) |
| <b>Akershus</b>                        |         |         |                     |          |         |                     |
| LRTI 0-6 months                        | 6 014   | 281     | 1.22 (0.90 to 1.65) | 5 619    | 263     | 1.32 (0.97 to 1.80) |
| LRTI 6-18 months                       | 5 237   | 689     | 1.15 (0.96 to 1.38) | 4 939    | 649     | 1.15 (0.95 to 1.39) |
| Wheeze 6-18 months                     | 5 228   | 2 192   | 1.01 (0.93 to 1.10) | 4 930    | 2 066   | 1.12 (0.94 to 1.34) |
| <b>Bergen</b>                          |         |         |                     |          |         |                     |
| LRTI 0-6 months                        | 3 045   | 169     | 0.90 (0.71 to 1.16) | 2 899    | 161     | 0.96 (0.74 to 1.25) |
| LRTI 6-18 months                       | 2 560   | 318     | 1.00 (0.85 to 1.18) | 2 449    | 301     | 1.04 (0.86 to 1.22) |
| Wheeze 6-18 months                     | 2 548   | 1 073   | 1.00 (0.93 to 1.07) | 2 438    | 1 030   | 1.00 (0.89 to 1.07) |
| <b>Hordaland</b>                       |         |         |                     |          |         |                     |
| LRTI 0-6 months                        | 1 132   | 67      | 0.84 (0.49 to 1.46) | 1 068    | 64      | 0.93 (0.50 to 1.63) |
| LRTI 6-18 months                       | 958     | 111     | 1.31 (0.89 to 1.93) | 913      | 107     | 1.36 (0.88 to 2.03) |
| Wheeze 6-18 months                     | 952     | 381     | 1.19 (1.00 to 1.42) | 908      | 363     | 1.12 (0.94 to 1.34) |

Effect estimates per 10µg/m<sup>3</sup> NO<sub>2</sub>

LRTI – lower respiratory tract infections

<sup>a</sup>Adjusted for maternal age at delivery, years of birth, maternal marital status, maternal education, sex of child, maternal prepregnancy BMI, smoking during pregnancy, parity, maternal atopy and study area.

<sup>b</sup>Adjusted for maternal age at delivery, year of birth, maternal marital status, maternal education, sex of child, maternal prepregnancy BMI, smoking during pregnancy, parity, maternal atopy.

STROBE Statement—Checklist of items that should be included in reports of *cohort studies*

|                              | Item No | Recommendation                                                                                                                                                                                                                                                                                                                                                                                                                                            |
|------------------------------|---------|-----------------------------------------------------------------------------------------------------------------------------------------------------------------------------------------------------------------------------------------------------------------------------------------------------------------------------------------------------------------------------------------------------------------------------------------------------------|
| <b>Title and abstract</b>    | 1       | (a) Indicate the study's design with a commonly used term in the title or the abstract – <a href="#">page 1</a> .<br>(b) Provide in the abstract an informative and balanced summary of what was done and what was found – <a href="#">page 2</a> .                                                                                                                                                                                                       |
| <b>Introduction</b>          |         |                                                                                                                                                                                                                                                                                                                                                                                                                                                           |
| Background/rationale         | 2       | Explain the scientific background and rationale for the investigation being reported – <a href="#">page 4</a> .                                                                                                                                                                                                                                                                                                                                           |
| Objectives                   | 3       | State specific objectives, including any prespecified hypotheses – <a href="#">page 5</a> .                                                                                                                                                                                                                                                                                                                                                               |
| <b>Methods</b>               |         |                                                                                                                                                                                                                                                                                                                                                                                                                                                           |
| Study design                 | 4       | Present key elements of study design early in the paper – <a href="#">page 5</a> .                                                                                                                                                                                                                                                                                                                                                                        |
| Setting                      | 5       | Describe the setting, locations, and relevant dates, including periods of recruitment, exposure, follow-up, and data collection – <a href="#">page 5</a> .                                                                                                                                                                                                                                                                                                |
| Participants                 | 6       | (a) Give the eligibility criteria, and the sources and methods of selection of participants. Describe methods of follow-up – <a href="#">page 5</a> .<br>(b) For matched studies, give matching criteria and number of exposed and unexposed – <a href="#">N.A.</a>                                                                                                                                                                                       |
| Variables                    | 7       | Clearly define all outcomes, exposures, predictors, potential confounders, and effect modifiers. Give diagnostic criteria, if applicable – <a href="#">page 6 and 7</a> .                                                                                                                                                                                                                                                                                 |
| Data sources/<br>measurement | 8*      | For each variable of interest, give sources of data and details of methods of assessment (measurement). Describe comparability of assessment methods if there is more than one group – <a href="#">page 6 and 7</a> .                                                                                                                                                                                                                                     |
| Bias                         | 9       | Describe any efforts to address potential sources of bias – <a href="#">N.A.</a>                                                                                                                                                                                                                                                                                                                                                                          |
| Study size                   | 10      | Explain how the study size was arrived at – <a href="#">page 5</a> .                                                                                                                                                                                                                                                                                                                                                                                      |
| Quantitative variables       | 11      | Explain how quantitative variables were handled in the analyses. If applicable, describe which groupings were chosen and why – <a href="#">page 6</a> .                                                                                                                                                                                                                                                                                                   |
| Statistical methods          | 12      | (a) Describe all statistical methods, including those used to control for confounding – <a href="#">page 8</a> .<br>(b) Describe any methods used to examine subgroups and interactions – <a href="#">page 8</a> .<br>(c) Explain how missing data were addressed – <a href="#">page 7</a> .<br>(d) If applicable, explain how loss to follow-up was addressed – <a href="#">N.A.</a><br>(e) Describe any sensitivity analyses – <a href="#">page 8</a> . |
| <b>Results</b>               |         |                                                                                                                                                                                                                                                                                                                                                                                                                                                           |
| Participants                 | 13*     | (a) Report numbers of individuals at each stage of study—eg numbers potentially eligible, examined for eligibility, confirmed eligible, included in the study, completing follow-up, and analysed – <a href="#">page 5 and Table 1</a> .<br>(b) Give reasons for non-participation at each stage – <a href="#">page 5</a> .<br>(c) Consider use of a flow diagram – <a href="#">N.A.</a>                                                                  |
| Descriptive data             | 14*     | (a) Give characteristics of study participants (eg demographic, clinical, social) and information on exposures and potential confounders – <a href="#">page 8 and 9</a> .<br>(b) Indicate number of participants with missing data for each variable of interest – <a href="#">page 5</a> .<br>(c) Summarise follow-up time (eg, average and total amount) – <a href="#">page 5</a> .                                                                     |
| Outcome data                 | 15*     | Report numbers of outcome events or summary measures over time – <a href="#">page 8 and Table 1</a> .                                                                                                                                                                                                                                                                                                                                                     |
| Main results                 | 16      | (a) Give unadjusted estimates and, if applicable, confounder-adjusted estimates and                                                                                                                                                                                                                                                                                                                                                                       |

|                          |    |                                                                                                                                                                                                       |
|--------------------------|----|-------------------------------------------------------------------------------------------------------------------------------------------------------------------------------------------------------|
|                          |    | their precision (eg, 95% confidence interval). Make clear which confounders were adjusted for and why they were included – <a href="#">pages 8-9, Figure 1 and Tables 2-3.</a>                        |
|                          |    | (b) Report category boundaries when continuous variables were categorized – <a href="#">page 8 and 9.</a>                                                                                             |
|                          |    | (c) If relevant, consider translating estimates of relative risk into absolute risk for a meaningful time period – <a href="#">N.A.</a>                                                               |
| Other analyses           | 17 | Report other analyses done—eg analyses of subgroups and interactions, and sensitivity analyses – <a href="#">page 9.</a>                                                                              |
| <b>Discussion</b>        |    |                                                                                                                                                                                                       |
| Key results              | 18 | Summarise key results with reference to study objectives – <a href="#">page 9.</a>                                                                                                                    |
| Limitations              | 19 | Discuss limitations of the study, taking into account sources of potential bias or imprecision. Discuss both direction and magnitude of any potential bias – <a href="#">page 11.</a>                 |
| Interpretation           | 20 | Give a cautious overall interpretation of results considering objectives, limitations, multiplicity of analyses, results from similar studies, and other relevant evidence – <a href="#">page 11.</a> |
| Generalisability         | 21 | Discuss the generalisability (external validity) of the study results – <a href="#">page 10-11.</a>                                                                                                   |
| <b>Other information</b> |    |                                                                                                                                                                                                       |
| Funding                  | 22 | Give the source of funding and the role of the funders for the present study and, if applicable, for the original study on which the present article is based – <a href="#">page 12.</a>              |

\*Give information separately for exposed and unexposed groups.

**Note:** An Explanation and Elaboration article discusses each checklist item and gives methodological background and published examples of transparent reporting. The STROBE checklist is best used in conjunction with this article (freely available on the Web sites of PLoS Medicine at <http://www.plosmedicine.org/>, Annals of Internal Medicine at <http://www.annals.org/>, and Epidemiology at <http://www.epidem.com/>). Information on the STROBE Initiative is available at <http://www.strobe-statement.org>.

# BMJ Open

## Pregnancy exposure to air pollution and early childhood respiratory health in the Norwegian Mother and Child Cohort Study (MoBa)

|                                 |                                                                                                                                                                                                                                                                                                                                                                                                                                                                                                                                                                                                                                                                                                                                                                                                                                                                                |
|---------------------------------|--------------------------------------------------------------------------------------------------------------------------------------------------------------------------------------------------------------------------------------------------------------------------------------------------------------------------------------------------------------------------------------------------------------------------------------------------------------------------------------------------------------------------------------------------------------------------------------------------------------------------------------------------------------------------------------------------------------------------------------------------------------------------------------------------------------------------------------------------------------------------------|
| Journal:                        | <i>BMJ Open</i>                                                                                                                                                                                                                                                                                                                                                                                                                                                                                                                                                                                                                                                                                                                                                                                                                                                                |
| Manuscript ID                   | bmjopen-2016-015796.R3                                                                                                                                                                                                                                                                                                                                                                                                                                                                                                                                                                                                                                                                                                                                                                                                                                                         |
| Article Type:                   | Research                                                                                                                                                                                                                                                                                                                                                                                                                                                                                                                                                                                                                                                                                                                                                                                                                                                                       |
| Date Submitted by the Author:   | 01-Aug-2017                                                                                                                                                                                                                                                                                                                                                                                                                                                                                                                                                                                                                                                                                                                                                                                                                                                                    |
| Complete List of Authors:       | Madsen, Christian; Nasjonalt folkehelseinstitutt, Department of Health and Inequality<br>Håberg, Siri; Nasjonalt folkehelseinstitutt, Domain for Mental and Physical Health<br>Magnus, Maria; Nasjonalt folkehelseinstitutt, Department of Chronic Diseases<br>Aamodt, Geir; Norwegian University of Life Sciences, Department of Landscape Architecture and Spatial Planning<br>Stigum, Hein; Norwegian Institute of Public Health, Department of Chronic Diseases; University of Oslo, Department of Community Medicine and Global Health<br>London, Stephanie J.; National Institute of Environmental Health Sciences, Epidemiology<br>Nystad, Wenche; Nasjonalt folkehelseinstitutt, Department of Chronic Diseases<br>Nafstad, Per; Nasjonalt folkehelseinstitutt, Department of Chronic Diseases; University of Oslo, Department of Community Medicine and Global Health |
| <b>Primary Subject Heading</b>: | Epidemiology                                                                                                                                                                                                                                                                                                                                                                                                                                                                                                                                                                                                                                                                                                                                                                                                                                                                   |
| Secondary Subject Heading:      | Reproductive medicine                                                                                                                                                                                                                                                                                                                                                                                                                                                                                                                                                                                                                                                                                                                                                                                                                                                          |
| Keywords:                       | air pollution, NO2, pregnancy, lower respiratory tract infections, wheezing, The Norwegian Mother and Child Cohort Study                                                                                                                                                                                                                                                                                                                                                                                                                                                                                                                                                                                                                                                                                                                                                       |
|                                 |                                                                                                                                                                                                                                                                                                                                                                                                                                                                                                                                                                                                                                                                                                                                                                                                                                                                                |

SCHOLARONE™  
Manuscripts

1  
2  
3 **Pregnancy exposure to air pollution and early childhood respiratory health**  
4  
5 **in the Norwegian Mother and Child Cohort Study (MoBa)**  
6  
7  
8  
9

10 Christian Madsen<sup>a</sup>, Siri Eldevik Håberg<sup>a</sup>, Maria C. Magnus<sup>a</sup>, Geir Aamodt<sup>b</sup>, Hein Stigum<sup>a,c</sup>, Stephanie  
11 J. London<sup>d</sup>, Wenche Nystad<sup>a</sup>, Per Nafstad<sup>a,c</sup>  
12  
13

14  
15  
16 <sup>a</sup> Domain for Mental and Physical Health, Norwegian Institute of Public Health, Oslo, Norway  
17

18 <sup>b</sup> Department of Landscape Architecture and Spatial Planning, Norwegian University of Life Sciences,  
19 Ås, Norway  
20

21  
22 <sup>c</sup> Department of Community Medicine and Global Health, Medical Faculty, University of Oslo, Oslo,  
23 Norway  
24

25  
26 <sup>d</sup> National Institute of Environmental Health Sciences, National Institutes of Health, Department of  
27 Health and Human Services, Research Triangle Park, North Carolina, USA  
28  
29  
30  
31  
32  
33  
34  
35  
36  
37  
38  
39  
40  
41

42 Correspondence to:

43 Christian Madsen

44  
45  
46 Tel. +4721078060

47  
48 E-mail: [christian.madsen@fhi.no](mailto:christian.madsen@fhi.no)  
49

50 Department of Health and Inequality,  
51

52 Domain for Mental and Physical Health,  
53

54 Norwegian Institute of Public Health,  
55

56 P.O. Box 4404 Nydalen, N-0403 Oslo, Norway.  
57  
58  
59  
60



## Abstract

**Objectives** It is unclear whether maternal air pollution exposure during pregnancy induces changes in the developing respiratory system of a child and whether it has consequences for respiratory health in early childhood. We investigated associations between exposure to moderate levels of air pollution during pregnancy and early childhood lower respiratory tract infections (LRTI) and wheezing.

**Methods** This study used a sub-group of 17 533 participants in the Norwegian Mother and Child Cohort Study (MoBa). Air pollution levels at residential addresses were estimated using land use regression (LUR) models, and back-extrapolated to the period of each pregnancy. Information on LRTI and wheezing, and lifestyle factors was collected from questionnaires completed by mothers during pregnancy and when the child was 6 and 18 months of age.

**Results** Moderate mean levels of NO<sub>2</sub> (13.6 µg/m<sup>3</sup>, range 0.01 to 60.4) exposure at residential address during pregnancy were not statistically associated with LRTI and wheezing. No association was found per 10 µg/m<sup>3</sup> change in NO<sub>2</sub> exposure and LRTI before age 6 months (adjusted RR 0.99; 95% CI 0.84 to 1.17), or between 6-18 months of age (adjusted RR 1.05; 95% CI 0.94 to 1.16). Similarly, we found no association per 10 µg/m<sup>3</sup> change in NO<sub>2</sub> exposure and wheezing between 6-18 months of age (adjusted RR 1.02; 95% CI 0.97 to 1.07).

**Conclusions** There were no statistically significant associations for moderate levels of pregnancy NO<sub>2</sub> exposure and respiratory health outcomes during early childhood in overall analyses.

**Strengths and limitations of this study**

- Large prospective cohort with data on lower respiratory tract infections, with additional linked data from medical birth registry.
- Land use regression modelled traffic exposure assessment at residential address using both spatial and temporal adjustment.
- Cohort living in areas with low to moderate air pollution concentrations.
- Unable to account for any changes in address location and pollution exposure during pregnancy.

## Introduction

There is increasing evidence from both experimental and epidemiologic studies that the prenatal period is a critical window for harmful effects from different types of exposures on respiratory health.<sup>1</sup> Lower respiratory tract infections (LRTI) are common in infants and young children.<sup>2</sup> They are caused primarily by viral pathogens and are clinically expressed as bronchiolitis, or pneumonia.<sup>2</sup> Childhood wheeze is a symptom of several heterogeneous conditions, and may occur during viral respiratory infections or be associated with atopy.<sup>3</sup> Infections and wheeze are also closely related in young children. Respiratory diseases in early childhood may have long term consequences, accounting for a significant proportion of adult lung disease.<sup>2,4</sup> Special attention should be given to modifiable factors that may influence lung development at crucial stages (prenatally and postnatally). Numerous epidemiologic studies have shown that children exposed to tobacco smoke or higher levels of ambient air pollution above recommended levels (e.g. standards from the EU or the WHO) are more prone to develop respiratory disorders.<sup>5-7</sup> Air pollution may affect the lungs by inducing low-grade systemic inflammation and oxidative stress,<sup>8</sup> leading to pathological changes in the respiratory system. Children are particularly susceptible due to the continuous development of lungs that takes place from embryogenesis to early adolescence,<sup>4,9</sup> and continuous immune system development.<sup>10</sup> Of particular interest is intrauterine exposure, where air pollution may indirectly affect the developing lung tissue of the foetus.<sup>11,12</sup>

There is an ongoing interest in whether exposure to ambient air pollution during pregnancy might influence respiratory health in early childhood.<sup>13</sup> The effect of air pollution exposure during pregnancy on respiratory health and allergic responses early in life has been examined by several studies with large heterogeneity.<sup>14-19</sup> Some studies report associations of prenatal air pollution exposure with LRTI in early childhood.<sup>14-17</sup> Other studies have found no support for an association between air pollution exposure and LRTI in early childhood.<sup>18,19</sup> In addition, there are animal exposure studies that have identified both anatomic/mechanical and immunological mechanisms by which air pollution exposure may increase susceptibility of the respiratory system to infections.<sup>20,21</sup>

In this study, we investigated the associations between estimated exposure to traffic-related air pollution during pregnancy and early childhood respiratory health (LRTI and wheeze) in selected

1  
2  
3 urban and county areas of Norway. Norway is characterized by relatively low levels of air pollution,<sup>22</sup>  
4  
5 and it is of interest whether low levels might interfere with intrauterine respiratory system  
6  
7 development and affect respiratory health later in life.  
8  
9

## 10 11 **Methods**

### 12 13 *Study population*

14  
15 The Norwegian Mother and Child Cohort Study (MoBa) is a prospective population-based pregnancy  
16  
17 cohort study conducted by the Norwegian Institute of Public Health.<sup>22</sup> Pregnant women were recruited  
18  
19 from all over Norway from 1999 to 2008. Among invited women, 41% consented to participate.  
20  
21 Mothers could participate with more than one child, resulting in 114 500 children and 95 200 mothers  
22  
23 included in the cohort.  
24

25  
26 All participants living in our study areas (Oslo, Bergen, Akershus, and Hordaland) were  
27  
28 eligible for our study (N=22 149, 23.3%). We excluded participants with missing NO<sub>2</sub> exposure  
29  
30 information (N=3 876), multiple births (N=664) and non-live births (N=76). Only data on singleton  
31  
32 live births were used in the analyses. Total number of participants from the four study areas was  
33  
34 17 533 (79%). Pregnancy-related information was obtained from the Medical Birth Registry of  
35  
36 Norway (MBRN).  
37

38  
39 Mothers participating in the MoBa study completed a number of questionnaires during follow-  
40  
41 up. We used data on lifestyle characteristics from the first questionnaire completed at recruitment  
42  
43 (approximately at week 17-18 of pregnancy) and another questionnaire completed at week 30 of  
44  
45 pregnancy. Information on the respiratory outcomes was collected from maternal questionnaires  
46  
47 completed when the child was 6 and 18 months of age. The children were born from 2001 to 2009, 14  
48  
49 386 mothers had returned the questionnaire at 6 months, and 12 231 had returned the questionnaire at  
50  
51 18 months (Table 1).  
52

53  
54 The study was approved by the regional Ethics committee and the Norwegian Data  
55  
56 Inspectorate. The current study is based on versions VI (pregnancy data) and VIII (respiratory  
57  
58 outcomes) of the quality-assured data files released for research on the 15<sup>th</sup> April 2011 and on the 14<sup>th</sup>  
59  
60 February 2014, respectively.

## 2.2 Outcomes and covariates

The outcomes, LRTI and wheeze, were based on the maternal report from questionnaires filled when children were 6 and 18 months of age. The questionnaires can be viewed at the MoBa website (<https://www.fhi.no/en/studies/moba/>). LRTIs included respiratory syncytial virus, bronchiolitis, bronchitis, and pneumonia. We classified hospitalization for any of these conditions as being hospitalized for LRTI at a) between 0-6 months of age, and b) between 6-18 months of age. Wheeze was defined as “wheezing/whistling in the chest” or “tightness in the chest” between 6 and 18 months of age. The outcomes were treated as dichotomous.

The following characteristics were extracted from the MBRN: parity defined as number of previous deliveries (0; 1;  $\geq 2$ ), mother’s age at birth (years), marital status (married/cohabiting; other), sex of the child (boy; girl), and year of birth. Questionnaire information was used to determine: maternal education (less than high school; high school; up to 4 years of college; more than 4 years of college (master or professional degree)), maternal smoking during pregnancy (never; any smoking during pregnancy), maternal weight at the beginning of pregnancy (kg) and maternal height (m) were used to calculate body mass index (BMI) (maternal weight divided by squared maternal height), maternal atopy (ever having hay fever, pollen allergy, atopic dermatitis, allergy to animal hair, other types of allergy, or asthma).

Adjustment variables (Table 1) were selected based on literature analyses and included maternal age at delivery, maternal marital status, maternal education, sex of child, maternal pre-pregnancy BMI, parity, year of birth, smoking during pregnancy, maternal atopy, and area.

### *Air pollution exposure*

In this study, we used LUR modeled exposure to traffic-related pollutant NO<sub>2</sub> at the residential address at the time of delivery for women included in MoBa. Separate models were developed for four of the recruitment areas: the two biggest cities in Norway (Oslo and Bergen) and their surrounding counties (Akershus and Hordaland).<sup>23</sup>

1  
2  
3 Estimates of air pollution exposure during pregnancy were based on the methodology  
4 developed for the ESCAPE project.<sup>24,25</sup> Land use regression (LUR) models for NO<sub>2</sub> levels were built  
5 for each of the studied areas in order to account for regional specifics.<sup>23</sup> Sampling of air pollution is  
6 done retrospectively since it was not part of the MoBa design. We measured the spatial distribution of  
7 air pollution for Oslo and Akershus in 2010, and for Bergen and Hordaland in 2011. Measurement  
8 campaigns included three rounds of approximately two weeks duration with NO<sub>2</sub> measurements  
9 (during winter, summer and an intermediate season) within a one year period. Measurement sites (14  
10 in Oslo, 36 in Akershus and 46 in Bergen/Hordaland) were selected to represent the range of  
11 residential exposure for each study area. In the analyses, we included sites with no missing data, and  
12 no geocoding mismatches. The models provided adjusted  $R^2$  in the range of 55 – 85 %, and more  
13 details of these models is described elsewhere.<sup>23</sup>

14  
15  
16  
17  
18  
19  
20  
21  
22  
23  
24  
25 LUR models were built separately for Oslo and Akershus. Only one model was built for the  
26 whole Hordaland County (including the city Bergen) due to a low number of valid measurement sites  
27 outside Bergen. Predictors for building the LUR model were obtained from a geographical information  
28 system (GIS) analyses of the N50 and VBASE maps (received in February 2013) providing  
29 information on land use, residential density, types of landscape and road network information. We  
30 built multiple linear regression models and performed diagnostic model tests according to the method  
31 described by Beelen and colleagues.<sup>24</sup>

32  
33  
34  
35  
36  
37  
38  
39  
40  
41  
42  
43  
44  
45  
46  
47  
48  
49  
50  
51  
52  
53  
54  
55  
56  
57  
58  
59  
60

Yearly means of air pollution levels at residential address at birth were estimated using the  
resulting LUR models. Variables in models were truncated in accordance to the range of  
corresponding variables used for LUR model building. Negative modelled values were replaced with  
0.01 to avoid the unlikely scenario of negative modelled exposure and keep these in the analyses as  
low exposed addresses (N=112).<sup>23</sup> The true exposure from NO<sub>2</sub> at these addresses are most likely at  
the low end of the scale. In order to account for temporal variability, we used the ratio method of  
back-extrapolation to the period of each pregnancy using continuous routine monitoring station data.<sup>25</sup>  
Daily NO<sub>2</sub> measurements were obtained from the Norwegian Institute for Air Research database  
“Luftkvalitet.info” for the period 2000 - 2012 in Oslo (used for Oslo and Akershus), and for the period  
2003 - 2012 in Bergen (used for Bergen and Hordaland). Daily estimates of exposure were calculated

1  
2  
3 using the ratio method of back-extrapolation: the LUR-modelled yearly estimate multiplied by the  
4 ratio between daily NO<sub>2</sub> routine monitoring station measurement and an annual average for the year  
5 when LUR measurement campaign took place. Daily NO<sub>2</sub> exposure estimates were averaged  
6  
7 separately for 1<sup>st</sup>, 2<sup>nd</sup>, and 3<sup>rd</sup> trimester, and also over the whole pregnancy.  
8  
9  
10

### 11 12 13 *Statistical analysis*

14  
15 Generalized linear models was fitted to evaluate the associations between pregnancy NO<sub>2</sub> exposure  
16 and respiratory outcomes. Results are presented for crude and adjusted models as risk ratios (RR) with  
17 robust standard errors. Multiplicative interactions were tested in the adjusted models between the  
18 continuous NO<sub>2</sub> pregnancy exposure variable and the following categorical variables: area, sex,  
19 smoking during pregnancy, parity, birth season and maternal atopy.  
20  
21  
22  
23  
24

25 Sensitivity analyses were performed by a) restricting the analyses to women who did not  
26 change address during pregnancy, and b) restricting the analyses to pregnancies during the last period  
27 (2006-2008) of the MoBa recruitment, thus closer in time to the exposure campaign and GIS-  
28 variables.  
29  
30  
31  
32

33 Area variable was defined by the location of the address at delivery: Oslo, Akershus, Bergen  
34 and Hordaland. In a previous study, the area variable was found to be an important factor in  
35 attenuating the associations between exposure and birth outcome in MoBa<sup>23</sup> These differences by area  
36 could be linked to more travel to and from work and to other activities, visiting central more polluted  
37 parts of the city by e.g. higher educated women and for city dwellers per se. This variable is included  
38 in the adjusted models since it previously has been reported to be a potential proxy for unmeasured  
39 factors that could vary between each study area and thus could influence the outcome variables within  
40 each separate area. Still, area may also reflect the spatial distribution of air pollution, and thus result in  
41 overadjustment bias on the path between exposure and outcome.<sup>26</sup> We therefore performed a separate  
42 post hoc analysis by excluding the area variable from the adjusted model. In addition, we performed  
43 exploratory analyses post hoc by area, sex of child, parity, season of birth, and maternal atopy.  
44  
45  
46  
47  
48  
49  
50  
51  
52  
53  
54

55 We used ArcGIS10.1 software (Esri, CA, USA) for GIS analyses; statistical analyses were  
56 performed using STATA 13.0 (StataCorp, Texas, USA).  
57  
58  
59  
60

## Results

The study population included in this study consisting of participants from the four study areas of Norway with pregnancy air pollution exposure data had similar characteristics as the whole MoBa cohort study with information from 6 months and at 18 months (Table 1). A total of 4.5% of children had LRTI between 0-6 months of age, and 12% of children had LRTI between 6-18 months of age. A total of 40.6% of the children had wheezing symptoms between 6 and 18 months of age.

The majority (86.7%) of the women did not change address during pregnancy. Maternal smoking in pregnancy was relatively uncommon (6.2%). Maternal atopy was reported in 33.1% of the women (Table 1). The distribution of the study population across birth seasons reflects the timing of recruitment into MoBa and we therefore observe slight deviation from the equal seasonal distribution.

Mean NO<sub>2</sub> exposure during whole pregnancy was  $13.6 \pm 6.9 \mu\text{g}/\text{m}^3$  NO<sub>2</sub>, which is well below the European Union air quality yearly average standard of  $40 \mu\text{g}/\text{m}^3$  NO<sub>2</sub>. The range of NO<sub>2</sub> spanned from 0.01 thru  $60.4 \mu\text{g}/\text{m}^3$ , with a total of 27 children with concentrations equal or above  $40 \mu\text{g}/\text{m}^3$  at their residential address. Exposures by trimester and the whole pregnancy exposure (Table 2) were highly correlated ( $r = 0.73$  to  $0.85$ ). We therefore decided to use only the average NO<sub>2</sub> exposure during the whole pregnancy as our exposure estimate in the analyses.

We found no associations of NO<sub>2</sub> exposure during pregnancy with LRTI at 0-6 months, LRTI at 6-18 months, or wheeze at 6-18 months in the overall analyses (Table 3). The main covariates affecting the change in significance of risk ratio estimate from the crude to the adjusted models were parity and area. In the stratified analyses by area we observed a consistent pattern, although not statistically significant, of positive associations for LRTI and wheeze for participants living outside big cities, in Akershus and Hordaland (Table 3). An analysis of the cumulative incidence of LRTI (0-18 months of age) was equal to an RR= 1.04 (95% CI 0.93, 1.17).

There was no evidence of effect modification by the adjustment variables. Stratified analyses post hoc by maternal atopy status and birth season did not identify any important differences between the groups. No statistically significant interactions were detected between NO<sub>2</sub> exposure and maternal atopy, sex of child, area, birth season, or parity. Sensitivity analyses resulted in no substantial changes



1  
2  
3 compared to the reported results. Excluding from the adjustment set the area variable, as a factor  
4 potentially reflecting spatial distribution of air pollution, did not considerably change the results.  
5  
6 Restricting the analyses to pregnancies during the last period of the MoBa recruitment (2006-2008)  
7  
8 did not result in substantial changes to the reported results.  
9  
10

## 11 12 13 **Discussion**

14  
15 In this study, we found no statistically significant associations for pregnancy NO<sub>2</sub> exposure to traffic-  
16 related air pollution exposure at residential address at birth and LRTI or wheeze in early childhood.  
17

18  
19 A previously study by Esplugues and colleagues has reported similar results of no association  
20 between LUR-modelled prenatal NO<sub>2</sub> exposure (with higher than in our study whole pregnancy mean  
21 NO<sub>2</sub> values of 39.1µg/m<sup>3</sup>) with LRTI or persistent cough during the 1<sup>st</sup> year of life, but they did report  
22 an association between postnatal NO<sub>2</sub> exposure and persistent cough.<sup>18</sup> In the large international  
23 ESCAPE study, uniting cohorts from Germany, Sweden, Netherlands, and the UK, decrease in lung  
24 function parameters has been associated with exposure to LUR-modelled annual average NO<sub>2</sub>, NO<sub>x</sub>,  
25 PM<sub>2.5</sub> absorbance, and PM<sub>2.5</sub> at current address at 6 - 8 years of age, but not at birth address.<sup>27</sup>  
26  
27  
28  
29  
30  
31  
32  
33  
34

35  
36 We found some indication of different patterns for associations between prenatal air pollution  
37 exposure and early respiratory health in study participants living in cities versus counties outside  
38 cities. Associations between prenatal air pollution exposure and the respiratory outcomes was overall  
39 greater in the non-urban areas, although the estimates were not statistically significant. This might be  
40 due to a higher misclassification of exposure in cities because of higher mobility (change of residential  
41 address), or due to other types of pollutants in non-urban areas.<sup>28</sup> A study by Canfield and colleagues  
42 (2006) reported higher mobility for nullparious women as compared to women with several children.  
43 They explained this as related to the need for larger homes due to expecting a child (first born) and a  
44 need to live closer to health care facilities.<sup>29</sup> A previous study from Norway reported that half of the  
45 mothers work during pregnancy and that no difference was found when comparing using only home  
46 address to a weighted exposure of home and work address exposure.<sup>30</sup> On the other hand, non-city  
47 population might have more homogenous exposure and spending more time close to home. Difference  
48  
49  
50  
51  
52  
53  
54  
55  
56  
57  
58  
59  
60

1  
2  
3 in distribution of socioeconomic factors or parity might play a role: families with several children tend  
4  
5 to move out of large cities in Norway. Familiar predisposition to allergic disorders may be an  
6  
7 important factor in modifying the effect of tobacco smoke exposure on wheezing.<sup>31</sup> Certain months of  
8  
9 birth, due to their correlation with viral infections seasons, can be a risk factor for wheezing and  
10  
11 LRTI.<sup>3 32</sup> Our study found no differences in the effect from groups divided by maternal atopy status or  
12  
13 birth season.

14  
15 Our study applied standardized individual exposure assessment for the large study population,  
16  
17 and detailed information on potential confounders was collected from prenatal questionnaires.  
18  
19 Estimates for prenatal exposure to NO<sub>2</sub> were based on LUR models and temporal back-extrapolation  
20  
21 of exposure during entire pregnancy at the address at birth. The NO<sub>2</sub> exposure was collected during  
22  
23 2010 and 2011, and the GIS-variables used in the modelling were collected in 2013. The modelled  
24  
25 exposures at each address were back-extrapolated using fixed 24-hour monitoring data from each area  
26  
27 in the period 1999-2009. Such estimates might be a subject to non-differential misclassification of  
28  
29 exposure due to changes in GIS-variables, or differences in the participant's mobility and lifestyle  
30  
31 factors. However, results of the sensitivity analyses only in women who did not change address during  
32  
33 pregnancy were similar to the overall analyses. Likewise, restricting the analyses to pregnancies  
34  
35 during the last period, closer in time to the collected exposure variables and GIS-variables, did not  
36  
37 result in different associations than the overall analyses.  
38

39  
40 In epidemiological studies investigating air pollution effects, precision of exposure estimation  
41  
42 is an important challenge. It is usually not feasible to sample personal air pollution exposure in large  
43  
44 birth cohorts, mainly due to the amount of participants needed and due to the fact of not having  
45  
46 information about the pregnancy before week 17. It has therefore become increasingly common to  
47  
48 apply modelling of air pollution exposure at individual residential addresses, such as dispersion  
49  
50 models and LUR models. High correlations have previously been reported between indoor and  
51  
52 outdoor concentrations of NO<sub>2</sub>,<sup>33</sup> and NO<sub>2</sub> is also reported to display higher spatial variation as  
53  
54 compared to other pollutants,<sup>34</sup> thus making it a better proxy for individual air pollution exposure.  
55

56  
57 The mean air pollution exposure levels explored in this study may be relatively low for  
58  
59 detecting the association between prenatal exposure and postnatal respiratory health, and the reported  
60

1  
2  
3 effect estimates might be biased towards null due to non-differential misclassification of exposure. It  
4  
5 could also be difficult to disentangle prenatal and early postnatal exposure to air pollution if family  
6  
7 continues to live at the same address at these two periods. Prenatal exposures need to be carefully  
8  
9 studied for identifying potential critical windows of exposure. In our data, exposures by trimester were  
10  
11 highly correlated with whole pregnancy exposure, and therefore we only assessed the exposure during  
12  
13 entire pregnancy. More studies are needed for exploring the causative association between prenatal air  
14  
15 pollution exposure and respiratory health early in childhood, for characterizing critical time windows  
16  
17 and main pollutants that are involved in pathological changes. Of interest for future research is the sex  
18  
19 difference in prenatal exposure effect identified in our study.

20  
21 In this large Norwegian pregnancy cohort we found no statistically significant associations for  
22  
23 moderate levels of exposure to NO<sub>2</sub> during pregnancy and childhood respiratory health measured by  
24  
25 LRTI and wheeze.

26  
27  
28  
29 **Acknowledgements:** The co-authors would like to express gratitude to all MoBa cohort participants  
30  
31 and research team, to Sviatlana Panasevich and Jon Wickmann at NIPH for their help with the  
32  
33 database management, and to the Norwegian Institute for Air Research team for providing valuable  
34  
35 research data thru their national air quality database. The authors also wants to thank the reviewers for  
36  
37 their valuable comments.

38  
39  
40  
41 **Contribution to authorship:** PN, SJL, WN, PM were involved in conception, hypothesis delineation  
42  
43 and study design. SJL, GA, SEH, CM contributed to the exposure assessment. CM and PN drafted the  
44  
45 manuscript. All authors were involved in data interpretation and approved the final submitted version  
46  
47 of the manuscript.

48  
49  
50  
51 **Funding:** The Norwegian Mother and Child Cohort Study is supported by the Norwegian Ministry of  
52  
53 Health and the Ministry of Education and Research, NIH/NIEHS (contract no N01-ES-75558),  
54  
55 NIH/NIDS (grant no.1 UO1NS 047537-01 and grant no.2 UO1 NS 047537-06A1). This study was  
56  
57 also supported by the Research Council of Norway (grant no.196102) and the Intramural Research  
58  
59

1  
2  
3 Program of the NIH, National Institute of Environmental Health Sciences (project number Z01  
4  
5 ES49019).

6  
7  
8  
9 **Details of ethics approval:** The Norwegian Mother and Child Cohort Study has approvals from the  
10  
11 Regional Ethics Committee and the Norwegian Data Inspectorate. The current study is based on  
12  
13 version VI of the quality-assured data files released for research on the 15<sup>th</sup> April 2011.

14  
15  
16  
17 **Data sharing statement:** Technical description of the MoBa data can be found at the study website  
18  
19 (<https://www.fhi.no/en/studies/moba/>). Researchers can apply for access to the dataset  
20  
21 (<https://www.fhi.no/en/more/research--access-to-data/>). Statistical code is available upon request from  
22  
23 the corresponding author.  
24

25  
26  
27 **Competing interests:** none declared.  
28  
29

## 30 31 32 **References**

- 33 1. Pinkerton KE, Joad JP. Influence of air pollution on respiratory health during perinatal  
34 development. *Clin Exp Pharmacol Physiol* 2006;33:269–272.
- 35 2. Graham NM. The epidemiology of acute respiratory infections in children and adults: a global  
36 perspective. *Epidemiol Rev* 1990;12:149-178.
- 37 3. Sherriff A, Peters TJ, Henderson J, *et al*. Risk factor associations with wheezing patterns in  
38 children followed longitudinally from birth to 3(1/2) years. *Int J Epidemiol* 2001;30:1473-  
39 1484.
- 40 4. Merkus PJ. Effects of childhood respiratory diseases on the anatomical and functional  
41 development of the respiratory system. *Paediatr Respir Rev*, 2003;4:28-39.
- 42 5. Carlsen KH, Carlsen KC. Respiratory effects of tobacco smoking on infants and young  
43 children. *Paediatr Respir Rev*, 2008;9:11-20.
- 44 6. Goldizen FC, Knibbs LD, Sly PD. Respiratory effects of air pollution on children. *Pediatr*  
45  
46  
47  
48  
49  
50  
51  
52  
53  
54  
55  
56  
57  
58  
59  
60  
*Pulmonol* 2016;51:94-108.

- 1  
2  
3 7. MacIntyre EA, Gehring U, Molter A, *et al.* Air pollution and respiratory infections during  
4  
5 early childhood: an analysis of 10 European birth cohorts within the ESCAPE Project.  
6  
7 *Environ Health Perspect* 2014;122:107-113.  
8
- 9 8. Brook RD, Rajagopalan S, Pope CA, *et al.* Particulate matter air pollution and cardiovascular  
10  
11 disease: An update to the scientific statement from the American Heart Association.  
12  
13 *Circulation* 2010;121:2331-2378.  
14
- 15 9. Pinkerton KE, Joad JP. Influence of air pollution on respiratory health during perinatal  
16  
17 development. *Clin Exp Pharmacol Physiol* 2006;33:269-272.  
18
- 19 10. Goenka A, Kollmann TR. Development of immunity in early life. *J Infect* 2015;71:S112-120.  
20
- 21 11. Nelly D, Plusquin M, xx, *et al.* In Utero Fine Particle Air Pollution and Placental Expression  
22  
23 of Genes in the Brain-Derived Neurotrophic Factor Signaling Pathway: An ENVIRONAGE  
24  
25 Birth Cohort Study. *Environ Health Perspect* 2015;123:834-840.  
26
- 27 12. Veras MM, Damaceno-Rodrigues NR, Caldini EG, *et al.* Particulate Urban Air Pollution  
28  
29 Affects the Functional Morphology of Mouse Placenta. *BIOLOGY OF REPRODUCTION*  
30  
31 2008;79:578-584.  
32
- 33 13. Proietti E, Roosli M, Frey U, *et al.* Air Pollution During Pregnancy and Neonatal Outcome: A  
34  
35 Review. *Journal of Aerosol Medicine and Pulmonary Drug Delivery* 2013;26:9-23.  
36
- 37 14. Nordling E, Berglind N, Melen E, *et al.* Traffic-related air pollution and childhood respiratory  
38  
39 symptoms, function and allergies. *Epidemiology* 2008;19:401-408.  
40
- 41 15. Jedrychowski W, Perera F, Maugeri U, *et al.* Effects of prenatal and perinatal exposure to fine  
42  
43 air pollutants and maternal fish consumption on the occurrence of infantile eczema. *Int Arch*  
44  
45 *Allergy Immunol* 2011;155:275-281.  
46
- 47 16. Aguilera I, Pedersen M, Garcia-Esteban R, *et al.* Early-Life Exposure to Outdoor Air  
48  
49 Pollution and Respiratory Health, Ear Infections, and Eczema in Infants from the INMA  
50  
51 Study. *Environ Health Perspect* 2013;121:387-392.  
52
- 53 17. Rice MB, Rifas-Shiman SL, Oken E, *et al.* Exposure to traffic and early life respiratory  
54  
55 infection: A cohort study. *Pediatr Pulmonol* 2014;50:252-259.  
56  
57  
58  
59  
60

- 1  
2  
3 18. Esplugues A, Ballester F, Estarlich M, *et al.* Outdoor, but not indoor, nitrogen dioxide  
4 exposure is associated with persistent cough during the first year of life. *Sci Total Environ*,  
5 2011;409:4667-4673.  
6  
7  
8  
9 19. Miyake Y, Tanaka K, Fujiwara H, *et al.* Residential proximity to main roads during pregnancy  
10 and the risk of allergic disorders in Japanese infants: the Osaka Maternal and Child Health  
11 Study. *Pediatr Allergy Immunol* 2010;21:22-28.  
12  
13 20. Harrod KS, Jaramillo RJ, Rosenberger CL, *et al.* Increased susceptibility to RSV infection by  
14 exposure to inhaled diesel engine emissions. *Am J Respir Cell Mol Biol* 2003;28:451-463.  
15  
16 21. Castranova V, Ma JY, Yang HM, *et al.* Effect of exposure to diesel exhaust particles on the  
17 susceptibility of the lung to infection. *Environ Health Perspect* 2001;109:609-612.  
18  
19 22. Magnus P, Birke C, Vejrup K, *et al.* Cohort Profile Update: The Norwegian Mother and Child  
20 Cohort Study (MoBa). *Int J Epidemiol* 2016;45:382-388.  
21  
22 23. Panasevich S, Håberg SE, Aamodt G, *et al.* Association between pregnancy exposure to air  
23 pollution and birth weight in selected areas of Norway. *Archives of Public Health* 2016;74:26.  
24  
25 24. Beelen R, Hoek G, Vienneau D, *et al.* Development of NO<sub>2</sub> and NO<sub>x</sub> land use regression  
26 models for estimating air pollution exposure in 36 study areas in Europe - The ESCAPE  
27 project. *Atmospheric Environment* 2013;72:10-23.  
28  
29 25. Pedersen M, Giorgis-Allemand L, Bernard C, *et al.* Ambient air pollution and low  
30 birthweight: a European cohort study (ESCAPE). *Lancet Respir Med* 2013;1:695-704.  
31  
32 26. Schisterman EF, Cole SR, Platt RW. Overadjustment Bias and Unnecessary Adjustment in  
33 Epidemiologic Studies. *Epidemiology*, 2009;20(4):488-495.  
34  
35 27. Gehring U, Gruzieva O, Agius RM, *et al.* Air pollution exposure and lung function in  
36 children: the ESCAPE project. *Environ Health Perspect* 2013;121:1357-1364.  
37  
38 28. Miyake Y, Tanaka K, Fujiwara H, *et al.* Residential proximity to main roads during pregnancy  
39 and the risk of allergic disorders in Japanese infants: the Osaka Maternal and Child Health  
40 Study. *Pediatr Allergy Immunol* 2010;21:22-28.  
41  
42  
43  
44  
45  
46  
47  
48  
49  
50  
51  
52  
53  
54  
55  
56  
57  
58  
59  
60

- 1  
2  
3 29. Canfield MA, Ramadhani TA, Langlois PH, *et al.* Residential mobility patterns and exposure  
4 misclassification in epidemiologic studies of birth defects. *J Sci Environ Epidemiol*,  
5 2006;16:538-543.  
6  
7  
8  
9 30. Madsen C, Gehring U, Walker SE, *et al.* Ambient air pollution exposure, residential mobility  
10 and term birth weight in Oslo, Norway. *Environmental Research*, 2010;110:363-371.  
11  
12 31. Muenchhoff M, Goulder PJ. Sex differences in pediatric infectious diseases. *J Infect Dis*  
13 2014;209:S120-126.  
14  
15 32. Simoes EA. Environmental and demographic risk factors for respiratory syncytial virus lower  
16 respiratory tract disease. *J Pediatr* 2003;143:S118-126.  
17  
18 33. Cyrus J, Heinrich J, Richter K, Wolke G, *et al.* Sources and concentrations of indoor nitrogen  
19 dioxide in Hamburg (west Germany) and Erfurt (west Germany). *Sci Total Environ*,  
20 2000;250:51-62.  
21  
22 34. Cyrus J, Eeftens M, Heinrich J, Ampe C, *et al.* Variation of NO<sub>2</sub> and NO<sub>x</sub> concentrations  
23 between and within 36 European study areas: Results from the ESCAPE study. *Atmos*  
24 *Environ*, 2012;62:374-390.  
25  
26  
27  
28  
29  
30  
31  
32  
33  
34  
35  
36  
37  
38  
39  
40  
41  
42  
43  
44  
45  
46  
47  
48  
49  
50  
51  
52  
53  
54  
55  
56  
57  
58  
59  
60

**Table 1.** Descriptive statistics for study participants from the MOBA cohort.

|                                                              | <b>Baseline cohort at birth with NO<sub>2</sub> data (N=17 533)</b> | <b>Questionnaire at 6 months (N=14 386)</b> | <b>Questionnaire at 18 months (N=12 231)</b> |
|--------------------------------------------------------------|---------------------------------------------------------------------|---------------------------------------------|----------------------------------------------|
| Oslo                                                         | 4 669 (26.6)                                                        | 3 801 (26.4)                                | 3 320 (27.1)                                 |
| Akershus                                                     | 7 554 (43.1)                                                        | 6 284 (43.7)                                | 5 350 (43.7)                                 |
| Bergen                                                       | 3 869 (22.1)                                                        | 3 135 (21.8)                                | 2 591 (21.2)                                 |
| Hordaland                                                    | 1 441 (8.2)                                                         | 1 166 (8.1)                                 | 970 (7.9)                                    |
| LRTI0- 6 months                                              |                                                                     | 653 (4.5)                                   |                                              |
| Missing                                                      |                                                                     | 500 (3.5)                                   |                                              |
| LRTI 6- 18 months                                            |                                                                     |                                             | 1 469 (12.0)                                 |
| Missing                                                      |                                                                     |                                             | 230 (1.9)                                    |
| Wheeze 6- 18 months                                          |                                                                     |                                             | 4 961 (40.6)                                 |
| Missing                                                      |                                                                     |                                             | 255 (2.1)                                    |
| Women who changed address during pregnancy                   | 2 336 (13.3)                                                        | 1 782 (12.4)                                | 1 471 (12.0)                                 |
| Parity                                                       |                                                                     |                                             |                                              |
| 0                                                            | 8 310 (47.4)                                                        | 6 973 (48.5)                                | 6 003 (49.1)                                 |
| 1                                                            | 6 328 (36.1)                                                        | 5 138 (35.7)                                | 4 310 (35.2)                                 |
| ≥2                                                           | 2 895 (16.5)                                                        | 2 275 (15.8)                                | 1 918 (15.7)                                 |
| Sex of child                                                 |                                                                     |                                             |                                              |
| Boy                                                          | 8 925 (50.9)                                                        | 7 285 (50.6)                                | 6 177 (50.5)                                 |
| Girl                                                         | 8 608 (49.1)                                                        | 7 101 (49.4)                                | 6 054 (49.5)                                 |
| Maternal age at delivery, years                              | 31.0 ± 4.5                                                          | 31.1 ± 4.4                                  | 31.2 ± 4.3                                   |
| Marital status                                               |                                                                     |                                             |                                              |
| Married/cohabiting                                           | 16 780 (95.7)                                                       | 13 839 (96.2)                               | 11 797 (96.5)                                |
| Other                                                        | 753 (4.3)                                                           | 547 (3.8)                                   | 434 (3.6)                                    |
| Maternal education                                           |                                                                     |                                             |                                              |
| Less than high school                                        | 986 (5.6)                                                           | 713 (5.0)                                   | 547 (4.5)                                    |
| High school                                                  | 4 175 (23.8)                                                        | 3 465 (24.1)                                | 2 845 (23.3)                                 |
| Up to 4 years of college                                     | 6 480 (37.0)                                                        | 5 677 (39.5)                                | 4 919 (40.2)                                 |
| More than 4 years of college (master or professional degree) | 4 867 (27.8)                                                        | 4 254 (29.6)                                | 3 731 (30.5)                                 |
| Missing                                                      | 1 025 (5.9)                                                         | 277 (1.9)                                   | 189 (1.6)                                    |
| Maternal smoking during pregnancy                            | 1 085 (6.2)                                                         | 843 (5.9)                                   | 675 (5.5)                                    |
| Missing                                                      | 1 000 (5.7)                                                         | 263 (1.8)                                   | 185 (1.5)                                    |
| Maternal pre-pregnancy body mass index <sup>a</sup>          | 23.5 ± 3.8                                                          | 23.5 ± 3.7                                  | 23.5 ± 3.7                                   |
| Maternal atopy                                               | 5 802 (33.1)                                                        | 4 947 (34.4)                                | 4 276 (35.0)                                 |
| Season of birth                                              |                                                                     |                                             |                                              |
| Winter                                                       | 4 099 (23.4)                                                        | 3 352 (23.3)                                | 2 858 (23.4)                                 |
| Spring                                                       | 4 686 (26.7)                                                        | 3 851 (26.8)                                | 3 191 (26.1)                                 |
| Summer                                                       | 4 630 (26.4)                                                        | 3 827 (26.6)                                | 3 312 (27.1)                                 |
| Autumn                                                       | 4 118 (23.5)                                                        | 3 356 (23.3)                                | 2 870 (23.5)                                 |

Numbers are n (%) or mean ± standard deviation.

LRTI – lower respiratory tract infections.

<sup>a</sup>Missing data for maternal pre-pregnancy body mass index (BMI): baseline cohort 1 549 (8.8%), at 6 months 693 (4.8%), at 18 months 522 (4.3%).



**Table 2.** LUR modelled air pollution exposure using residential address at time of birth. Exposure during the whole pregnancy and by trimester.

|                                                                 | <b>Oslo</b>    | <b>Akershus</b> | <b>Bergen</b>  | <b>Hordaland</b> | <b>Total</b>    |
|-----------------------------------------------------------------|----------------|-----------------|----------------|------------------|-----------------|
|                                                                 | <b>N=4 669</b> | <b>N=7 554</b>  | <b>N=3 869</b> | <b>N=1 441</b>   | <b>N=17 533</b> |
| Mean LUR modelled NO <sub>2</sub> exposure (µg/m <sup>3</sup> ) |                |                 |                |                  |                 |
| Whole pregnancy                                                 | 21.6 ± 4.4     | 10.3 ± 3.8      | 13.2 ± 6.2     | 6.3 ± 4.3        | 13.6 ± 6.9      |
| Trimester 1                                                     | 21.7 ± 6.1     | 10.2 ± 4.2      | 13.4 ± 6.4     | 6.5 ± 4.4        | 13.7 ± 7.4      |
| Trimester 2                                                     | 22.0 ± 6.1     | 10.4 ± 4.3      | 13.3 ± 6.5     | 6.3 ± 4.3        | 13.8 ± 7.5      |
| Trimester 3                                                     | 21.5 ± 6.1     | 10.3 ± 4.2      | 13.1 ± 6.3     | 6.3 ± 4.3        | 13.6 ± 7.3      |

Numbers are mean ± standard deviation

LUR – land use regression

European Union air quality standard for NO<sub>2</sub>: 1-year average 40 µg/m<sup>3</sup>

**Table 3.** Associations between pregnancy exposure to NO<sub>2</sub> and respiratory health of children by age 6 and 18 months.

|                                        | Crude   |         |                     | Adjusted |         |                     |
|----------------------------------------|---------|---------|---------------------|----------|---------|---------------------|
|                                        | N total | N cases | RR (95% CI)         | N total  | N cases | RR (95% CI)         |
| <b>Main analysis<sup>a</sup></b>       |         |         |                     |          |         |                     |
| LRTI 0-6 months                        | 13 886  | 653     | 0.84 (0.76 to 0.95) | 13 116   | 616     | 0.99 (0.84 to 1.17) |
| LRTI 6-18 months                       | 12 001  | 1 469   | 0.94 (0.94 to 1.01) | 11 412   | 1 388   | 1.05 (0.94 to 1.16) |
| Wheeze 6-18 months                     | 11 976  | 4 961   | 1.00 (0.97 to 1.03) | 11 387   | 4 712   | 1.02 (0.97 to 1.07) |
| <b>Stratified analysis<sup>b</sup></b> |         |         |                     |          |         |                     |
| <b>Oslo</b>                            |         |         |                     |          |         |                     |
| LRTI 0-6 months                        | 3 695   | 136     | 0.72 (0.51 to 1.02) | 3 530    | 128     | 0.76 (0.54 to 1.06) |
| LRTI 6-18 months                       | 3 246   | 351     | 0.85 (0.69 to 1.06) | 3 111    | 331     | 0.89 (0.71 to 1.12) |
| Wheeze 6-18 months                     | 3 248   | 1 315   | 1.05 (0.96 to 1.16) | 3 111    | 1 253   | 1.04 (0.95 to 1.15) |
| <b>Akershus</b>                        |         |         |                     |          |         |                     |
| LRTI 0-6 months                        | 6 014   | 281     | 1.22 (0.90 to 1.65) | 5 619    | 263     | 1.32 (0.97 to 1.80) |
| LRTI 6-18 months                       | 5 237   | 689     | 1.15 (0.96 to 1.38) | 4 939    | 649     | 1.15 (0.95 to 1.39) |
| Wheeze 6-18 months                     | 5 228   | 2 192   | 1.01 (0.93 to 1.10) | 4 930    | 2 066   | 1.12 (0.94 to 1.34) |
| <b>Bergen</b>                          |         |         |                     |          |         |                     |
| LRTI 0-6 months                        | 3 045   | 169     | 0.90 (0.71 to 1.16) | 2 899    | 161     | 0.96 (0.74 to 1.25) |
| LRTI 6-18 months                       | 2 560   | 318     | 1.00 (0.85 to 1.18) | 2 449    | 301     | 1.04 (0.86 to 1.22) |
| Wheeze 6-18 months                     | 2 548   | 1 073   | 1.00 (0.93 to 1.07) | 2 438    | 1 030   | 1.00 (0.89 to 1.07) |
| <b>Hordaland</b>                       |         |         |                     |          |         |                     |
| LRTI 0-6 months                        | 1 132   | 67      | 0.84 (0.49 to 1.46) | 1 068    | 64      | 0.93 (0.50 to 1.63) |
| LRTI 6-18 months                       | 958     | 111     | 1.31 (0.89 to 1.93) | 913      | 107     | 1.36 (0.88 to 2.03) |
| Wheeze 6-18 months                     | 952     | 381     | 1.19 (1.00 to 1.42) | 908      | 363     | 1.12 (0.94 to 1.34) |

Effect estimates per 10µg/m<sup>3</sup> NO<sub>2</sub>

LRTI – lower respiratory tract infections

<sup>a</sup>Adjusted for maternal age at delivery, years of birth, maternal marital status, maternal education, sex of child, maternal prepregnancy BMI, smoking during pregnancy, parity, maternal atopy and study area.

<sup>b</sup>Adjusted for maternal age at delivery, year of birth, maternal marital status, maternal education, sex of child, maternal prepregnancy BMI, smoking during pregnancy, parity, maternal atopy.

STROBE Statement—Checklist of items that should be included in reports of *cohort studies*

|                              | Item No | Recommendation                                                                                                                                                                                                                                                                                                                                                                                                                                            |
|------------------------------|---------|-----------------------------------------------------------------------------------------------------------------------------------------------------------------------------------------------------------------------------------------------------------------------------------------------------------------------------------------------------------------------------------------------------------------------------------------------------------|
| <b>Title and abstract</b>    | 1       | (a) Indicate the study's design with a commonly used term in the title or the abstract – <a href="#">page 1</a> .<br>(b) Provide in the abstract an informative and balanced summary of what was done and what was found – <a href="#">page 2</a> .                                                                                                                                                                                                       |
| <b>Introduction</b>          |         |                                                                                                                                                                                                                                                                                                                                                                                                                                                           |
| Background/rationale         | 2       | Explain the scientific background and rationale for the investigation being reported – <a href="#">page 4</a> .                                                                                                                                                                                                                                                                                                                                           |
| Objectives                   | 3       | State specific objectives, including any prespecified hypotheses – <a href="#">page 5</a> .                                                                                                                                                                                                                                                                                                                                                               |
| <b>Methods</b>               |         |                                                                                                                                                                                                                                                                                                                                                                                                                                                           |
| Study design                 | 4       | Present key elements of study design early in the paper – <a href="#">page 5</a> .                                                                                                                                                                                                                                                                                                                                                                        |
| Setting                      | 5       | Describe the setting, locations, and relevant dates, including periods of recruitment, exposure, follow-up, and data collection – <a href="#">page 5</a> .                                                                                                                                                                                                                                                                                                |
| Participants                 | 6       | (a) Give the eligibility criteria, and the sources and methods of selection of participants. Describe methods of follow-up – <a href="#">page 5</a> .<br>(b) For matched studies, give matching criteria and number of exposed and unexposed – <a href="#">N.A.</a>                                                                                                                                                                                       |
| Variables                    | 7       | Clearly define all outcomes, exposures, predictors, potential confounders, and effect modifiers. Give diagnostic criteria, if applicable – <a href="#">page 6 and 7</a> .                                                                                                                                                                                                                                                                                 |
| Data sources/<br>measurement | 8*      | For each variable of interest, give sources of data and details of methods of assessment (measurement). Describe comparability of assessment methods if there is more than one group – <a href="#">page 6 and 7</a> .                                                                                                                                                                                                                                     |
| Bias                         | 9       | Describe any efforts to address potential sources of bias – <a href="#">N.A.</a>                                                                                                                                                                                                                                                                                                                                                                          |
| Study size                   | 10      | Explain how the study size was arrived at – <a href="#">page 5</a> .                                                                                                                                                                                                                                                                                                                                                                                      |
| Quantitative variables       | 11      | Explain how quantitative variables were handled in the analyses. If applicable, describe which groupings were chosen and why – <a href="#">page 6</a> .                                                                                                                                                                                                                                                                                                   |
| Statistical methods          | 12      | (a) Describe all statistical methods, including those used to control for confounding – <a href="#">page 8</a> .<br>(b) Describe any methods used to examine subgroups and interactions – <a href="#">page 8</a> .<br>(c) Explain how missing data were addressed – <a href="#">page 7</a> .<br>(d) If applicable, explain how loss to follow-up was addressed – <a href="#">N.A.</a><br>(e) Describe any sensitivity analyses – <a href="#">page 8</a> . |
| <b>Results</b>               |         |                                                                                                                                                                                                                                                                                                                                                                                                                                                           |
| Participants                 | 13*     | (a) Report numbers of individuals at each stage of study—eg numbers potentially eligible, examined for eligibility, confirmed eligible, included in the study, completing follow-up, and analysed – <a href="#">page 5 and Table 1</a> .<br>(b) Give reasons for non-participation at each stage – <a href="#">page 5</a> .<br>(c) Consider use of a flow diagram – <a href="#">N.A.</a>                                                                  |
| Descriptive data             | 14*     | (a) Give characteristics of study participants (eg demographic, clinical, social) and information on exposures and potential confounders – <a href="#">page 8 and 9</a> .<br>(b) Indicate number of participants with missing data for each variable of interest – <a href="#">page 5</a> .<br>(c) Summarise follow-up time (eg, average and total amount) – <a href="#">page 5</a> .                                                                     |
| Outcome data                 | 15*     | Report numbers of outcome events or summary measures over time – <a href="#">page 8 and Table 1</a> .                                                                                                                                                                                                                                                                                                                                                     |
| Main results                 | 16      | (a) Give unadjusted estimates and, if applicable, confounder-adjusted estimates and                                                                                                                                                                                                                                                                                                                                                                       |

|                          |    |                                                                                                                                                                                                       |
|--------------------------|----|-------------------------------------------------------------------------------------------------------------------------------------------------------------------------------------------------------|
|                          |    | their precision (eg, 95% confidence interval). Make clear which confounders were adjusted for and why they were included – <a href="#">pages 8-9, Figure 1 and Tables 2-3.</a>                        |
|                          |    | (b) Report category boundaries when continuous variables were categorized – <a href="#">page 8 and 9.</a>                                                                                             |
|                          |    | (c) If relevant, consider translating estimates of relative risk into absolute risk for a meaningful time period – <a href="#">N.A.</a>                                                               |
| Other analyses           | 17 | Report other analyses done—eg analyses of subgroups and interactions, and sensitivity analyses – <a href="#">page 9.</a>                                                                              |
| <b>Discussion</b>        |    |                                                                                                                                                                                                       |
| Key results              | 18 | Summarise key results with reference to study objectives – <a href="#">page 9.</a>                                                                                                                    |
| Limitations              | 19 | Discuss limitations of the study, taking into account sources of potential bias or imprecision. Discuss both direction and magnitude of any potential bias – <a href="#">page 11.</a>                 |
| Interpretation           | 20 | Give a cautious overall interpretation of results considering objectives, limitations, multiplicity of analyses, results from similar studies, and other relevant evidence – <a href="#">page 11.</a> |
| Generalisability         | 21 | Discuss the generalisability (external validity) of the study results – <a href="#">page 10-11.</a>                                                                                                   |
| <b>Other information</b> |    |                                                                                                                                                                                                       |
| Funding                  | 22 | Give the source of funding and the role of the funders for the present study and, if applicable, for the original study on which the present article is based – <a href="#">page 12.</a>              |

\*Give information separately for exposed and unexposed groups.

**Note:** An Explanation and Elaboration article discusses each checklist item and gives methodological background and published examples of transparent reporting. The STROBE checklist is best used in conjunction with this article (freely available on the Web sites of PLoS Medicine at <http://www.plosmedicine.org/>, Annals of Internal Medicine at <http://www.annals.org/>, and Epidemiology at <http://www.epidem.com/>). Information on the STROBE Initiative is available at <http://www.strobe-statement.org>.
